# Supplementary material for: Molecular basis of the PIP2-dependent regulation of CaV2.2 channel and its modulation by CaV β subunits
Source: eLife. 2022 Nov 14;11:e69500. doi: 10.7554/eLife.69500 (PMC9662827; doi:10.7554/eLife.69500)
Supplement: Figure 1—figure supplement 1—source data 1. [file elife-69500-fig1-figsupp1-data1.xlsx]

## Sheet: Sheet1
Figure 1 - figure supplement 1 - Source Data 1
Pearson’s coefficient between Lyn-mCh and the β2 construct in the presence of α1 subunit and α2δ1 subunit.
Figure1 - figure supplement 1 B and C: Pearson’s coefficient between Lyn-mCh and the β2 construct in the presence of α1 subunit and α2δ1 subunit
Pearson’s coefficient	n_1	n_2	n_3	n_4	n_5	n_6	n_7	n_8	n_9	n_10	n_11	Average	SE
B2a	0.707	0.559	0.683	0.651	0.601	0.814	0.731	0.62	0.685	0.791	0.665	0.682455	0.0231836
B2a (C3,4S)	0.623	0.695	0.69	0.711	0.725	0.681	0.669	0.767	0.646	0.69	0.77	0.697	0.0136275
B2c	0.725	0.62	0.754	0.739	0.652	0.637	0.824	0.62				0.696375	0.0265269
Lyn-B2c	0.707	0.678	0.803	0.73	0.583	0.566	0.792	0.801	0.819	0.632	0.637	0.704364	0.0277811
Lyn-48aa-B2c	0.645	0.735	0.79	0.7	0.618	0.825	0.756	0.695	0.594	0.777	0.583	0.701636	0.0249881
