# Supplementary material for: Molecular basis of the PIP2-dependent regulation of CaV2.2 channel and its modulation by CaV β subunits
Source: eLife. 2022 Nov 14;11:e69500. doi: 10.7554/eLife.69500 (PMC9662827; doi:10.7554/eLife.69500)
Supplement: Figure 1—figure supplement 2—source data 1. [file elife-69500-fig1-figsupp2-data1.xlsx]

## Sheet: Sheet1
Figure 1 - figure supplement 2 - Source Data 1
Current inhibition (%) by a depolarizing pulse in cells in the absence of Dr-VSP.
Figure1 - figure supplement 2: Current inhibition (%) by a depolarizing pulse in cells in the absence of Dr-VSP
Current inhibition (%)	No VSP_1	No VSP_2	No VSP_3	No VSP_4	No VSP_5	No VSP_6	Average	SE
B2a	2.19	0.681	2.42	3.03	-4.31	-3.84	0.0294	1.34
B2a (C3,4S)	-5.23	0.388	-2.8	-1.06	0.17	3.37	-0.86	1.2
B2c	-2.67	-2.86	-5.08	-3.89	3.84	3.08	-1.27	1.54
Lyn-B2c	-3.62	-4.42	4.52	-0.786	-5.29	2.57	-1.17	1.63
Lyn-48aa-B2c	-5.73	-4.51	3.43	1.37	0.979	-2.11	-1.1	1.47
