# Supplementary material for: Molecular basis of the PIP2-dependent regulation of CaV2.2 channel and its modulation by CaV β subunits
Source: eLife. 2022 Nov 14;11:e69500. doi: 10.7554/eLife.69500 (PMC9662827; doi:10.7554/eLife.69500)
Supplement: Figure 1—figure supplement 2—source data 2. [file elife-69500-fig1-figsupp2-data2.xlsx]

## Sheet: Sheet1
Figure 1 - figure supplement 2 - Source Data 2
Summary of the CaV2.2 current inhibition by Dr-VSP-mediated PIP2 depletion in cells were recorded with pipette solution containing GDP-β-S.
Figure1 - figure supplement 2 C and D: Summary of the CaV2.2 current inhibition (%) by a depolarizing pulse to +120 mV in control and Dr-VSP-expressing cells were recorded with pipette solution containing GDP-β-S
Control (without Dr-VSP)
Current inhibition (%)	No VSP_1	No VSP_2	No VSP_3	No VSP_4	No VSP_5	No VSP_6	No VSP_7	No VSP_8	No VSP_9	No VSP_10	Average	SE
B2a	-2.89201	-6.53866	-5.94353	-4.71554	-3.5974	0.147946	-2.12259	1.29644	-2.24703	3.71036	-2.2902	1.02304
B2a (C3,4S)	-1.13315	-1.82787	-3.62742	-4.12885	-2.53303	-3.92222	1.92914				-2.17763	0.804124
B2c	0.0166514	0.293242	-0.799192	-6.62842	-5.67913	-2.73668	-4.91232	-3.88562			-3.04143	0.941402
Lyn-B2c	4.72022	2.20537	-0.126811	-7.23093	-4.42223	1.6803	-2.08135				-0.750778	1.56001
Lyn-48aa-B2c	-3.63095	-4.69912	-0.852291	-0.201024	2.43966	2.29993	-0.546095	0.995432	-4.7373		-0.992418	0.929016
With Dr-VSP
Current inhibition (%)	VSP_1	VSP_2	VSP_3	VSP_4	VSP_5	VSP_6	VSP_7	VSP_8	VSP_9	VSP_10	VSP_11	Average	SE
B2a	10.2163	8.91117	4.92728	1.69714	4.70823	2.50935	7.75336	2.58486	4.64213	7.91302		5.58629	0.932739
B2a (C3,4S)	29.0003	41.4205	31.1512	30.6494	19.4271	22.1006	29.4793	33.157	28.4953	39.9959		30.4877	2.15356
B2c	28.92	24.7801	32.8441	24.3825	24.5855	23.619	32.7321	25.8259	34.3959	36.7827	38.0442	29.7193	1.6297
Lyn-B2c	8.39476	11.5295	8.14626	8.07856	3.90181	2.02525	4.16358	2.30161				6.06767	1.21341
Lyn-48aa-B2c	25.778	29.3775	37.6084	39.3909	20.0817	26.0755	29.6882	33.1814	25.5828	34.8368		30.1601	1.91756
