# Supplementary material for: Molecular basis of the PIP2-dependent regulation of CaV2.2 channel and its modulation by CaV β subunits
Source: eLife. 2022 Nov 14;11:e69500. doi: 10.7554/eLife.69500 (PMC9662827; doi:10.7554/eLife.69500)
Supplement: Figure 1—figure supplement 3—source data 1. [file elife-69500-fig1-figsupp3-data1.xlsx]

## Sheet: Sheet1
Figure 1 - figure supplement 3 - Source Data 1
Current inactivation (r100) and current inhibition (%) by PIP2 depletion in CaV2.2 channels with chimeric Lyn-linker-β2c derivatives.
Figure1 - figure supplement 3 B and C: Current inactivation (r100) in CaV2.2 channels with chimeric Lyn-linker-β2c derivatives
Statistical analysis from GraphPad Prism 7.0 (one-way ANOVA followed by Tukey post-hoc test)
Current inactivation (r100)	n_1	n_2	n_3	n_4	n_5	n_6	n_7	n_8	n_9	n_10	n_11	n_12	Average	SE
Lyn-12aa-β2c	0.905362	0.903513	0.869461	0.929208	0.86433	0.958888	0.906082	0.889437	0.942836	0.900021	0.78459	0.862922	0.893054	0.0131039
Lyn-24aa-β2c	0.851194	0.986176	0.931126	0.872677	0.837254	0.842622	0.807036	0.850005	0.946657	0.793604	0.814594	0.874845	0.867316	0.0170782
Lyn-36aa-β2c	0.759113	0.853584	0.786197	0.721692	0.809993	0.732928	0.788797	0.876072	0.817684				0.794007	0.0172265
Figure1 - figure supplement 3 D and E: Current inhibition (%) by PIP2 depletion in CaV2.2 channels with chimeric Lyn-linker-β2c derivatives
Statistical analysis from GraphPad Prism 7.0 (one-way ANOVA followed by Tukey post-hoc test)
Current inhibition (%)	n_1	n_2	n_3	n_4	n_5	n_6	n_7	n_8	n_9	n_10	n_11	n_12	Average	SE
Lyn-12aa-β2c	16.4877	6.05071	14.1354	8.22523	5.86356	8.4584	11.7805	7.36471	14.41	12.0736	11.798	13.6005	10.854	1.02518
Lyn-24aa-β2c	14.1921	10.8653	11.2019	9.38988	9.70878	8.05896	7.99449	11.6361	12.7393				10.643	0.69195
Lyn-36aa-β2c	24.2089	16.4875	31.1247	19.5756	15.9034	17.0976	17.4691	29.4785	26.8606				22.0229	1.99195
