# Supplementary material for: Molecular basis of the PIP2-dependent regulation of CaV2.2 channel and its modulation by CaV β subunits
Source: eLife. 2022 Nov 14;11:e69500. doi: 10.7554/eLife.69500 (PMC9662827; doi:10.7554/eLife.69500)
Supplement: Figure 1—source data 1. [file elife-69500-fig1-data1.xlsx]

## Sheet: Sheet1
Figure 1 - Source Data 1
Current inactivation (r100) and current inhibition (%) by PIP2 depletion in N-type CaV2.2 channels with different subtypes of the β2 subunit.
Figure1 B and C: Pearson’s coefficient between Lyn-mCh and the β2 construct
Statistical analysis from GraphPad Prism 7.0 (one-way ANOVA followed by Tukey post-hoc test)
Pearson’s coefficient	n_1	n_2	n_3	n_4	n_5	n_6	n_7	n_8	n_9	n_10	n_11	Average	SE
β2a	0.638	0.613	0.647	0.786	0.632	0.744	0.622	0.771	0.764	0.738	0.754	0.700818	0.0208352
β2a (C3,4S)	0.224	0.289	0.202	0.367	0.393	0.368	0.436	0.307	0.14	0.222		0.2948	0.0304086
β2c	0.295	0.331	0.313	0.201	0.302	0.345	0.424	0.451	0.288	0.39		0.334	0.0230569
Lyn-β2c	0.787	0.816	0.553	0.723	0.842	0.66	0.685	0.66	0.792	0.594	0.722	0.712182	0.0278476
Lyn-48aa-β2c	0.747	0.766	0.622	0.771	0.662	0.665	0.8	0.733	0.664	0.785	0.627	0.712909	0.019878
Figure1 D and E: Current inactivation (r100) and inhibition (%) by PIP2 depletion in CaV2.2 channels with the β2 construct
Statistical analysis from GraphPad Prism 7.0 (one-way ANOVA followed by Tukey post-hoc test)
Current inactivation (r100)	n_1	n_2	n_3	n_4	n_5	n_6	n_7	n_8	n_9	n_10	n_11	Average	SE
β2a	0.935146	0.894869	0.90984	0.930211	0.922265	0.893478	1.03231	1.00145	0.919843	0.864672		0.930409	0.0159872
β2a (C3,4S)	0.56836	0.654133	0.738789	0.67009	0.478939	0.39237	0.505093	0.567156	0.389638	0.493188		0.545775	0.0368505
β2c	0.592958	0.60183	0.515533	0.602517	0.611173	0.631843	0.726095	0.462133	0.639628	0.45583		0.583954	0.0264618
Lyn-β2c	0.940016	1.01255	0.959326	0.920369	0.985517	0.978008	0.93617	0.889801	0.980358	0.97533	0.958225	0.957788	0.010358
Lyn-48aa-β2c	0.646936	0.696416	0.478999	0.605572	0.708104	0.690523	0.773825	0.781504	0.602939	0.697616		0.668244	0.028319
Statistical analysis from GraphPad Prism 7.0 (one-way ANOVA followed by Tukey post-hoc test)
Current inhibition (%)	n_1	n_2	n_3	n_4	n_5	n_6	n_7	n_8	n_9	n_10	n_11	Average	SE
β2a	2.60541	8.73217	3.64698	1.43989	2.48914	10.2471	4.66553	6.67451	3.11326	12.0366		5.56506	1.15855
β2a (C3,4S)	25.4778	21.1609	22.4391	24.4378	31.6022	25.3635	30.9358	31.8254	26.3833	44.6615		28.4287	2.15589
β2c	28.4438	40.7815	38.3385	39.4907	23.184	29.2508	19.4974	24.1279	24.7198	24.9921	27.9381	29.1604	2.17325
Lyn-β2c	10.1193	4.25324	3.01099	6.49709	3.11648	9.97026	2.09307	7.22206	10.0044	6.93094	6.08359	6.30013	0.883969
Lyn-48aa-β2c	29.5441	26.0771	22.6077	34.7895	23.7696	23.9213	22.841	23.406	33.8118	33.6925		27.4461	1.58682
