# Supplementary material for: Molecular basis of the PIP2-dependent regulation of CaV2.2 channel and its modulation by CaV β subunits
Source: eLife. 2022 Nov 14;11:e69500. doi: 10.7554/eLife.69500 (PMC9662827; doi:10.7554/eLife.69500)
Supplement: Figure 2—figure supplement 1—source data 1. [file elife-69500-fig2-figsupp1-data1.xlsx]

## Sheet: Sheet1
Figure 2 - figure supplement 1 - Source Data 1
Current-voltage (I-V) curve of CaV2.2 current
Figure2 - figure supplement 1: Current-voltage (I-V) curve of CaV2.2 current
(ΔN)β2 WT
voltage									Normalization	voltage	n_1	n_2	n_3	n_4	n_5	n_6	n_7	n_8	Average	SE
-50	-1.69267e-11	-1.24137e-11	-2.31071e-11	-8.24999e-12	-4.09867e-13	-3.25697e-12	-1.33147e-11	-5.42565e-12		-50	-0.00571164	-0.0115109	-0.2122	-0.00086283	-0.00144611	0	-0.000301035	-0.00140762	-0.02918	0.0261817
-40	-1.35261e-11	-7.73459e-12	-1.65597e-11	-6.14964e-12	1.52832e-12	-3.29332e-12	-1.24534e-11	-3.497e-12		-40	-0.000463106	-0.00416719	-0.196772	0	0	-5.50721e-05	0	-0.000221285	-0.0252098	0.0245141
-30	-1.31601e-11	-5.08244e-12	-1.45451e-11	-1.09121e-11	-3.07748e-12	-3.9767e-12	-2.59977e-11	-3.1367e-12		-30	0	0	-0.191787	-0.00195164	-0.00343637	-0.00132173	-0.00507996	0	-0.0254471	0.0237716
-20	-3.66517e-11	-1.32254e-11	-6.31126e-11	-1.10498e-10	-4.44532e-11	-3.0316e-11	-1.43163e-10	-2.96238e-11		-20	-0.0362766	-0.0127689	-0.307145	-0.042669	-0.0343116	-0.0496384	-0.0491063	-0.0162645	-0.0685225	0.0344322
-10	-2.56897e-10	-1.15757e-10	-2.48334e-10	-9.13116e-10	-3.59058e-10	-1.67239e-10	-8.54441e-10	-2.24682e-10		-10	-0.376351	-0.174424	-0.746024	-0.372599	-0.268745	-0.300584	-0.316651	-0.136373	-0.336469	0.0658997
0	-6.60668e-10	-4.57455e-10	-3.54839e-10	-2.44262e-09	-1.25148e-09	-4.98505e-10	-2.4696e-09	-1.15618e-09		0	-1	-0.710655	-1	-1	-0.932912	-0.910049	-0.924741	-0.7111	-0.898682	0.0429529
10	-6.02324e-10	-6.4066e-10	-2.39425e-10	-2.09431e-09	-1.33821e-09	-5.47846e-10	-2.67422e-09	-1.6334e-09		10	-0.908923	-1	-0.724662	-0.857966	-1	-1	-1	-1	-0.936444	0.0358481
20	-3.75491e-10	-4.69682e-10	-1.01755e-10	-1.29172e-09	-9.02639e-10	-3.76652e-10	-1.72561e-09	-1.24319e-09		20	-0.558506	-0.731098	-0.399478	-0.527498	-0.674253	-0.686089	-0.646284	-0.760274	-0.622935	0.0424518
30	-1.62062e-10	-2.41235e-10	-4.42865e-13	-6.08198e-10	-4.52236e-10	-1.88446e-10	-7.82011e-10	-6.88665e-10		30	-0.229701	-0.37099	-0.158422	-0.247283	-0.338069	-0.339134	-0.289558	-0.421585	-0.299343	0.0300815
40	-1.60575e-11	-6.06061e-11	6.62648e-11	-1.35375e-10	-1.08219e-10	-5.28893e-11	-1.43546e-10	-2.70874e-10		40	-0.00447669	-0.0873066	0	-0.0529408	-0.0816456	-0.091126	-0.0494826	-0.164648	-0.0664533	0.0187294
(ΔN)β2 Mut
voltage										Normalization	voltage	n_1	n_2	n_3	n_4	n_5	n_6	n_7	n_8	n_9	Average	SE
-50	-3.42669e-13	-1.71513e-12	-2.12488e-11	-2.21432e-11	6.82227e-12	6.15748e-13	1.1837e-11	1.48548e-11	-4.06394e-12		-50	-0.004263	-0.0142771	-0.0386769	-0.240881	-0.0280101	-0.0079293	0	-0.000330524	-0.0336709	-0.0408932	0.0254604
-40	2.22434e-12	2.12068e-12	-1.16621e-11	-9.47384e-12	1.42514e-11	2.12196e-12	1.07048e-11	1.50979e-11	-2.55131e-12		-40	0	-0.00421764	-0.0113992	-0.144909	-0.0154492	-0.00419553	-0.00187138	0	-0.0237406	-0.0228647	0.015485
-30	3.00587e-14	3.72598e-12	-1.12366e-11	-3.03927e-13	1.81682e-11	2.58614e-12	9.16709e-12	4.06394e-12	-2.72274e-13		-30	-0.00364243	0	-0.00996353	-0.0752584	-0.00890008	-0.00302872	-0.00447431	-0.0182449	-0.0087597	-0.0146969	0.00777316
-20	-6.16203e-12	2.69521e-12	-7.72843e-12	7.61554e-12	2.3501e-11	3.80816e-12	-5.39042e-12	-1.96829e-13	1.05884e-12		-20	-0.0139383	-0.00269824	0	-0.0150456	0	0	-0.0292446	-0.0252801	0	-0.00957854	0.00390249
-10	-5.1184e-11	-2.44005e-11	-2.98456e-11	5.5141e-12	1.00127e-11	-3.06548e-11	-9.06148e-11	-5.21712e-11	-1.27364e-11		-10	-0.0888527	-0.0736908	-0.0633704	-0.031079	-0.02267	-0.0856731	-0.174209	-0.111221	-0.0904906	-0.0823618	0.014915
0	-2.85263e-10	-1.81982e-10	-1.52875e-10	-4.38349e-11	-1.6435e-10	-1.86714e-10	-3.85618e-10	-2.93692e-10	-8.24485e-11		0	-0.477729	-0.486548	-0.417119	-0.405775	-0.314861	-0.473697	-0.676761	-0.510825	-0.548862	-0.479131	0.033587
10	-5.98565e-10	-3.78462e-10	-3.55716e-10	-1.21579e-10	-5.07395e-10	-3.99242e-10	-5.75786e-10	-5.89803e-10	-1.51435e-10		10	-1	-1	-1	-1	-0.890848	-1	-1	-1	-1	-0.987872	0.012128
20	-5.55707e-10	-3.74761e-10	-3.44523e-10	-1.07121e-10	-5.71746e-10	-3.81612e-10	-4.43096e-10	-5.5258e-10	-1.38456e-10		20	-0.928479	-0.992141	-0.968415	-0.886018	-1	-0.957796	-0.773733	-0.938853	-0.914507	-0.928882	0.0228744
30	-3.68369e-10	-2.36587e-10	-2.11655e-10	-4.06741e-11	-3.77257e-10	-2.40596e-10	-2.5128e-10	-3.52914e-10	-8.13796e-11		30	-0.615781	-0.630629	-0.586528	-0.382219	-0.672544	-0.607756	-0.447091	-0.608329	-0.542286	-0.565907	0.0312784
40	-1.68329e-10	-1.06347e-10	-7.97417e-11	9.60409e-12	-1.38422e-10	-1.07472e-10	-8.93982e-11	-1.64028e-10	-2.30122e-11		40	-0.283124	-0.287454	-0.20665	0	-0.271201	-0.275092	-0.172167	-0.295984	-0.158227	-0.216655	0.0321771
Lyn-(ΔN)β2 WT
voltage										Normalization	voltage	n_1	n_2	n_3	n_4	n_5	n_6	n_7	n_8	n_9	Average	SE
-50	-2.72232e-11	-3.61119e-12	-2.17126e-11	-3.64712e-13	-2.38816e-11	-7.39845e-12	-1.22001e-11	-2.26726e-11	-4.42923e-12		-50	-0.00536306	-0.00911399	-0.00613692	-0.00134002	-0.00297335	-0.0525531	0	-0.0230701	0	-0.0111723	0.00568966
-40	-2.11186e-11	-7.33018e-13	-1.58877e-11	-4.12078e-13	-1.57584e-11	-1.15292e-11	-1.46844e-11	-1.53737e-11	-4.5311e-12		-40	-0.0025183	-0.00122562	0	-0.00138517	0	-0.0536848	-0.000676078	-0.00994372	-4.26336e-05	-0.00771959	0.00583908
-30	-1.57087e-11	-2.85661e-13	-1.58838e-11	1.03256e-12	-1.84724e-11	-2.90487e-11	-2.2012e-11	-1.15471e-11	-5.85179e-12		-30	0	0	0	0	-0.000991117	-0.058515	-0.00265022	-0.00293097	-0.000605397	-0.00729919	0.00641338
-20	-3.86942e-11	-2.29607e-12	-2.55193e-11	-8.70099e-12	-8.52669e-11	-2.05244e-10	-6.66632e-11	-9.86677e-12	-2.82052e-11		-20	-0.0107261	-0.00552214	-0.0101577	-0.00934651	-0.0255121	-0.107094	-0.0147385	0	-0.010134	-0.0214701	0.0109464
-10	-2.6172e-10	-3.30289e-11	-1.79696e-10	-9.59478e-11	-6.11083e-10	-1.79825e-09	-4.51545e-10	-6.55115e-11	-2.40608e-10		-10	-0.114863	-0.0896977	-0.173632	-0.0931097	-0.218486	-0.547336	-0.118936	-0.100031	-0.100858	-0.172994	0.048926
0	-1.46083e-09	-1.93193e-10	-7.01546e-10	-5.45501e-10	-2.66759e-09	-3.44247e-09	-2.97404e-09	-3.11327e-10	-1.40657e-09		0	-0.673553	-0.528398	-0.725955	-0.52547	-0.974304	-1	-0.799881	-0.541474	-0.599245	-0.707587	0.0613804
10	-2.15584e-09	-3.65361e-10	-9.6072e-10	-1.04087e-09	-2.73831e-09	-2.59945e-09	-3.70605e-09	-5.65839e-10	-2.35091e-09		10	-1	-1	-1	-1	-1	-0.768148	-1	-1	-1	-0.974239	0.0257613
20	-1.53827e-09	-2.88755e-10	-7.07343e-10	-8.10741e-10	-1.82362e-09	-1.51759e-09	-2.55203e-09	-4.80803e-10	-1.79001e-09		20	-0.710861	-0.791618	-0.731245	-0.780026	-0.662286	-0.470052	-0.6863	-0.847158	-0.761252	-0.715644	0.0360522
30	-8.08328e-10	-1.64444e-10	-3.97736e-10	-4.63824e-10	-9.31736e-10	-5.36148e-10	-1.38857e-09	-2.78028e-10	-9.87358e-10		30	-0.369491	-0.448883	-0.404296	-0.446702	-0.336319	-0.198454	-0.3726	-0.482135	-0.418905	-0.386421	0.0279858
40	-2.28644e-10	-6.09267e-11	-1.46056e-10	-1.66058e-10	-2.65368e-10	1.83454e-10	-4.82091e-10	-1.12361e-10	-3.84118e-10		40	-0.099473	-0.166196	-0.137657	-0.160447	-0.0914764	0	-0.127049	-0.183644	-0.161824	-0.125307	0.0187501
Lyn-(ΔN)β2 Mut
voltage												Normalization	voltage	n_1	n_2	n_3	n_4	n_5	n_6	n_7	n_8	n_9	n_10	n_11	Average	SE
-50	-8.82198e-12	-8.66378e-12	-4.37134e-12	1.30254e-13	1.08762e-11	-7.60034e-12	-5.91819e-12	-1.13893e-11	-3.09431e-12	-2.10459e-11	-1.12833e-12		-50	-0.00532396	-0.0924909	-0.0164138	-0.00758938	-0.12588	-0.0148923	-0.00432726	-0.021835	-0.00985833	-0.0626188	-0.0194122	-0.0346038	0.0123201
-40	-5.27729e-12	-2.87304e-12	-2.31853e-12	2.85257e-12	2.62853e-11	-2.08081e-12	-3.98686e-12	-7.06407e-12	-1.02791e-12	-1.42695e-11	7.00443e-12		-40	-0.00137284	-0.0733377	-0.00990162	-0.00221357	-0.0806925	-0.00626631	0	-0.0137734	-0.00521115	-0.0343284	-0.010755	-0.021623	0.00873951
-30	-4.04804e-12	-8.33628e-13	7.97157e-13	3.96625e-12	4.28211e-11	1.93428e-12	-3.9997e-12	3.54603e-13	1.27693e-12	-9.74383e-12	1.48148e-11		-30	0	-0.0666027	0	0	-0.032277	0	-2.2421e-05	0	0	-0.0150741	-0.00244915	-0.0105841	0.00638086
-20	-7.6722e-12	-1.01822e-11	-3.67838e-12	1.19183e-12	5.38016e-11	-4.49378e-13	-6.45776e-12	-4.66583e-14	-1.87566e-12	-6.16564e-12	1.71301e-11		-20	-0.0040404	-0.0975852	-0.0142219	-0.0054944	0	-0.00371759	-0.00553799	-0.000746162	-0.00712868	0	0	-0.0125884	0.00859406
-10	-7.8762e-11	-8.82083e-11	-5.24977e-11	-4.78945e-11	3.63475e-11	-4.2857e-11	-4.56797e-11	-1.91346e-11	-2.41929e-11	-2.45664e-11	-4.2305e-11		-10	-0.083431	-0.355607	-0.169306	-0.102516	-0.0513498	-0.0700545	-0.0935181	-0.0361379	-0.0574806	-0.0778195	-0.063252	-0.105497	0.0271563
0	-5.03287e-10	-2.58075e-10	-2.25788e-10	-2.9261e-10	-7.33918e-11	-3.11458e-10	-2.53099e-10	-1.78459e-10	-1.79401e-10	-1.16397e-10	-3.82401e-10		0	-0.556895	-0.917301	-0.720455	-0.586932	-0.373239	-0.489007	-0.558306	-0.331296	-0.406696	-0.46375	-0.424981	-0.529896	0.0511149
10	-9.00244e-10	-2.83411e-10	-3.14283e-10	-5.01518e-10	-2.86911e-10	-6.3798e-10	-4.49577e-10	-5.33388e-10	-4.42153e-10	-2.42523e-10	-9.21703e-10		10	-1	-1	-1	-1	-1	-1	-1	-0.990712	-1	-1	-1	-0.999156	0.000844364
20	-6.98414e-10	-1.77302e-10	-2.29289e-10	-4.01138e-10	-2.38932e-10	-5.33802e-10	-3.67189e-10	-5.379e-10	-4.41364e-10	-2.23507e-10	-8.75354e-10		20	-0.774541	-0.649355	-0.729985	-0.800383	-0.859155	-0.837482	-0.813906	-1	-0.997744	-0.919774	-0.949952	-0.848389	0.0335098
30	-4.05154e-10	-6.0639e-11	-1.17338e-10	-2.48239e-10	-9.79513e-11	-3.2999e-10	-2.20044e-10	-3.52452e-10	-2.88179e-10	-1.22524e-10	-5.49628e-10		30	-0.447514	-0.264307	-0.3742	-0.497994	-0.445423	-0.518697	-0.484316	-0.654503	-0.65259	-0.493307	-0.603876	-0.494248	0.035076
40	-1.58048e-10	1.92851e-11	-3.26886e-11	-9.60561e-11	3.582e-11	-1.45354e-10	-9.57488e-11	-1.64629e-10	-1.32658e-10	-3.59935e-11	-2.4897e-10		40	-0.171829	0	-0.106408	-0.197779	-0.0528169	-0.229603	-0.205623	-0.307149	-0.302924	-0.125955	-0.283356	-0.180313	0.0305064
