# Supplementary material for: Molecular basis of the PIP2-dependent regulation of CaV2.2 channel and its modulation by CaV β subunits
Source: eLife. 2022 Nov 14;11:e69500. doi: 10.7554/eLife.69500 (PMC9662827; doi:10.7554/eLife.69500)
Supplement: Figure 2—source data 1. [file elife-69500-fig2-data1.xlsx]

## Sheet: Sheet1
Figure 2 - Source Data 1
Current inactivation (r100) and current inhibition (%) by PIP2 depletion in N-type CaV2.2 channels with the engineered β2 construct.
Figure2 B and C: Current inactivation (r100) in CaV2.2 channels with the engineered β2 construct
Statistical analysis from GraphPad Prism 7.0 (one-way ANOVA followed by Tukey post-hoc test)
Current inactivation (r100)	n_1	n_2	n_3	n_4	n_5	n_6	n_7	n_8	n_9	n_10	n_11	n_12	Average	SE
(ΔN)β2 WT	0.440401	0.476406	0.44101	0.520885	0.435405	0.429456	0.469431	0.395346	0.503639	0.474549			0.458653	0.0118442
(ΔN)β2 Mut	0.39	0.286565	0.241462	0.371156	0.267312	0.268072	0.309365	0.3131	0.298902				0.305104	0.0161951
Lyn-(ΔN)β2 WT	0.901896	0.982729	1.06117	0.985859	0.943312	1.0757	0.885832	1.00645	0.946816				0.97664	0.0216675
Lyn-(ΔN)β2 Mut	0.437539	0.468395	0.339236	0.415309	0.455853	0.362167	0.471609	0.329347	0.448543	0.285711	0.342721	0.366312	0.393562	0.0182618
Figure2 B and D: Current inhibition (%) by PIP2 depletion in CaV2.2 channels with the engineered β2 construct
Statistical analysis from GraphPad Prism 7.0 (one-way ANOVA followed by Tukey post-hoc test)
Current inhibition (%)	n_1	n_2	n_3	n_4	n_5	n_6	n_7	n_8	n_9	n_10	n_11	Average	SE
(ΔN)β2 WT	35.59	27.4155	34.3284	30.1618	25.3628	25.7765	45.9685	29.9237	31.7723	42.6405		32.894	2.18632
(ΔN)β2 Mut	30.5476	39.9911	30.6037	27.1173	32.32	33.631	32.9228	46.2967	35.4075	25.9535		33.4791	1.90339
Lyn-(ΔN)β2 WT	5.67709	9.67041	4.723	4.12652	3.60598	5.67786	2.04147	4.15044	2.51961			4.68804	0.747819
Lyn-(ΔN)β2 Mut	28.5972	31.3102	40.4057	36.3658	26.3928	32.7497	24.2269	23.1099	28.1243	32.5426	30.8345	30.4236	1.54498
