# Supplementary material for: Molecular basis of the PIP2-dependent regulation of CaV2.2 channel and its modulation by CaV β subunits
Source: eLife. 2022 Nov 14;11:e69500. doi: 10.7554/eLife.69500 (PMC9662827; doi:10.7554/eLife.69500)
Supplement: Figure 3—figure supplement 1—source data 1. [file elife-69500-fig3-figsupp1-data1.xlsx]

## Sheet: Sheet1
Figure 3 - figure supplement 1 - Source Data 1
Relative peak current amplitudes of CaV2.2 channels with chimeric Lyn-linker-β2c derivatives.
Figure3 - figure supplement 1: Relative peak current amplitudes of CaV2.2 channels with chimeric Lyn-linker-β2c derivatives
Statistical analysis from GraphPad Prism 7.0 (one-way ANOVA followed by Tukey post-hoc test)
Relative peak current amplitudes	n_1	n_2	n_3	n_4	n_5	n_6	n_7	Average	SE
Control	1.01754	1.03866	1.0019	0.9968	0.863946	0.876364		0.965868	0.0308886
RF	1.22727	1.2093	1.23529	1.29452	1.26974	1.14821	1.10294	1.21247	0.0253016
RCF	1.02793	0.84252	0.956738	1.01868	0.992349	0.98393	1.13226	0.993488	0.0328469
