# Supplementary material for: Molecular basis of the PIP2-dependent regulation of CaV2.2 channel and its modulation by CaV β subunits
Source: eLife. 2022 Nov 14;11:e69500. doi: 10.7554/eLife.69500 (PMC9662827; doi:10.7554/eLife.69500)
Supplement: Figure 3—source data 1. [file elife-69500-fig3-data1.xlsx]

## Sheet: Sheet1
Figure 3 - Source Data 1
Time courses of CaV2.2 currents and FRET ratio.
Figure3B: Time courses of CaV2.2 currents and FRET ratio
Control																				RF																RCF
Cont_1					Cont_2					Cont_3					Cont_4					RF_1					RF_2					RF_3						RCF_1					RCF_2					RCF_3
Time (s)	Current (nA)	Time (s)	FRETr		Time (s)	Current (nA)	Time (s)	FRETr		Time (s)	Current (nA)	Time (s)	FRETr		Time (s)	Current (nA)	Time (s)	FRETr		Time (s)	Current (nA)	Time (s)	FRETr		Time (s)	Current (nA)	Time (s)	FRETr		Time (s)	Current (nA)	Time (s)	FRETr			Time (s)	Current (nA)	Time (s)	FRETr		Time (s)	Current (nA)	Time (s)	FRETr		Time (s)	Current (nA)	Time (s)	FRETr
0	-1.69e-09	0	0.581		0	-5.16e-10	0	0.914		0	-3.62e-10	0	0.839		0	-3.39e-09	0	0.779		0	-1.34e-09	0	0.699		0	-2.71e-10	0	0.427		0	-1.33e-09	0	0.536			0	-1.63e-09	0	1.39		0	-4.03e-10	0	0.548		0	-5.05e-10	0	0.709
4	-1.71e-09	0.5	0.582		4	-5.22e-10	0.5	0.912		4	-3.7e-10	0.5	0.837		4	-3.39e-09	0.5	0.775		4	-1.35e-09	0.5	0.701		4	-2.74e-10	0.5	0.429		4	-1.31e-09	0.5	0.54			4	-1.7e-09	0.5	1.37		4	-4.67e-10	0.5	0.551		4	-4.79e-10	0.5	0.705
8	-1.71e-09	1	0.577		8	-5.38e-10	1	0.913		8	-3.71e-10	1	0.838		8	-3.43e-09	1	0.779		8	-1.35e-09	1	0.704		8	-2.64e-10	1	0.428		8	-1.31e-09	1	0.538			8	-1.71e-09	1	1.4		8	-4.29e-10	1	0.552		8	-4.99e-10	1	0.699
12	-1.72e-09	1.5	0.58		12	-5.28e-10	1.5	0.924		12	-3.41e-10	1.5	0.849		12	-3.41e-09	1.5	0.778		12	-1.36e-09	1.5	0.701		12	-2.74e-10	1.5	0.427		12	-1.33e-09	1.5	0.538			12	-1.71e-09	1.5	1.39		12	-3.93e-10	1.5	0.551		12	-5e-10	1.5	0.704
16	-1.71e-09	2	0.577		16	-5.26e-10	2	0.914		16	-3.51e-10	2	0.842		16	-3.43e-09	2	0.779		16	-1.35e-09	2	0.699		16	-2.82e-10	2	0.429		16	-1.34e-09	2	0.538			16	-1.72e-09	2	1.39		16	-4.65e-10	2	0.551		16	-5.01e-10	2	0.703
20	-1.72e-09	2.5	0.579		20	-5.27e-10	2.5	0.9		20	-3.48e-10	2.5	0.838		20	-3.42e-09	2.5	0.775		20	-1.35e-09	2.5	0.7		20	-2.83e-10	2.5	0.426		20	-1.35e-09	2.5	0.538			20	-1.72e-09	2.5	1.41		20	-5.01e-10	2.5	0.552		20	-5.02e-10	2.5	0.707
24	-1.74e-09	3	0.579		24	-5.43e-10	3	0.929		24	-3.41e-10	3	0.842		24	-3.42e-09	3	0.78		24	-1.35e-09	3	0.701		24	-2.79e-10	3	0.431		24	-1.36e-09	3	0.538			24	-1.72e-09	3	1.39		24	-4.58e-10	3	0.551		24	-5.15e-10	3	0.702
28	-1.76e-09	3.5	0.579		28	-5.32e-10	3.5	0.912		28	-3.73e-10	3.5	0.848		28	-3.41e-09	3.5	0.777		28	-1.34e-09	3.5	0.7		28	-2.79e-10	3.5	0.426		28	-1.39e-09	3.5	0.538			28	-1.7e-09	3.5	1.4		28	-4.11e-10	3.5	0.555		28	-5.13e-10	3.5	0.717
32	-1.75e-09	4	0.578		32	-5.29e-10	4	0.907		32	-3.51e-10	4	0.845		32	-3.39e-09	4	0.78		32	-1.36e-09	4	0.702		32	-2.76e-10	4	0.426		32	-1.38e-09	4	0.541			32	-1.7e-09	4	1.39		32	-4.39e-10	4	0.554		32	-5.16e-10	4	0.71
36	-1.74e-09	4.5	0.578		36	-5.32e-10	4.5	0.898		36	-3.69e-10	4.5	0.843		36	-3.39e-09	4.5	0.776		36	-1.34e-09	4.5	0.703		36	-2.68e-10	4.5	0.427		36	-1.4e-09	4.5	0.538			36	-1.71e-09	4.5	1.38		36	-4.46e-10	4.5	0.552		36	-5.18e-10	4.5	0.711
40	-1.73e-09	5	0.578		40	-5.32e-10	5	0.9		40	-3.66e-10	5	0.846		40	-3.35e-09	5	0.78		40	-1.34e-09	5	0.706		40	-2.71e-10	5	0.429		40	-1.4e-09	5	0.54			40	-1.69e-09	5	1.38		40	-4.08e-10	5	0.554		40	-4.97e-10	5	0.701
44	-1.71e-09	5.5	0.579		44	-5.25e-10	5.5	0.91		44	-3.64e-10	5.5	0.836		44	-3.35e-09	5.5	0.783		44	-1.32e-09	5.5	0.703		44	-2.72e-10	5.5	0.426		44	-1.41e-09	5.5	0.539			44	-1.62e-09	5.5	1.4		44	-4.01e-10	5.5	0.553		44	-5.13e-10	5.5	0.712
48	-1.71e-09	6	0.578		48	-5.34e-10	6	0.913		48	-3.7e-10	6	0.848		48	-3.25e-09	6	0.784		48	-1.33e-09	6	0.697		48	-2.86e-10	6	0.427		48	-1.42e-09	6	0.54			48	-1.64e-09	6	1.42		48	-4.05e-10	6	0.55		48	-5.26e-10	6	0.707
52	-1.69e-09	6.5	0.575		52	-5.33e-10	6.5	0.915		52	-3.63e-10	6.5	0.845		52	-3.19e-09	6.5	0.782		52	-1.34e-09	6.5	0.703		52	-2.89e-10	6.5	0.428		52	-1.45e-09	6.5	0.541			52	-1.72e-09	6.5	1.42		52	-4.2e-10	6.5	0.555		52	-5.34e-10	6.5	0.709
56	-1.71e-09	7	0.577		56	-5.28e-10	7	0.902		56	-3.65e-10	7	0.847		56	-2.99e-09	7	0.78		56	-1.36e-09	7	0.702		56	-3.17e-10	7	0.428		56	-1.43e-09	7	0.541			56	-1.74e-09	7	1.41		56	-4.09e-10	7	0.552		56	-5.22e-10	7	0.708
60	-1.72e-09	7.5	0.576		60	-5.52e-10	7.5	0.906		60	-3.88e-10	7.5	0.845		60	-2.96e-09	7.5	0.784		60	-1.36e-09	7.5	0.701		60	-3.01e-10	7.5	0.43		60	-1.46e-09	7.5	0.54			60	-1.79e-09	7.5	1.42		60	-4.57e-10	7.5	0.551		60	-5.13e-10	7.5	0.711
64	-1.73e-09	8	0.578		64	-5.47e-10	8	0.926		64	-3.65e-10	8	0.842		64	-2.94e-09	8	0.783		64	-1.39e-09	8	0.704		64	-2.9e-10	8	0.429		64	-1.46e-09	8	0.541			64	-1.72e-09	8	1.43		64	-3.97e-10	8	0.552		64	-5.09e-10	8	0.701
68	-1.73e-09	8.5	0.582		68	-5.44e-10	8.5	0.917		68	-3.93e-10	8.5	0.846		68	-2.9e-09	8.5	0.78		68	-1.47e-09	8.5	0.704		68	-2.85e-10	8.5	0.429		68	-1.47e-09	8.5	0.54			68	-1.71e-09	8.5	1.42		68	-4.11e-10	8.5	0.551		68	-5.51e-10	8.5	0.705
72	-1.71e-09	9	0.579		72	-5.49e-10	9	0.914		72	-3.91e-10	9	0.842		72	-2.9e-09	9	0.784		72	-1.53e-09	9	0.7		72	-2.85e-10	9	0.43		72	-1.46e-09	9	0.538			72	-1.67e-09	9	1.4		72	-4.02e-10	9	0.551		72	-5.29e-10	9	0.713
76	-1.72e-09	9.5	0.58		76	-5.61e-10	9.5	0.907		76	-4.08e-10	9.5	0.842		76	-2.88e-09	9.5	0.782		76	-1.57e-09	9.5	0.699		76	-2.96e-10	9.5	0.428		76	-1.42e-09	9.5	0.537			76	-1.69e-09	9.5	1.44		76	-3.92e-10	9.5	0.55		76	-5.23e-10	9.5	0.709
80	-1.7e-09	10	0.579		80	-5.55e-10	10	0.916		80	-3.87e-10	10	0.846		80	-2.86e-09	10	0.785		80	-1.61e-09	10	0.703		80	-2.86e-10	10	0.428		80	-1.53e-09	10	0.537			80	-1.71e-09	10	1.44		80	-3.92e-10	10	0.547		80	-5.04e-10	10	0.709
84	-1.71e-09	10.5	0.579		84	-5.53e-10	10.5	0.898		84	-4.09e-10	10.5	0.843		84	-2.87e-09	10.5	0.778		84	-1.64e-09	10.5	0.705		84	-3.19e-10	10.5	0.429		84	-1.61e-09	10.5	0.538			84	-1.73e-09	10.5	1.41		84	-4.06e-10	10.5	0.551		84	-5.17e-10	10.5	0.711
88	-1.71e-09	11	0.579		88	-5.49e-10	11	0.894		88	-3.9e-10	11	0.844		88	-2.87e-09	11	0.78		88	-1.64e-09	11	0.703		88	-3.14e-10	11	0.429		88	-1.67e-09	11	0.542			88	-1.71e-09	11	1.42		88	-3.86e-10	11	0.549		88	-5.16e-10	11	0.702
92	-1.71e-09	11.5	0.577		92	-5.65e-10	11.5	0.904		92	-3.98e-10	11.5	0.848		92	-2.88e-09	11.5	0.789		92	-1.63e-09	11.5	0.703		92	-3.17e-10	11.5	0.428		92	-1.67e-09	11.5	0.54			92	-1.76e-09	11.5	1.41		92	-3.63e-10	11.5	0.55		92	-5.35e-10	11.5	0.71
96	-1.73e-09	12	0.576		96	-5.69e-10	12	0.904		96	-4.17e-10	12	0.844		96	-2.89e-09	12	0.785		96	-1.64e-09	12	0.7		96	-3.11e-10	12	0.429		96	-1.7e-09	12	0.538			96	-1.76e-09	12	1.41		96	-3.75e-10	12	0.55		96	-5.34e-10	12	0.707
100	-1.74e-09	12.5	0.578		100	-5.65e-10	12.5	0.892		100	-4.03e-10	12.5	0.841		100	-2.88e-09	12.5	0.784		100	-1.62e-09	12.5	0.706		100	-3.24e-10	12.5	0.43		100	-1.73e-09	12.5	0.539			100	-1.78e-09	12.5	1.39		100	-3.65e-10	12.5	0.549		100	-5.34e-10	12.5	0.7
104	-1.74e-09	13	0.579		104	-5.69e-10	13	0.899		104	-4.23e-10	13	0.842		104	-2.89e-09	13	0.784		104	-1.65e-09	13	0.701		104	-3.21e-10	13	0.431		104	-1.75e-09	13	0.539			104	-1.78e-09	13	1.42		104	-3.9e-10	13	0.549		104	-5.21e-10	13	0.709
108	-1.76e-09	13.5	0.578		108	-5.76e-10	13.5	0.916		108	-4.06e-10	13.5	0.849		108	-2.88e-09	13.5	0.781		108	-1.67e-09	13.5	0.698		108	-3.27e-10	13.5	0.429		108	-1.74e-09	13.5	0.539			108	-1.78e-09	13.5	1.42		108	-3.88e-10	13.5	0.551		108	-5.27e-10	13.5	0.706
112	-1.75e-09	14	0.579		112	-5.58e-10	14	0.896		112	-4.15e-10	14	0.846		112	-2.88e-09	14	0.784		112	-1.65e-09	14	0.701		112	-3.29e-10	14	0.428		112	-1.77e-09	14	0.539			112	-1.8e-09	14	1.39		112	-3.68e-10	14	0.551		112	-5.31e-10	14	0.709
116	-1.77e-09	14.5	0.576		116	-5.73e-10	14.5	0.894		116	-4e-10	14.5	0.84		116	-2.87e-09	14.5	0.78		116	-1.65e-09	14.5	0.702		116	-3.41e-10	14.5	0.428		116	-1.81e-09	14.5	0.541			116	-1.83e-09	14.5	1.42		116	-4e-10	14.5	0.55		116	-5.27e-10	14.5	0.701
120	-1.76e-09	15	0.575		120	-5.72e-10	15	0.896		120	-4.08e-10	15	0.841		120	-2.85e-09	15	0.782		120	-1.68e-09	15	0.701		120	-3.43e-10	15	0.429		120	-1.83e-09	15	0.539			120	-1.83e-09	15	1.39		120	-3.91e-10	15	0.551		120	-5.18e-10	15	0.7
124	-1.76e-09	15.5	0.577		124	-5.81e-10	15.5	0.9		124	-4.04e-10	15.5	0.845		124	-2.86e-09	15.5	0.778		124	-1.64e-09	15.5	0.7		124	-3.51e-10	15.5	0.43		124	-1.83e-09	15.5	0.539			124	-1.82e-09	15.5	1.44		124	-4.06e-10	15.5	0.55		124	-5.15e-10	15.5	0.706
128	-1.75e-09	16	0.575		128	-5.9e-10	16	0.897		128	-4.21e-10	16	0.843		128	-2.88e-09	16	0.779		128	-1.66e-09	16	0.699		128	-3.45e-10	16	0.427		128	-1.84e-09	16	0.541			128	-1.84e-09	16	1.41		128	-3.94e-10	16	0.55		128	-5.31e-10	16	0.708
132	-1.76e-09	16.5	0.579		132	-5.97e-10	16.5	0.887		132	-4.1e-10	16.5	0.85		132	-2.9e-09	16.5	0.783		132	-1.65e-09	16.5	0.7		132	-3.59e-10	16.5	0.429		132	-1.87e-09	16.5	0.542			132	-1.85e-09	16.5	1.4		132	-3.99e-10	16.5	0.55		132	-5.41e-10	16.5	0.71
136	-1.74e-09	17	0.576		136	-5.75e-10	17	0.893		136	-4.19e-10	17	0.846		136	-2.88e-09	17	0.786		136	-1.68e-09	17	0.707		136	-3.47e-10	17	0.428		136	-1.85e-09	17	0.541			136	-1.84e-09	17	1.42		136	-4.04e-10	17	0.549		136	-5.45e-10	17	0.706
140	-1.76e-09	17.5	0.579		140	-5.79e-10	17.5	0.896		140	-4.07e-10	17.5	0.848		140	-2.9e-09	17.5	0.785		140	-1.68e-09	17.5	0.702		140	-3.55e-10	17.5	0.429		140	-1.86e-09	17.5	0.54			140	-1.84e-09	17.5	1.4		140	-4.02e-10	17.5	0.549		140	-5.35e-10	17.5	0.71
144	-1.75e-09	18	0.575		144	-5.83e-10	18	0.901		144	-4.46e-10	18	0.845		144	-2.89e-09	18	0.782		144	-1.68e-09	18	0.701		144	-3.31e-10	18	0.429		144	-1.9e-09	18	0.541			144	-1.84e-09	18	1.4		144	-3.99e-10	18	0.551		144	-5.53e-10	18	0.712
148	-1.74e-09	18.5	0.577		148	-5.79e-10	18.5	0.889		148	-4.18e-10	18.5	0.849		148	-2.85e-09	18.5	0.787		148	-1.67e-09	18.5	0.7		148	-3.42e-10	18.5	0.43		148	-1.89e-09	18.5	0.54			148	-1.86e-09	18.5	1.4		148	-4.05e-10	18.5	0.549		148	-5.37e-10	18.5	0.702
152	-1.74e-09	19	0.578		152	-5.94e-10	19	0.9		152	-4.36e-10	19	0.843		152	-2.85e-09	19	0.781		152	-1.69e-09	19	0.705		152	-3.4e-10	19	0.43		152	-1.89e-09	19	0.54			152	-1.88e-09	19	1.43		152	-4.14e-10	19	0.549		152	-5.3e-10	19	0.705
156	-1.75e-09	19.5	0.578		156	-6.16e-10	19.5	0.891		156	-4.44e-10	19.5	0.85		156	-2.87e-09	19.5	0.784		156	-1.71e-09	19.5	0.703		156	-3.45e-10	19.5	0.426		156	-1.88e-09	19.5	0.539			156	-1.89e-09	19.5	1.41		156	-4.29e-10	19.5	0.551		156	-5.32e-10	19.5	0.707
160	-1.71e-09	20	0.578		160	-6.33e-10	20	0.903		160	-4.28e-10	20	0.852		160	-2.85e-09	20	0.788		160	-1.71e-09	20	0.7		160	-3.64e-10	20	0.427		160	-1.89e-09	20	0.54			160	-1.88e-09	20	1.41		160	-4.39e-10	20	0.552		160	-5.47e-10	20	0.706
164	-1.7e-09	20.5	0.577		164	-6.33e-10	20.5	0.901		164	-4.43e-10	20.5	0.848		164	-2.84e-09	20.5	0.784		164	-1.74e-09	20.5	0.701		164	-3.66e-10	20.5	0.429		164	-1.88e-09	20.5	0.539			164	-1.91e-09	20.5	1.41		164	-4.41e-10	20.5	0.55		164	-5.39e-10	20.5	0.701
168	-1.71e-09	21	0.576		168	-5.91e-10	21	0.894		168	-4.54e-10	21	0.844		168	-2.81e-09	21	0.785		168	-1.72e-09	21	0.706		168	-3.68e-10	21	0.428		168	-1.89e-09	21	0.54			168	-1.9e-09	21	1.41		168	-4.45e-10	21	0.549		168	-5.52e-10	21	0.7
172	-1.69e-09	21.5	0.58		172	-5.83e-10	21.5	0.901		172	-4.39e-10	21.5	0.85		172	-2.85e-09	21.5	0.78		172	-1.73e-09	21.5	0.705		172	-3.65e-10	21.5	0.431		172	-1.9e-09	21.5	0.541			172	-1.92e-09	21.5	1.41		172	-4.18e-10	21.5	0.55		172	-5.4e-10	21.5	0.707
176	-1.7e-09	22	0.577		176	-5.99e-10	22	0.889		176	-4.39e-10	22	0.846		176	-2.83e-09	22	0.777		176	-1.71e-09	22	0.703		176	-3.67e-10	22	0.429		176	-1.93e-09	22	0.54			176	-1.92e-09	22	1.4		176	-4.16e-10	22	0.55		176	-5.7e-10	22	0.705
180	-1.67e-09	22.5	0.576		180	-6.21e-10	22.5	0.889		180	-4.56e-10	22.5	0.848		180	-2.82e-09	22.5	0.777		180	-1.69e-09	22.5	0.705		180	-3.47e-10	22.5	0.429		180	-1.95e-09	22.5	0.542			180	-1.89e-09	22.5	1.4		180	-4.44e-10	22.5	0.552		180	-5.59e-10	22.5	0.711
184	-1.68e-09	23	0.575		184	-6.19e-10	23	0.901		184	-4.4e-10	23	0.853		184	-2.82e-09	23	0.776		184	-1.68e-09	23	0.704		184	-3.47e-10	23	0.428		184	-1.94e-09	23	0.539			184	-1.94e-09	23	1.42		184	-4.42e-10	23	0.551		184	-5.56e-10	23	0.703
188	-1.67e-09	23.5	0.576		188	-6.11e-10	23.5	0.889		188	-4.56e-10	23.5	0.849		188	-2.81e-09	23.5	0.777		188	-1.69e-09	23.5	0.703		188	-3.46e-10	23.5	0.429		188	-1.93e-09	23.5	0.537			188	-1.95e-09	23.5	1.4		188	-4.66e-10	23.5	0.55		188	-5.6e-10	23.5	0.705
192	-1.67e-09	24	0.578		192	-6.01e-10	24	0.899		192	-4.45e-10	24	0.851		192	-2.82e-09	24	0.779		192	-1.7e-09	24	0.703		192	-3.5e-10	24	0.428		192	-1.94e-09	24	0.539			192	-1.94e-09	24	1.42		192	-4.38e-10	24	0.549		192	-5.79e-10	24	0.705
196	-1.66e-09	24.5	0.573		196	-5.93e-10	24.5	0.913		196	-4.44e-10	24.5	0.852		196	-2.81e-09	24.5	0.779		196	-1.73e-09	24.5	0.705		196	-3.51e-10	24.5	0.429		196	-1.95e-09	24.5	0.542			196	-1.95e-09	24.5	1.41		196	-4.56e-10	24.5	0.55		196	-5.59e-10	24.5	0.709
200	-1.64e-09	25	0.577		200	-5.89e-10	25	0.902		200	-4.46e-10	25	0.853		200	-2.8e-09	25	0.781		200	-1.71e-09	25	0.702		200	-3.53e-10	25	0.429		200	-1.98e-09	25	0.539			200	-1.94e-09	25	1.4		200	-4.3e-10	25	0.55		200	-5.86e-10	25	0.701
204	-1.64e-09	25.5	0.576		204	-5.94e-10	25.5	0.915		204	-4.64e-10	25.5	0.859		204	-2.8e-09	25.5	0.779		204	-1.72e-09	25.5	0.709		204	-3.54e-10	25.5	0.429		204	-2e-09	25.5	0.542			204	-1.93e-09	25.5	1.38		204	-4.39e-10	25.5	0.552		204	-5.49e-10	25.5	0.709
208	-1.62e-09	26	0.576		208	-5.91e-10	26	0.91		208	-4.54e-10	26	0.853		208	-2.8e-09	26	0.783		208	-1.7e-09	26	0.706		208	-3.62e-10	26	0.428		208	-1.97e-09	26	0.538			208	-1.97e-09	26	1.4		208	-4.52e-10	26	0.549		208	-5.57e-10	26	0.701
212	-1.6e-09	26.5	0.578		212	-5.9e-10	26.5	0.903		212	-4.63e-10	26.5	0.857		212	-2.8e-09	26.5	0.78		212	-1.74e-09	26.5	0.703		212	-3.8e-10	26.5	0.431		212	-1.96e-09	26.5	0.541			212	-1.91e-09	26.5	1.39		212	-4.41e-10	26.5	0.549		212	-5.76e-10	26.5	0.711
216	-1.59e-09	27	0.578		216	-5.94e-10	27	0.903		216	-4.43e-10	27	0.859		216	-2.78e-09	27	0.781		216	-1.72e-09	27	0.7		216	-3.8e-10	27	0.428		216	-1.96e-09	27	0.539			216	-1.94e-09	27	1.41		216	-4.44e-10	27	0.549		216	-5.62e-10	27	0.707
220	-1.59e-09	27.5	0.575		220	-5.85e-10	27.5	0.909		220	-4.39e-10	27.5	0.856		220	-2.77e-09	27.5	0.787		220	-1.73e-09	27.5	0.705		220	-3.7e-10	27.5	0.429		220	-1.96e-09	27.5	0.539			220	-1.9e-09	27.5	1.4		220	-4.33e-10	27.5	0.55		220	-5.6e-10	27.5	0.71
224	-1.58e-09	28	0.577		224	-5.79e-10	28	0.903		224	-4.55e-10	28	0.855		224	-2.8e-09	28	0.784		224	-1.68e-09	28	0.706		224	-3.65e-10	28	0.428		224	-1.98e-09	28	0.54			224	-1.91e-09	28	1.42		224	-4.56e-10	28	0.549		224	-5.29e-10	28	0.703
228	-1.57e-09	28.5	0.571		228	-5.75e-10	28.5	0.915		228	-4.48e-10	28.5	0.858		228	-2.94e-09	28.5	0.781		228	-1.73e-09	28.5	0.7		228	-3.75e-10	28.5	0.427		228	-1.99e-09	28.5	0.54			228	-1.88e-09	28.5	1.39		228	-4.73e-10	28.5	0.549		228	-5.39e-10	28.5	0.702
232	-1.59e-09	29	0.579		232	-5.81e-10	29	0.901		232	-4.49e-10	29	0.85		232	-2.93e-09	29	0.781		232	-1.72e-09	29	0.707		232	-3.67e-10	29	0.427		232	-2e-09	29	0.54			232	-1.89e-09	29	1.41		232	-4.66e-10	29	0.55		232	-5.54e-10	29	0.704
236	-1.55e-09	29.5	0.579		236	-5.84e-10	29.5	0.907		236	-4.36e-10	29.5	0.854		236	-2.98e-09	29.5	0.779		236	-1.73e-09	29.5	0.699		236	-3.7e-10	29.5	0.429		236	-2.01e-09	29.5	0.538			236	-1.88e-09	29.5	1.4		236	-4.66e-10	29.5	0.548		236	-5.49e-10	29.5	0.704
240	-1.56e-09	30	0.578		240	-5.73e-10	30	0.906		240	-4.37e-10	30	0.855		240	-3e-09	30	0.782		240	-1.73e-09	30	0.704		240	-3.71e-10	30	0.427		240	-2.01e-09	30	0.54			240	-1.9e-09	30	1.4		240	-4.6e-10	30	0.548		240	-5.81e-10	30	0.711
244	-1.56e-09	30.5	0.576		244	-5.79e-10	30.5	0.898		244	-4.86e-10	30.5	0.847		244	-3e-09	30.5	0.773		244	-1.8e-09	30.5	0.698		244	-3.63e-10	30.5	0.43		244	-2.03e-09	30.5	0.537			244	-1.9e-09	30.5	1.42		244	-4.32e-10	30.5	0.55		244	-5.64e-10	30.5	0.707
248	-1.63e-09	31	0.576		248	-5.75e-10	31	0.912		248	-4.67e-10	31	0.851		248	-2.99e-09	31	0.782		248	-1.83e-09	31	0.699		248	-4.16e-10	31	0.427		248	-2.03e-09	31	0.539			248	-2e-09	31	1.39		248	-4.76e-10	31	0.549		248	-5.74e-10	31	0.706
252	-1.62e-09	31.5	0.575		252	-5.78e-10	31.5	0.893		252	-5.03e-10	31.5	0.846		252	-3.01e-09	31.5	0.789		252	-1.8e-09	31.5	0.704		252	-3.86e-10	31.5	0.428		252	-2e-09	31.5	0.54			252	-2.01e-09	31.5	1.4		252	-4.57e-10	31.5	0.548		252	-5.97e-10	31.5	0.706
256	-1.61e-09	32	0.574		256	-5.7e-10	32	0.903		256	-4.84e-10	32	0.845		256	-3.01e-09	32	0.784		256	-1.82e-09	32	0.703		256	-4.12e-10	32	0.426		256	-2.02e-09	32	0.541			256	-2.04e-09	32	1.42		256	-4.67e-10	32	0.549		256	-5.95e-10	32	0.696
260	-1.6e-09	32.5	0.577		260	-5.69e-10	32.5	0.9		260	-4.82e-10	32.5	0.851		260	-3.03e-09	32.5	0.784		260	-1.82e-09	32.5	0.702		260	-3.92e-10	32.5	0.429		260	-2.12e-09	32.5	0.54			260	-2.06e-09	32.5	1.42		260	-4.45e-10	32.5	0.548		260	-5.98e-10	32.5	0.702
264	-1.59e-09	33	0.574		264	-5.74e-10	33	0.908		264	-4.81e-10	33	0.845		264	-3e-09	33	0.788		264	-1.83e-09	33	0.705		264	-4.13e-10	33	0.429		264	-2.1e-09	33	0.539			264	-2.05e-09	33	1.44		264	-4.47e-10	33	0.551		264	-5.89e-10	33	0.708
268	-1.58e-09	33.5	0.577		268	-5.68e-10	33.5	0.906		268	-4.56e-10	33.5	0.85		268	-3.02e-09	33.5	0.786		268	-1.8e-09	33.5	0.699		268	-4.12e-10	33.5	0.427		268	-2.07e-09	33.5	0.54			268	-2.06e-09	33.5	1.42		268	-4.77e-10	33.5	0.547		268	-5.87e-10	33.5	0.701
272	-1.58e-09	34	0.577		272	-5.69e-10	34	0.893		272	-4.68e-10	34	0.841		272	-2.99e-09	34	0.784		272	-1.82e-09	34	0.699		272	-4.09e-10	34	0.429		272	-2.06e-09	34	0.541			272	-2.06e-09	34	1.44		272	-4.35e-10	34	0.549		272	-5.9e-10	34	0.704
276	-1.58e-09	34.5	0.576		276	-5.65e-10	34.5	0.899		276	-4.62e-10	34.5	0.85		276	-3.01e-09	34.5	0.779		276	-1.83e-09	34.5	0.7		276	-4e-10	34.5	0.429		276	-2.07e-09	34.5	0.539			276	-2.04e-09	34.5	1.41		276	-4.37e-10	34.5	0.549		276	-6.02e-10	34.5	0.701
280	-1.56e-09	35	0.576		280	-5.63e-10	35	0.892		280	-4.74e-10	35	0.841		280	-3.02e-09	35	0.787		280	-1.84e-09	35	0.699		280	-4.11e-10	35	0.429		280	-2.02e-09	35	0.54			280	-2.1e-09	35	1.4		280	-4.68e-10	35	0.55		280	-5.9e-10	35	0.706
284	-1.56e-09	35.5	0.575		284	-5.49e-10	35.5	0.899		284	-4.73e-10	35.5	0.846		284	-3.15e-09	35.5	0.786		284	-1.85e-09	35.5	0.704		284	-4.14e-10	35.5	0.428		284	-2.01e-09	35.5	0.541			284	-2.1e-09	35.5	1.38		284	-4.66e-10	35.5	0.548		284	-5.73e-10	35.5	0.698
288	-1.56e-09	36	0.574		288	-5.43e-10	36	0.897		288	-4.64e-10	36	0.84		288	-3.2e-09	36	0.779		288	-1.84e-09	36	0.7		288	-4.13e-10	36	0.428		288	-2.04e-09	36	0.54			288	-2.11e-09	36	1.45		288	-4.74e-10	36	0.55		288	-5.89e-10	36	0.707
292	-1.57e-09	36.5	0.578		292	-5.48e-10	36.5	0.893		292	-4.43e-10	36.5	0.843		292	-2.99e-09	36.5	0.781		292	-1.86e-09	36.5	0.703		292	-4.32e-10	36.5	0.428		292	-2.03e-09	36.5	0.537			292	-2.03e-09	36.5	1.38		292	-4.82e-10	36.5	0.547		292	-5.92e-10	36.5	0.697
296	-1.57e-09	37	0.574		296	-5.36e-10	37	0.896		296	-4.6e-10	37	0.844		296	-3e-09	37	0.779		296	-1.84e-09	37	0.701		296	-4.33e-10	37	0.429		296	-2.06e-09	37	0.539			296	-2.06e-09	37	1.43		296	-4.85e-10	37	0.548		296	-6.04e-10	37	0.704
300	-1.55e-09	37.5	0.577		300	-5.37e-10	37.5	0.895		300	-4.38e-10	37.5	0.843		300	-3.01e-09	37.5	0.777		300	-1.85e-09	37.5	0.707		300	-4.29e-10	37.5	0.426		300	-2.05e-09	37.5	0.538			300	-2.05e-09	37.5	1.41		300	-4.84e-10	37.5	0.549		300	-6.09e-10	37.5	0.704
		38	0.573				38	0.886				38	0.838				38	0.78				38	0.699				38	0.427				38	0.539					38	1.42				38	0.547				38	0.697
		38.5	0.577				38.5	0.898				38.5	0.838				38.5	0.779				38.5	0.698				38.5	0.427				38.5	0.537					38.5	1.4				38.5	0.547				38.5	0.704
		39	0.576				39	0.898				39	0.844				39	0.788				39	0.702				39	0.428				39	0.541					39	1.4				39	0.551				39	0.712
		39.5	0.577				39.5	0.896				39.5	0.844				39.5	0.781				39.5	0.7				39.5	0.426				39.5	0.54					39.5	1.4				39.5	0.55				39.5	0.699
		40	0.574				40	0.899				40	0.839				40	0.781				40	0.704				40	0.426				40	0.537					40	1.41				40	0.549				40	0.705
		40.5	0.575				40.5	0.896				40.5	0.842				40.5	0.781				40.5	0.701				40.5	0.429				40.5	0.54					40.5	1.41				40.5	0.548				40.5	0.702
		41	0.572				41	0.897				41	0.844				41	0.782				41	0.697				41	0.429				41	0.54					41	1.43				41	0.548				41	0.699
		41.5	0.579				41.5	0.896				41.5	0.847				41.5	0.78				41.5	0.702				41.5	0.428				41.5	0.54					41.5	1.43				41.5	0.548				41.5	0.701
		42	0.576				42	0.884				42	0.849				42	0.783				42	0.703				42	0.428				42	0.54					42	1.43				42	0.547				42	0.71
		42.5	0.575				42.5	0.912				42.5	0.843				42.5	0.779				42.5	0.701				42.5	0.427				42.5	0.54					42.5	1.42				42.5	0.547				42.5	0.71
		43	0.577				43	0.895				43	0.85				43	0.78				43	0.699				43	0.428				43	0.54					43	1.42				43	0.547				43	0.703
		43.5	0.575				43.5	0.907				43.5	0.852				43.5	0.776				43.5	0.7				43.5	0.428				43.5	0.54					43.5	1.41				43.5	0.547				43.5	0.698
		44	0.576				44	0.889				44	0.856				44	0.781				44	0.702				44	0.428				44	0.54					44	1.41				44	0.549				44	0.7
		44.5	0.578				44.5	0.909				44.5	0.853				44.5	0.773				44.5	0.703				44.5	0.429				44.5	0.54					44.5	1.41				44.5	0.547				44.5	0.709
		45	0.574				45	0.895				45	0.853				45	0.779				45	0.7				45	0.429				45	0.538					45	1.41				45	0.548				45	0.705
		45.5	0.574				45.5	0.894				45.5	0.86				45.5	0.777				45.5	0.705				45.5	0.428				45.5	0.54					45.5	1.39				45.5	0.55				45.5	0.708
		46	0.574				46	0.9				46	0.852				46	0.777				46	0.708				46	0.428				46	0.543					46	1.42				46	0.547				46	0.7
		46.5	0.576				46.5	0.906				46.5	0.851				46.5	0.78				46.5	0.703				46.5	0.429				46.5	0.541					46.5	1.41				46.5	0.55				46.5	0.7
		47	0.575				47	0.891				47	0.848				47	0.779				47	0.699				47	0.426				47	0.537					47	1.42				47	0.551				47	0.705
		47.5	0.581				47.5	0.904				47.5	0.853				47.5	0.775				47.5	0.702				47.5	0.43				47.5	0.541					47.5	1.41				47.5	0.548				47.5	0.704
		48	0.576				48	0.886				48	0.852				48	0.776				48	0.704				48	0.428				48	0.539					48	1.42				48	0.547				48	0.701
		48.5	0.579				48.5	0.901				48.5	0.853				48.5	0.775				48.5	0.697				48.5	0.429				48.5	0.542					48.5	1.42				48.5	0.548				48.5	0.699
		49	0.577				49	0.908				49	0.843				49	0.773				49	0.703				49	0.43				49	0.539					49	1.43				49	0.548				49	0.7
		49.5	0.577				49.5	0.894				49.5	0.848				49.5	0.777				49.5	0.702				49.5	0.43				49.5	0.541					49.5	1.43				49.5	0.547				49.5	0.702
		50	0.577				50	0.893				50	0.848				50	0.773				50	0.702				50	0.429				50	0.54					50	1.4				50	0.547				50	0.705
		50.5	0.57				50.5	0.9				50.5	0.843				50.5	0.78				50.5	0.7				50.5	0.427				50.5	0.541					50.5	1.41				50.5	0.547				50.5	0.699
		51	0.575				51	0.898				51	0.838				51	0.776				51	0.702				51	0.427				51	0.542					51	1.4				51	0.548				51	0.7
		51.5	0.578				51.5	0.907				51.5	0.847				51.5	0.784				51.5	0.703				51.5	0.429				51.5	0.543					51.5	1.44				51.5	0.548				51.5	0.7
		52	0.573				52	0.896				52	0.837				52	0.777				52	0.701				52	0.427				52	0.538					52	1.4				52	0.546				52	0.702
		52.5	0.574				52.5	0.89				52.5	0.846				52.5	0.777				52.5	0.701				52.5	0.43				52.5	0.541					52.5	1.42				52.5	0.549				52.5	0.701
		53	0.578				53	0.91				53	0.842				53	0.78				53	0.703				53	0.427				53	0.54					53	1.41				53	0.548				53	0.699
		53.5	0.573				53.5	0.911				53.5	0.845				53.5	0.782				53.5	0.705				53.5	0.428				53.5	0.54					53.5	1.42				53.5	0.55				53.5	0.701
		54	0.572				54	0.904				54	0.85				54	0.779				54	0.704				54	0.428				54	0.539					54	1.44				54	0.545				54	0.7
		54.5	0.576				54.5	0.908				54.5	0.849				54.5	0.779				54.5	0.7				54.5	0.427				54.5	0.541					54.5	1.42				54.5	0.545				54.5	0.705
		55	0.571				55	0.897				55	0.844				55	0.782				55	0.702				55	0.428				55	0.541					55	1.42				55	0.546				55	0.702
		55.5	0.574				55.5	0.895				55.5	0.844				55.5	0.778				55.5	0.704				55.5	0.429				55.5	0.541					55.5	1.43				55.5	0.549				55.5	0.696
		56	0.574				56	0.9				56	0.845				56	0.786				56	0.701				56	0.429				56	0.54					56	1.4				56	0.547				56	0.698
		56.5	0.574				56.5	0.899				56.5	0.846				56.5	0.78				56.5	0.698				56.5	0.426				56.5	0.541					56.5	1.4				56.5	0.547				56.5	0.703
		57	0.575				57	0.914				57	0.846				57	0.78				57	0.698				57	0.429				57	0.541					57	1.43				57	0.546				57	0.699
		57.5	0.573				57.5	0.9				57.5	0.844				57.5	0.786				57.5	0.701				57.5	0.429				57.5	0.541					57.5	1.4				57.5	0.546				57.5	0.701
		58	0.572				58	0.905				58	0.837				58	0.777				58	0.7				58	0.427				58	0.54					58	1.4				58	0.548				58	0.706
		58.5	0.572				58.5	0.9				58.5	0.847				58.5	0.78				58.5	0.7				58.5	0.43				58.5	0.542					58.5	1.4				58.5	0.546				58.5	0.7
		59	0.572				59	0.899				59	0.847				59	0.781				59	0.703				59	0.43				59	0.539					59	1.39				59	0.549				59	0.701
		59.5	0.573				59.5	0.896				59.5	0.834				59.5	0.779				59.5	0.701				59.5	0.43				59.5	0.538					59.5	1.42				59.5	0.549				59.5	0.701
		60	0.574				60	0.902				60	0.835				60	0.782				60	0.699				60	0.429				60	0.54					60	1.43				60	0.549				60	0.7
		60.5	0.573				60.5	0.9				60.5	0.832				60.5	0.78				60.5	0.701				60.5	0.431				60.5	0.539					60.5	1.41				60.5	0.548				60.5	0.693
		61	0.573				61	0.897				61	0.824				61	0.784				61	0.703				61	0.427				61	0.539					61	1.42				61	0.546				61	0.695
		61.5	0.573				61.5	0.897				61.5	0.836				61.5	0.789				61.5	0.699				61.5	0.427				61.5	0.54					61.5	1.39				61.5	0.546				61.5	0.695
		62	0.572				62	0.901				62	0.829				62	0.784				62	0.702				62	0.43				62	0.539					62	1.4				62	0.545				62	0.7
		62.5	0.57				62.5	0.911				62.5	0.827				62.5	0.778				62.5	0.7				62.5	0.429				62.5	0.541					62.5	1.4				62.5	0.547				62.5	0.697
		63	0.572				63	0.932				63	0.828				63	0.784				63	0.702				63	0.429				63	0.544					63	1.39				63	0.546				63	0.7
		63.5	0.573				63.5	0.931				63.5	0.831				63.5	0.781				63.5	0.705				63.5	0.431				63.5	0.543					63.5	1.37				63.5	0.546				63.5	0.694
		64	0.572				64	0.926				64	0.826				64	0.788				64	0.702				64	0.428				64	0.538					64	1.43				64	0.547				64	0.704
		64.5	0.57				64.5	0.922				64.5	0.834				64.5	0.786				64.5	0.7				64.5	0.429				64.5	0.54					64.5	1.42				64.5	0.549				64.5	0.695
		65	0.573				65	0.917				65	0.826				65	0.787				65	0.703				65	0.43				65	0.541					65	1.41				65	0.548				65	0.695
		65.5	0.573				65.5	0.924				65.5	0.83				65.5	0.79				65.5	0.712				65.5	0.43				65.5	0.542					65.5	1.43				65.5	0.548				65.5	0.695
		66	0.571				66	0.919				66	0.828				66	0.794				66	0.709				66	0.431				66	0.54					66	1.45				66	0.545				66	0.694
		66.5	0.57				66.5	0.914				66.5	0.828				66.5	0.789				66.5	0.711				66.5	0.431				66.5	0.54					66.5	1.44				66.5	0.546				66.5	0.701
		67	0.569				67	0.926				67	0.827				67	0.783				67	0.713				67	0.432				67	0.542					67	1.45				67	0.547				67	0.696
		67.5	0.57				67.5	0.916				67.5	0.828				67.5	0.787				67.5	0.712				67.5	0.434				67.5	0.54					67.5	1.42				67.5	0.546				67.5	0.7
		68	0.571				68	0.922				68	0.829				68	0.783				68	0.715				68	0.434				68	0.539					68	1.43				68	0.549				68	0.691
		68.5	0.572				68.5	0.935				68.5	0.834				68.5	0.787				68.5	0.713				68.5	0.436				68.5	0.541					68.5	1.47				68.5	0.549				68.5	0.695
		69	0.569				69	0.928				69	0.832				69	0.792				69	0.725				69	0.434				69	0.539					69	1.46				69	0.548				69	0.69
		69.5	0.571				69.5	0.91				69.5	0.831				69.5	0.787				69.5	0.724				69.5	0.433				69.5	0.536					69.5	1.46				69.5	0.547				69.5	0.698
		70	0.567				70	0.912				70	0.831				70	0.791				70	0.722				70	0.438				70	0.541					70	1.46				70	0.547				70	0.701
		70.5	0.574				70.5	0.929				70.5	0.837				70.5	0.788				70.5	0.721				70.5	0.434				70.5	0.539					70.5	1.47				70.5	0.546				70.5	0.692
		71	0.571				71	0.923				71	0.831				71	0.788				71	0.726				71	0.435				71	0.538					71	1.46				71	0.546				71	0.694
		71.5	0.568				71.5	0.923				71.5	0.831				71.5	0.793				71.5	0.727				71.5	0.436				71.5	0.539					71.5	1.48				71.5	0.546				71.5	0.701
		72	0.57				72	0.924				72	0.833				72	0.787				72	0.732				72	0.436				72	0.54					72	1.45				72	0.545				72	0.7
		72.5	0.571				72.5	0.917				72.5	0.835				72.5	0.793				72.5	0.73				72.5	0.437				72.5	0.542					72.5	1.46				72.5	0.545				72.5	0.698
		73	0.569				73	0.916				73	0.831				73	0.788				73	0.729				73	0.44				73	0.54					73	1.46				73	0.549				73	0.694
		73.5	0.566				73.5	0.91				73.5	0.841				73.5	0.791				73.5	0.729				73.5	0.434				73.5	0.541					73.5	1.47				73.5	0.546				73.5	0.699
		74	0.57				74	0.924				74	0.839				74	0.79				74	0.729				74	0.435				74	0.543					74	1.49				74	0.548				74	0.695
		74.5	0.57				74.5	0.918				74.5	0.84				74.5	0.785				74.5	0.727				74.5	0.435				74.5	0.539					74.5	1.44				74.5	0.546				74.5	0.703
		75	0.568				75	0.922				75	0.832				75	0.787				75	0.728				75	0.433				75	0.541					75	1.48				75	0.547				75	0.699
		75.5	0.57				75.5	0.907				75.5	0.84				75.5	0.793				75.5	0.729				75.5	0.437				75.5	0.541					75.5	1.46				75.5	0.547				75.5	0.7
		76	0.567				76	0.93				76	0.83				76	0.793				76	0.729				76	0.436				76	0.539					76	1.46				76	0.547				76	0.69
		76.5	0.565				76.5	0.913				76.5	0.835				76.5	0.788				76.5	0.727				76.5	0.438				76.5	0.542					76.5	1.46				76.5	0.546				76.5	0.692
		77	0.569				77	0.92				77	0.832				77	0.789				77	0.734				77	0.44				77	0.539					77	1.48				77	0.547				77	0.697
		77.5	0.572				77.5	0.916				77.5	0.835				77.5	0.79				77.5	0.734				77.5	0.434				77.5	0.541					77.5	1.46				77.5	0.546				77.5	0.692
		78	0.566				78	0.934				78	0.839				78	0.791				78	0.731				78	0.437				78	0.538					78	1.48				78	0.546				78	0.699
		78.5	0.569				78.5	0.931				78.5	0.839				78.5	0.795				78.5	0.741				78.5	0.436				78.5	0.541					78.5	1.47				78.5	0.544				78.5	0.704
		79	0.57				79	0.933				79	0.836				79	0.792				79	0.737				79	0.437				79	0.542					79	1.49				79	0.547				79	0.699
		79.5	0.57				79.5	0.937				79.5	0.833				79.5	0.794				79.5	0.734				79.5	0.437				79.5	0.538					79.5	1.49				79.5	0.547				79.5	0.702
		80	0.567				80	0.92				80	0.837				80	0.792				80	0.735				80	0.437				80	0.544					80	1.48				80	0.547				80	0.704
		80.5	0.567				80.5	0.91				80.5	0.831				80.5	0.793				80.5	0.744				80.5	0.437				80.5	0.544					80.5	1.47				80.5	0.545				80.5	0.692
		81	0.568				81	0.93				81	0.832				81	0.795				81	0.733				81	0.437				81	0.537					81	1.47				81	0.546				81	0.694
		81.5	0.567				81.5	0.916				81.5	0.836				81.5	0.789				81.5	0.739				81.5	0.438				81.5	0.54					81.5	1.49				81.5	0.544				81.5	0.698
		82	0.571				82	0.918				82	0.835				82	0.791				82	0.735				82	0.44				82	0.537					82	1.47				82	0.544				82	0.698
		82.5	0.57				82.5	0.924				82.5	0.834				82.5	0.787				82.5	0.742				82.5	0.441				82.5	0.537					82.5	1.47				82.5	0.545				82.5	0.7
		83	0.57				83	0.925				83	0.835				83	0.788				83	0.739				83	0.439				83	0.539					83	1.47				83	0.544				83	0.691
		83.5	0.569				83.5	0.919				83.5	0.84				83.5	0.79				83.5	0.735				83.5	0.437				83.5	0.537					83.5	1.43				83.5	0.545				83.5	0.693
		84	0.57				84	0.91				84	0.84				84	0.798				84	0.734				84	0.436				84	0.54					84	1.47				84	0.544				84	0.702
		84.5	0.569				84.5	0.932				84.5	0.831				84.5	0.789				84.5	0.735				84.5	0.44				84.5	0.54					84.5	1.46				84.5	0.543				84.5	0.696
		85	0.573				85	0.924				85	0.835				85	0.788				85	0.734				85	0.437				85	0.538					85	1.47				85	0.542				85	0.693
		85.5	0.572				85.5	0.921				85.5	0.831				85.5	0.788				85.5	0.74				85.5	0.437				85.5	0.541					85.5	1.49				85.5	0.547				85.5	0.695
		86	0.573				86	0.921				86	0.829				86	0.79				86	0.737				86	0.436				86	0.54					86	1.47				86	0.547				86	0.694
		86.5	0.576				86.5	0.915				86.5	0.827				86.5	0.79				86.5	0.736				86.5	0.438				86.5	0.54					86.5	1.48				86.5	0.545				86.5	0.693
		87	0.574				87	0.926				87	0.833				87	0.789				87	0.735				87	0.439				87	0.538					87	1.47				87	0.544				87	0.695
		87.5	0.574				87.5	0.924				87.5	0.834				87.5	0.786				87.5	0.743				87.5	0.437				87.5	0.537					87.5	1.48				87.5	0.544				87.5	0.693
		88	0.57				88	0.932				88	0.824				88	0.785				88	0.739				88	0.439				88	0.54					88	1.48				88	0.546				88	0.688
		88.5	0.573				88.5	0.928				88.5	0.831				88.5	0.79				88.5	0.733				88.5	0.439				88.5	0.54					88.5	1.49				88.5	0.542				88.5	0.689
		89	0.573				89	0.921				89	0.835				89	0.788				89	0.734				89	0.439				89	0.539					89	1.51				89	0.544				89	0.693
		89.5	0.573				89.5	0.927				89.5	0.832				89.5	0.787				89.5	0.738				89.5	0.44				89.5	0.539					89.5	1.5				89.5	0.545				89.5	0.692
		90	0.571				90	0.916				90	0.832				90	0.788				90	0.734				90	0.439				90	0.539					90	1.48				90	0.547				90	0.686
		90.5	0.573				90.5	0.926				90.5	0.837				90.5	0.785				90.5	0.733				90.5	0.437				90.5	0.539					90.5	1.47				90.5	0.543				90.5	0.692
		91	0.573				91	0.928				91	0.828				91	0.79				91	0.735				91	0.438				91	0.542					91	1.44				91	0.545				91	0.69
		91.5	0.571				91.5	0.917				91.5	0.825				91.5	0.79				91.5	0.742				91.5	0.437				91.5	0.539					91.5	1.49				91.5	0.543				91.5	0.695
		92	0.573				92	0.927				92	0.838				92	0.787				92	0.739				92	0.437				92	0.538					92	1.48				92	0.544				92	0.692
		92.5	0.573				92.5	0.918				92.5	0.837				92.5	0.785				92.5	0.735				92.5	0.44				92.5	0.537					92.5	1.5				92.5	0.544				92.5	0.69
		93	0.574				93	0.947				93	0.83				93	0.785				93	0.738				93	0.438				93	0.54					93	1.47				93	0.544				93	0.696
		93.5	0.572				93.5	0.92				93.5	0.841				93.5	0.785				93.5	0.738				93.5	0.439				93.5	0.539					93.5	1.45				93.5	0.544				93.5	0.683
		94	0.573				94	0.91				94	0.837				94	0.785				94	0.741				94	0.438				94	0.54					94	1.48				94	0.546				94	0.681
		94.5	0.576				94.5	0.927				94.5	0.834				94.5	0.783				94.5	0.738				94.5	0.437				94.5	0.539					94.5	1.49				94.5	0.545				94.5	0.69
		95	0.577				95	0.923				95	0.835				95	0.789				95	0.738				95	0.437				95	0.538					95	1.46				95	0.545				95	0.691
		95.5	0.577				95.5	0.917				95.5	0.835				95.5	0.782				95.5	0.74				95.5	0.438				95.5	0.539					95.5	1.47				95.5	0.549				95.5	0.689
		96	0.575				96	0.927				96	0.838				96	0.782				96	0.733				96	0.439				96	0.54					96	1.5				96	0.546				96	0.691
		96.5	0.572				96.5	0.921				96.5	0.843				96.5	0.779				96.5	0.735				96.5	0.437				96.5	0.537					96.5	1.48				96.5	0.546				96.5	0.689
		97	0.573				97	0.922				97	0.839				97	0.781				97	0.734				97	0.438				97	0.539					97	1.46				97	0.544				97	0.69
		97.5	0.572				97.5	0.921				97.5	0.842				97.5	0.787				97.5	0.737				97.5	0.439				97.5	0.54					97.5	1.48				97.5	0.543				97.5	0.685
		98	0.574				98	0.93				98	0.842				98	0.786				98	0.743				98	0.436				98	0.539					98	1.47				98	0.546				98	0.686
		98.5	0.572				98.5	0.924				98.5	0.838				98.5	0.786				98.5	0.736				98.5	0.439				98.5	0.538					98.5	1.46				98.5	0.546				98.5	0.683
		99	0.574				99	0.942				99	0.842				99	0.782				99	0.734				99	0.437				99	0.538					99	1.45				99	0.545				99	0.687
		99.5	0.571				99.5	0.938				99.5	0.838				99.5	0.782				99.5	0.739				99.5	0.437				99.5	0.538					99.5	1.47				99.5	0.544				99.5	0.689
		100	0.57				100	0.929				100	0.833				100	0.782				100	0.732				100	0.437				100	0.538					100	1.47				100	0.546				100	0.686
		101	0.571				101	0.931				101	0.835				101	0.78				101	0.74				101	0.437				101	0.54					101	1.46				101	0.544				101	0.686
		101	0.572				101	0.927				101	0.838				101	0.784				101	0.737				101	0.439				101	0.535					101	1.5				101	0.543				101	0.684
		102	0.573				102	0.939				102	0.838				102	0.786				102	0.741				102	0.439				102	0.537					102	1.45				102	0.543				102	0.685
		102	0.571				102	0.93				102	0.84				102	0.78				102	0.739				102	0.438				102	0.538					102	1.5				102	0.546				102	0.691
		103	0.572				103	0.929				103	0.843				103	0.786				103	0.735				103	0.436				103	0.54					103	1.44				103	0.544				103	0.689
		103	0.569				103	0.933				103	0.832				103	0.789				103	0.74				103	0.436				103	0.536					103	1.47				103	0.546				103	0.692
		104	0.571				104	0.929				104	0.833				104	0.788				104	0.73				104	0.439				104	0.539					104	1.48				104	0.545				104	0.686
		104	0.574				104	0.932				104	0.84				104	0.78				104	0.739				104	0.436				104	0.537					104	1.46				104	0.545				104	0.689
		105	0.572				105	0.936				105	0.835				105	0.785				105	0.739				105	0.438				105	0.537					105	1.46				105	0.545				105	0.686
		105	0.572				105	0.948				105	0.836				105	0.783				105	0.738				105	0.44				105	0.539					105	1.45				105	0.542				105	0.689
		106	0.573				106	0.924				106	0.84				106	0.788				106	0.733				106	0.437				106	0.536					106	1.48				106	0.543				106	0.686
		106	0.574				106	0.93				106	0.832				106	0.782				106	0.744				106	0.437				106	0.537					106	1.45				106	0.543				106	0.686
		107	0.572				107	0.94				107	0.839				107	0.789				107	0.737				107	0.437				107	0.537					107	1.5				107	0.544				107	0.691
		107	0.572				107	0.929				107	0.835				107	0.789				107	0.74				107	0.437				107	0.536					107	1.49				107	0.542				107	0.689
		108	0.574				108	0.937				108	0.835				108	0.787				108	0.74				108	0.436				108	0.535					108	1.48				108	0.544				108	0.688
		108	0.571				108	0.942				108	0.83				108	0.789				108	0.739				108	0.436				108	0.539					108	1.49				108	0.542				108	0.688
		109	0.573				109	0.929				109	0.834				109	0.79				109	0.736				109	0.437				109	0.541					109	1.47				109	0.545				109	0.694
		109	0.571				109	0.939				109	0.826				109	0.793				109	0.737				109	0.439				109	0.541					109	1.48				109	0.543				109	0.691
		110	0.57				110	0.921				110	0.827				110	0.788				110	0.742				110	0.437				110	0.54					110	1.5				110	0.544				110	0.694
		110	0.573				110	0.926				110	0.83				110	0.788				110	0.738				110	0.44				110	0.541					110	1.49				110	0.543				110	0.689
		111	0.575				111	0.937				111	0.836				111	0.788				111	0.738				111	0.437				111	0.541					111	1.47				111	0.545				111	0.687
		111	0.574				111	0.933				111	0.835				111	0.79				111	0.736				111	0.438				111	0.542					111	1.49				111	0.543				111	0.682
		112	0.577				112	0.941				112	0.831				112	0.791				112	0.739				112	0.439				112	0.541					112	1.46				112	0.542				112	0.686
		112	0.572				112	0.929				112	0.835				112	0.793				112	0.738				112	0.439				112	0.542					112	1.47				112	0.542				112	0.688
		113	0.574				113	0.939				113	0.834				113	0.791				113	0.745				113	0.437				113	0.544					113	1.46				113	0.542				113	0.686
		113	0.573				113	0.933				113	0.837				113	0.796				113	0.737				113	0.439				113	0.545					113	1.48				113	0.542				113	0.68
		114	0.574				114	0.939				114	0.832				114	0.789				114	0.74				114	0.436				114	0.543					114	1.5				114	0.542				114	0.681
		114	0.574				114	0.922				114	0.826				114	0.798				114	0.741				114	0.438				114	0.544					114	1.45				114	0.543				114	0.691
		115	0.575				115	0.954				115	0.834				115	0.791				115	0.74				115	0.439				115	0.544					115	1.47				115	0.543				115	0.691
		115	0.577				115	0.94				115	0.834				115	0.798				115	0.737				115	0.436				115	0.543					115	1.49				115	0.544				115	0.685
		116	0.576				116	0.932				116	0.835				116	0.796				116	0.742				116	0.438				116	0.544					116	1.49				116	0.545				116	0.682
		116	0.573				116	0.927				116	0.84				116	0.794				116	0.743				116	0.438				116	0.542					116	1.48				116	0.542				116	0.691
		117	0.576				117	0.924				117	0.825				117	0.795				117	0.734				117	0.439				117	0.544					117	1.46				117	0.546				117	0.687
		117	0.574				117	0.935				117	0.838				117	0.793				117	0.738				117	0.439				117	0.541					117	1.49				117	0.549				117	0.686
		118	0.574				118	0.938				118	0.833				118	0.794				118	0.746				118	0.438				118	0.544					118	1.49				118	0.549				118	0.69
		118	0.573				118	0.938				118	0.828				118	0.789				118	0.736				118	0.437				118	0.541					118	1.46				118	0.549				118	0.683
		119	0.571				119	0.92				119	0.834				119	0.793				119	0.737				119	0.438				119	0.54					119	1.5				119	0.548				119	0.68
		119	0.573				119	0.921				119	0.84				119	0.787				119	0.737				119	0.436				119	0.54					119	1.48				119	0.547				119	0.684
		120	0.575				120	0.932				120	0.833				120	0.786				120	0.736				120	0.439				120	0.544					120	1.48				120	0.549				120	0.688
		120	0.572				120	0.933				120	0.837				120	0.788				120	0.746				120	0.438				120	0.541					120	1.48				120	0.551				120	0.688
		121	0.572				121	0.93				121	0.836				121	0.789				121	0.738				121	0.439				121	0.541					121	1.48				121	0.552				121	0.685
		121	0.572				121	0.922				121	0.83				121	0.789				121	0.742				121	0.439				121	0.542					121	1.48				121	0.553				121	0.685
		122	0.574				122	0.934				122	0.836				122	0.794				122	0.74				122	0.439				122	0.543					122	1.47				122	0.556				122	0.687
		122	0.577				122	0.913				122	0.833				122	0.792				122	0.743				122	0.436				122	0.544					122	1.5				122	0.554				122	0.698
		123	0.574				123	0.926				123	0.834				123	0.789				123	0.743				123	0.44				123	0.542					123	1.48				123	0.554				123	0.688
		123	0.576				123	0.922				123	0.833				123	0.792				123	0.738				123	0.439				123	0.543					123	1.47				123	0.555				123	0.688
		124	0.575				124	0.925				124	0.831				124	0.789				124	0.737				124	0.441				124	0.543					124	1.49				124	0.554				124	0.684
		124	0.573				124	0.928				124	0.84				124	0.785				124	0.741				124	0.438				124	0.545					124	1.5				124	0.557				124	0.69
		125	0.575				125	0.941				125	0.834				125	0.788				125	0.738				125	0.439				125	0.545					125	1.5				125	0.557				125	0.689
		125	0.573				125	0.929				125	0.84				125	0.785				125	0.741				125	0.437				125	0.541					125	1.46				125	0.557				125	0.69
		126	0.574				126	0.933				126	0.841				126	0.792				126	0.737				126	0.44				126	0.545					126	1.48				126	0.556				126	0.693
		126	0.574				126	0.937				126	0.84				126	0.791				126	0.74				126	0.436				126	0.546					126	1.48				126	0.557				126	0.696
		127	0.572				127	0.924				127	0.838				127	0.787				127	0.738				127	0.439				127	0.543					127	1.48				127	0.556				127	0.705
		127	0.574				127	0.932				127	0.832				127	0.787				127	0.741				127	0.439				127	0.541					127	1.5				127	0.558				127	0.702
		128	0.575				128	0.938				128	0.84				128	0.792				128	0.733				128	0.438				128	0.542					128	1.49				128	0.557				128	0.706
		128	0.578				128	0.937				128	0.84				128	0.795				128	0.741				128	0.437				128	0.543					128	1.47				128	0.557				128	0.714
		129	0.573				129	0.926				129	0.844				129	0.799				129	0.742				129	0.439				129	0.546					129	1.49				129	0.557				129	0.712
		129	0.572				129	0.915				129	0.84				129	0.792				129	0.735				129	0.437				129	0.543					129	1.5				129	0.56				129	0.718
		130	0.574				130	0.936				130	0.838				130	0.793				130	0.739				130	0.438				130	0.544					130	1.49				130	0.56				130	0.718
		130	0.572				130	0.935				130	0.837				130	0.799				130	0.744				130	0.439				130	0.544					130	1.5				130	0.56				130	0.719
		131	0.571				131	0.93				131	0.842				131	0.802				131	0.741				131	0.438				131	0.545					131	1.47				131	0.56				131	0.716
		131	0.573				131	0.928				131	0.841				131	0.796				131	0.737				131	0.44				131	0.543					131	1.47				131	0.56				131	0.726
		132	0.574				132	0.924				132	0.835				132	0.797				132	0.732				132	0.439				132	0.546					132	1.48				132	0.562				132	0.727
		132	0.573				132	0.934				132	0.844				132	0.793				132	0.741				132	0.438				132	0.547					132	1.46				132	0.559				132	0.732
		133	0.571				133	0.93				133	0.845				133	0.793				133	0.737				133	0.439				133	0.545					133	1.49				133	0.561				133	0.732
		133	0.576				133	0.932				133	0.839				133	0.795				133	0.735				133	0.436				133	0.545					133	1.49				133	0.562				133	0.73
		134	0.576				134	0.933				134	0.844				134	0.791				134	0.74				134	0.439				134	0.545					134	1.49				134	0.559				134	0.738
		134	0.571				134	0.928				134	0.844				134	0.794				134	0.744				134	0.438				134	0.546					134	1.47				134	0.56				134	0.735
		135	0.572				135	0.93				135	0.844				135	0.792				135	0.743				135	0.438				135	0.544					135	1.5				135	0.561				135	0.743
		135	0.574				135	0.935				135	0.843				135	0.787				135	0.74				135	0.438				135	0.546					135	1.47				135	0.563				135	0.737
		136	0.576				136	0.912				136	0.847				136	0.789				136	0.738				136	0.44				136	0.543					136	1.46				136	0.561				136	0.745
		136	0.572				136	0.925				136	0.843				136	0.786				136	0.743				136	0.437				136	0.542					136	1.49				136	0.561				136	0.744
		137	0.574				137	0.936				137	0.843				137	0.784				137	0.739				137	0.437				137	0.544					137	1.49				137	0.562				137	0.744
		137	0.571				137	0.914				137	0.841				137	0.791				137	0.738				137	0.438				137	0.543					137	1.46				137	0.563				137	0.752
		138	0.574				138	0.912				138	0.846				138	0.786				138	0.738				138	0.438				138	0.545					138	1.5				138	0.564				138	0.746
		138	0.575				138	0.923				138	0.84				138	0.79				138	0.737				138	0.438				138	0.543					138	1.48				138	0.562				138	0.744
		139	0.574				139	0.926				139	0.838				139	0.787				139	0.735				139	0.439				139	0.544					139	1.48				139	0.561				139	0.755
		139	0.575				139	0.939				139	0.836				139	0.792				139	0.742				139	0.438				139	0.541					139	1.47				139	0.563				139	0.752
		140	0.575				140	0.928				140	0.836				140	0.792				140	0.74				140	0.438				140	0.542					140	1.47				140	0.561				140	0.751
		140	0.571				140	0.925				140	0.837				140	0.793				140	0.739				140	0.438				140	0.542					140	1.48				140	0.561				140	0.748
		141	0.574				141	0.927				141	0.836				141	0.795				141	0.739				141	0.438				141	0.544					141	1.43				141	0.562				141	0.752
		141	0.574				141	0.927				141	0.834				141	0.789				141	0.736				141	0.437				141	0.546					141	1.49				141	0.562				141	0.751
		142	0.575				142	0.917				142	0.833				142	0.794				142	0.735				142	0.438				142	0.544					142	1.47				142	0.563				142	0.754
		142	0.574				142	0.924				142	0.838				142	0.793				142	0.739				142	0.437				142	0.542					142	1.48				142	0.564				142	0.754
		143	0.572				143	0.923				143	0.836				143	0.79				143	0.738				143	0.438				143	0.543					143	1.48				143	0.56				143	0.755
		143	0.575				143	0.923				143	0.835				143	0.799				143	0.737				143	0.437				143	0.545					143	1.5				143	0.561				143	0.755
		144	0.574				144	0.95				144	0.834				144	0.798				144	0.732				144	0.438				144	0.543					144	1.46				144	0.561				144	0.759
		144	0.575				144	0.942				144	0.828				144	0.797				144	0.738				144	0.439				144	0.544					144	1.46				144	0.56				144	0.756
		145	0.574				145	0.925				145	0.836				145	0.797				145	0.739				145	0.439				145	0.545					145	1.51				145	0.562				145	0.75
		145	0.573				145	0.932				145	0.83				145	0.797				145	0.747				145	0.437				145	0.54					145	1.45				145	0.563				145	0.757
		146	0.574				146	0.915				146	0.833				146	0.805				146	0.737				146	0.439				146	0.542					146	1.5				146	0.561				146	0.752
		146	0.58				146	0.935				146	0.833				146	0.8				146	0.737				146	0.437				146	0.546					146	1.46				146	0.562				146	0.749
		147	0.572				147	0.94				147	0.831				147	0.804				147	0.735				147	0.436				147	0.545					147	1.48				147	0.561				147	0.756
		147	0.574				147	0.924				147	0.827				147	0.804				147	0.744				147	0.439				147	0.544					147	1.52				147	0.561				147	0.759
		148	0.579				148	0.941				148	0.83				148	0.802				148	0.738				148	0.437				148	0.542					148	1.47				148	0.562				148	0.753
		148	0.574				148	0.927				148	0.833				148	0.799				148	0.74				148	0.44				148	0.544					148	1.49				148	0.562				148	0.758
		149	0.575				149	0.935				149	0.837				149	0.8				149	0.736				149	0.437				149	0.545					149	1.47				149	0.562				149	0.756
		149	0.576				149	0.917				149	0.827				149	0.799				149	0.74				149	0.44				149	0.545					149	1.47				149	0.561				149	0.764
		150	0.571				150	0.933				150	0.836				150	0.796				150	0.741				150	0.439				150	0.544					150	1.48				150	0.562				150	0.758
		150	0.576				150	0.931				150	0.833				150	0.799				150	0.74				150	0.442				150	0.544					150	1.45				150	0.561				150	0.77
		151	0.575				151	0.936				151	0.83				151	0.803				151	0.74				151	0.44				151	0.546					151	1.47				151	0.56				151	0.759
		151	0.575				151	0.913				151	0.827				151	0.798				151	0.734				151	0.44				151	0.546					151	1.49				151	0.563				151	0.762
		152	0.575				152	0.923				152	0.831				152	0.801				152	0.735				152	0.439				152	0.545					152	1.48				152	0.562				152	0.758
		152	0.575				152	0.932				152	0.831				152	0.799				152	0.747				152	0.441				152	0.544					152	1.47				152	0.562				152	0.762
		153	0.575				153	0.916				153	0.828				153	0.791				153	0.735				153	0.439				153	0.545					153	1.48				153	0.561				153	0.764
		153	0.575				153	0.935				153	0.83				153	0.796				153	0.741				153	0.439				153	0.544					153	1.45				153	0.561				153	0.762
		154	0.573				154	0.948				154	0.83				154	0.799				154	0.742				154	0.437				154	0.544					154	1.48				154	0.559				154	0.762
		154	0.575				154	0.913				154	0.831				154	0.799				154	0.738				154	0.44				154	0.543					154	1.46				154	0.563				154	0.764
		155	0.576				155	0.936				155	0.834				155	0.796				155	0.738				155	0.439				155	0.543					155	1.48				155	0.561				155	0.762
		155	0.575				155	0.929				155	0.828				155	0.797				155	0.739				155	0.44				155	0.544					155	1.47				155	0.562				155	0.758
		156	0.578				156	0.931				156	0.833				156	0.798				156	0.738				156	0.439				156	0.543					156	1.47				156	0.56				156	0.764
		156	0.575				156	0.927				156	0.826				156	0.8				156	0.74				156	0.44				156	0.542					156	1.45				156	0.561				156	0.761
		157	0.574				157	0.934				157	0.831				157	0.796				157	0.737				157	0.436				157	0.543					157	1.5				157	0.562				157	0.762
		157	0.574				157	0.941				157	0.837				157	0.795				157	0.74				157	0.436				157	0.542					157	1.47				157	0.561				157	0.767
		158	0.57				158	0.918				158	0.83				158	0.805				158	0.741				158	0.439				158	0.545					158	1.51				158	0.56				158	0.762
		158	0.572				158	0.932				158	0.829				158	0.799				158	0.735				158	0.438				158	0.545					158	1.49				158	0.563				158	0.762
		159	0.575				159	0.926				159	0.83				159	0.8				159	0.735				159	0.439				159	0.545					159	1.47				159	0.561				159	0.767
		159	0.578				159	0.94				159	0.834				159	0.804				159	0.738				159	0.439				159	0.544					159	1.49				159	0.562				159	0.765
		160	0.577				160	0.947				160	0.835				160	0.804				160	0.74				160	0.442				160	0.544					160	1.48				160	0.561				160	0.772
		160	0.574				160	0.923				160	0.826				160	0.807				160	0.74				160	0.44				160	0.545					160	1.52				160	0.56				160	0.761
		161	0.572				161	0.947				161	0.839				161	0.81				161	0.743				161	0.44				161	0.541					161	1.48				161	0.562				161	0.766
		161	0.573				161	0.932				161	0.832				161	0.808				161	0.74				161	0.438				161	0.546					161	1.45				161	0.561				161	0.765
		162	0.573				162	0.934				162	0.837				162	0.806				162	0.739				162	0.439				162	0.546					162	1.49				162	0.562				162	0.761
		162	0.576				162	0.948				162	0.833				162	0.807				162	0.742				162	0.441				162	0.545					162	1.48				162	0.562				162	0.764
		163	0.574				163	0.93				163	0.838				163	0.811				163	0.737				163	0.438				163	0.544					163	1.46				163	0.562				163	0.762
		163	0.578				163	0.946				163	0.835				163	0.812				163	0.736				163	0.44				163	0.546					163	1.49				163	0.563				163	0.761
		164	0.578				164	0.94				164	0.835				164	0.809				164	0.739				164	0.441				164	0.547					164	1.49				164	0.562				164	0.765
		164	0.577				164	0.951				164	0.831				164	0.807				164	0.741				164	0.437				164	0.545					164	1.49				164	0.562				164	0.758
		165	0.576				165	0.942				165	0.831				165	0.802				165	0.738				165	0.437				165	0.545					165	1.45				165	0.561				165	0.762
		165	0.577				165	0.934				165	0.829				165	0.809				165	0.736				165	0.44				165	0.546					165	1.5				165	0.563				165	0.772
		166	0.575				166	0.945				166	0.835				166	0.804				166	0.74				166	0.439				166	0.547					166	1.48				166	0.561				166	0.767
		166	0.578				166	0.943				166	0.836				166	0.801				166	0.741				166	0.437				166	0.544					166	1.48				166	0.562				166	0.766
		167	0.575				167	0.934				167	0.836				167	0.807				167	0.737				167	0.442				167	0.543					167	1.47				167	0.559				167	0.772
		167	0.573				167	0.956				167	0.83				167	0.803				167	0.738				167	0.442				167	0.544					167	1.48				167	0.564				167	0.769
		168	0.579				168	0.949				168	0.837				168	0.807				168	0.739				168	0.439				168	0.543					168	1.49				168	0.562				168	0.767
		168	0.575				168	0.943				168	0.839				168	0.802				168	0.741				168	0.44				168	0.544					168	1.48				168	0.561				168	0.765
		169	0.575				169	0.942				169	0.838				169	0.802				169	0.735				169	0.44				169	0.543					169	1.48				169	0.561				169	0.768
		169	0.575				169	0.951				169	0.835				169	0.799				169	0.737				169	0.438				169	0.541					169	1.45				169	0.563				169	0.768
		170	0.578				170	0.941				170	0.837				170	0.798				170	0.738				170	0.441				170	0.543					170	1.49				170	0.563				170	0.772
		170	0.577				170	0.928				170	0.838				170	0.798				170	0.742				170	0.441				170	0.541					170	1.48				170	0.561				170	0.77
		171	0.575				171	0.928				171	0.839				171	0.801				171	0.738				171	0.439				171	0.543					171	1.48				171	0.563				171	0.768
		171	0.58				171	0.941				171	0.839				171	0.798				171	0.738				171	0.439				171	0.54					171	1.5				171	0.561				171	0.775
		172	0.574				172	0.941				172	0.84				172	0.798				172	0.735				172	0.436				172	0.543					172	1.48				172	0.561				172	0.766
		172	0.577				172	0.943				172	0.84				172	0.796				172	0.738				172	0.439				172	0.544					172	1.48				172	0.562				172	0.765
		173	0.576				173	0.925				173	0.84				173	0.801				173	0.74				173	0.439				173	0.543					173	1.48				173	0.561				173	0.77
		173	0.576				173	0.934				173	0.837				173	0.795				173	0.742				173	0.439				173	0.544					173	1.51				173	0.561				173	0.772
		174	0.577				174	0.921				174	0.842				174	0.805				174	0.74				174	0.441				174	0.546					174	1.48				174	0.562				174	0.767
		174	0.576				174	0.932				174	0.839				174	0.796				174	0.743				174	0.44				174	0.542					174	1.49				174	0.561				174	0.77
		175	0.577				175	0.933				175	0.839				175	0.798				175	0.739				175	0.437				175	0.547					175	1.48				175	0.562				175	0.769
		175	0.576				175	0.932				175	0.843				175	0.801				175	0.744				175	0.439				175	0.543					175	1.5				175	0.561				175	0.762
		176	0.576				176	0.927				176	0.843				176	0.792				176	0.739				176	0.44				176	0.541					176	1.49				176	0.56				176	0.775
		176	0.576				176	0.94				176	0.839				176	0.803				176	0.735				176	0.438				176	0.544					176	1.49				176	0.562				176	0.773
		177	0.575				177	0.925				177	0.839				177	0.799				177	0.737				177	0.44				177	0.543					177	1.46				177	0.564				177	0.77
		177	0.575				177	0.95				177	0.841				177	0.793				177	0.74				177	0.437				177	0.545					177	1.49				177	0.56				177	0.767
		178	0.578				178	0.933				178	0.849				178	0.803				178	0.737				178	0.437				178	0.543					178	1.47				178	0.563				178	0.768
		178	0.575				178	0.939				178	0.846				178	0.798				178	0.736				178	0.439				178	0.547					178	1.46				178	0.562				178	0.772
		179	0.574				179	0.926				179	0.845				179	0.805				179	0.742				179	0.441				179	0.543					179	1.47				179	0.561				179	0.77
		179	0.577				179	0.928				179	0.839				179	0.796				179	0.739				179	0.438				179	0.543					179	1.51				179	0.561				179	0.762
		180	0.58				180	0.939				180	0.839				180	0.801				180	0.743				180	0.439				180	0.543					180	1.48				180	0.562				180	0.772
		180	0.577				180	0.942				180	0.836				180	0.802				180	0.736				180	0.44				180	0.541					180	1.49				180	0.561				180	0.774
		181	0.574				181	0.905				181	0.837				181	0.804				181	0.737				181	0.437				181	0.543					181	1.47				181	0.56				181	0.779
		181	0.579				181	0.937				181	0.842				181	0.802				181	0.735				181	0.436				181	0.542					181	1.48				181	0.559				181	0.763
		182	0.576				182	0.92				182	0.836				182	0.809				182	0.737				182	0.437				182	0.544					182	1.48				182	0.563				182	0.774
		182	0.576				182	0.92				182	0.842				182	0.813				182	0.744				182	0.441				182	0.544					182	1.49				182	0.561				182	0.774
		183	0.577				183	0.93				183	0.835				183	0.812				183	0.733				183	0.438				183	0.543					183	1.47				183	0.559				183	0.778
		183	0.579				183	0.934				183	0.837				183	0.81				183	0.738				183	0.44				183	0.544					183	1.48				183	0.56				183	0.773
		184	0.575				184	0.933				184	0.841				184	0.81				184	0.746				184	0.441				184	0.542					184	1.48				184	0.562				184	0.78
		184	0.578				184	0.94				184	0.829				184	0.806				184	0.741				184	0.439				184	0.542					184	1.46				184	0.559				184	0.769
		185	0.58				185	0.922				185	0.835				185	0.813				185	0.739				185	0.438				185	0.543					185	1.48				185	0.561				185	0.775
		185	0.58				185	0.938				185	0.834				185	0.807				185	0.739				185	0.44				185	0.542					185	1.49				185	0.562				185	0.775
		186	0.577				186	0.935				186	0.831				186	0.81				186	0.741				186	0.44				186	0.546					186	1.47				186	0.561				186	0.776
		186	0.579				186	0.942				186	0.832				186	0.809				186	0.735				186	0.44				186	0.543					186	1.49				186	0.558				186	0.777
		187	0.576				187	0.933				187	0.834				187	0.808				187	0.743				187	0.438				187	0.543					187	1.46				187	0.56				187	0.772
		187	0.575				187	0.927				187	0.83				187	0.816				187	0.74				187	0.44				187	0.546					187	1.49				187	0.561				187	0.777
		188	0.579				188	0.928				188	0.834				188	0.808				188	0.74				188	0.441				188	0.545					188	1.47				188	0.563				188	0.777
		188	0.576				188	0.935				188	0.836				188	0.807				188	0.739				188	0.441				188	0.547					188	1.48				188	0.56				188	0.77
		189	0.579				189	0.944				189	0.828				189	0.816				189	0.74				189	0.438				189	0.542					189	1.49				189	0.564				189	0.773
		189	0.574				189	0.936				189	0.835				189	0.807				189	0.739				189	0.442				189	0.548					189	1.49				189	0.56				189	0.782
		190	0.578				190	0.933				190	0.825				190	0.814				190	0.738				190	0.436				190	0.546					190	1.44				190	0.559				190	0.775
		190	0.574				190	0.93				190	0.834				190	0.811				190	0.74				190	0.437				190	0.542					190	1.48				190	0.561				190	0.767
		191	0.577				191	0.926				191	0.832				191	0.814				191	0.743				191	0.44				191	0.545					191	1.47				191	0.563				191	0.781
		191	0.577				191	0.944				191	0.835				191	0.814				191	0.738				191	0.436				191	0.542					191	1.51				191	0.561				191	0.776
		192	0.577				192	0.948				192	0.831				192	0.813				192	0.74				192	0.439				192	0.544					192	1.5				192	0.564				192	0.778
		192	0.577				192	0.945				192	0.827				192	0.809				192	0.741				192	0.435				192	0.544					192	1.48				192	0.562				192	0.771
		193	0.575				193	0.938				193	0.839				193	0.81				193	0.741				193	0.437				193	0.544					193	1.49				193	0.561				193	0.771
		193	0.574				193	0.944				193	0.834				193	0.81				193	0.74				193	0.439				193	0.543					193	1.49				193	0.563				193	0.781
		194	0.574				194	0.936				194	0.827				194	0.808				194	0.738				194	0.441				194	0.544					194	1.49				194	0.561				194	0.768
		194	0.575				194	0.933				194	0.833				194	0.809				194	0.74				194	0.439				194	0.545					194	1.45				194	0.563				194	0.77
		195	0.578				195	0.937				195	0.835				195	0.812				195	0.743				195	0.441				195	0.544					195	1.48				195	0.56				195	0.775
		195	0.574				195	0.938				195	0.841				195	0.814				195	0.738				195	0.437				195	0.542					195	1.49				195	0.563				195	0.777
		196	0.574				196	0.943				196	0.835				196	0.81				196	0.742				196	0.439				196	0.543					196	1.46				196	0.559				196	0.78
		196	0.574				196	0.933				196	0.84				196	0.808				196	0.744				196	0.439				196	0.546					196	1.48				196	0.562				196	0.772
		197	0.576				197	0.945				197	0.839				197	0.811				197	0.742				197	0.437				197	0.543					197	1.47				197	0.562				197	0.777
		197	0.578				197	0.94				197	0.838				197	0.81				197	0.743				197	0.439				197	0.544					197	1.51				197	0.561				197	0.77
		198	0.576				198	0.935				198	0.834				198	0.812				198	0.738				198	0.439				198	0.545					198	1.46				198	0.562				198	0.769
		198	0.572				198	0.96				198	0.84				198	0.807				198	0.743				198	0.438				198	0.545					198	1.49				198	0.562				198	0.776
		199	0.574				199	0.951				199	0.847				199	0.803				199	0.744				199	0.44				199	0.547					199	1.5				199	0.56				199	0.776
		199	0.575				199	0.94				199	0.836				199	0.802				199	0.743				199	0.438				199	0.544					199	1.48				199	0.56				199	0.779
		200	0.575				200	0.951				200	0.831				200	0.81				200	0.739				200	0.439				200	0.547					200	1.48				200	0.563				200	0.779
		200	0.575				200	0.947				200	0.837				200	0.804				200	0.741				200	0.439				200	0.546					200	1.48				200	0.561				200	0.767
		201	0.575				201	0.954				201	0.841				201	0.805				201	0.741				201	0.438				201	0.545					201	1.46				201	0.562				201	0.77
		201	0.571				201	0.937				201	0.846				201	0.808				201	0.736				201	0.436				201	0.543					201	1.47				201	0.561				201	0.771
		202	0.573				202	0.943				202	0.837				202	0.803				202	0.745				202	0.439				202	0.543					202	1.48				202	0.559				202	0.779
		202	0.576				202	0.943				202	0.841				202	0.797				202	0.738				202	0.438				202	0.545					202	1.49				202	0.559				202	0.776
		203	0.573				203	0.953				203	0.84				203	0.806				203	0.741				203	0.439				203	0.543					203	1.48				203	0.559				203	0.788
		203	0.574				203	0.943				203	0.842				203	0.809				203	0.743				203	0.439				203	0.546					203	1.46				203	0.56				203	0.774
		204	0.572				204	0.948				204	0.849				204	0.801				204	0.741				204	0.44				204	0.545					204	1.5				204	0.561				204	0.772
		204	0.573				204	0.942				204	0.845				204	0.808				204	0.741				204	0.438				204	0.547					204	1.48				204	0.56				204	0.78
		205	0.572				205	0.933				205	0.836				205	0.804				205	0.736				205	0.439				205	0.544					205	1.47				205	0.559				205	0.775
		205	0.573				205	0.949				205	0.837				205	0.806				205	0.747				205	0.44				205	0.545					205	1.5				205	0.561				205	0.774
		206	0.573				206	0.951				206	0.843				206	0.803				206	0.744				206	0.438				206	0.546					206	1.47				206	0.559				206	0.777
		206	0.577				206	0.946				206	0.843				206	0.798				206	0.742				206	0.439				206	0.545					206	1.49				206	0.559				206	0.777
		207	0.572				207	0.933				207	0.843				207	0.806				207	0.74				207	0.442				207	0.543					207	1.48				207	0.56				207	0.778
		207	0.57				207	0.93				207	0.845				207	0.806				207	0.747				207	0.439				207	0.544					207	1.49				207	0.559				207	0.779
		208	0.572				208	0.927				208	0.843				208	0.804				208	0.74				208	0.438				208	0.545					208	1.46				208	0.562				208	0.778
		208	0.575				208	0.927				208	0.849				208	0.802				208	0.739				208	0.439				208	0.544					208	1.49				208	0.56				208	0.78
		209	0.57				209	0.939				209	0.84				209	0.802				209	0.74				209	0.438				209	0.547					209	1.48				209	0.562				209	0.777
		209	0.574				209	0.936				209	0.84				209	0.801				209	0.743				209	0.44				209	0.544					209	1.5				209	0.559				209	0.771
		210	0.571				210	0.94				210	0.849				210	0.807				210	0.741				210	0.439				210	0.545					210	1.47				210	0.559				210	0.78
		210	0.571				210	0.938				210	0.84				210	0.807				210	0.736				210	0.44				210	0.547					210	1.5				210	0.562				210	0.776
		211	0.573				211	0.92				211	0.844				211	0.805				211	0.744				211	0.437				211	0.546					211	1.46				211	0.56				211	0.78
		211	0.574				211	0.931				211	0.844				211	0.804				211	0.737				211	0.439				211	0.544					211	1.45				211	0.557				211	0.782
		212	0.574				212	0.952				212	0.838				212	0.801				212	0.74				212	0.438				212	0.544					212	1.46				212	0.56				212	0.772
		212	0.57				212	0.939				212	0.84				212	0.807				212	0.741				212	0.437				212	0.545					212	1.49				212	0.559				212	0.776
		213	0.575				213	0.942				213	0.843				213	0.805				213	0.736				213	0.439				213	0.543					213	1.5				213	0.56				213	0.773
		213	0.571				213	0.958				213	0.842				213	0.8				213	0.746				213	0.438				213	0.543					213	1.46				213	0.558				213	0.781
		214	0.572				214	0.941				214	0.845				214	0.803				214	0.743				214	0.438				214	0.545					214	1.47				214	0.559				214	0.772
		214	0.573				214	0.945				214	0.843				214	0.803				214	0.744				214	0.438				214	0.545					214	1.51				214	0.559				214	0.774
		215	0.572				215	0.939				215	0.845				215	0.798				215	0.741				215	0.437				215	0.547					215	1.49				215	0.56				215	0.773
		215	0.574				215	0.932				215	0.845				215	0.805				215	0.744				215	0.439				215	0.543					215	1.48				215	0.559				215	0.78
		216	0.575				216	0.945				216	0.842				216	0.798				216	0.74				216	0.437				216	0.543					216	1.51				216	0.562				216	0.781
		216	0.572				216	0.942				216	0.836				216	0.811				216	0.74				216	0.437				216	0.546					216	1.49				216	0.562				216	0.776
		217	0.573				217	0.93				217	0.843				217	0.804				217	0.741				217	0.437				217	0.545					217	1.47				217	0.558				217	0.777
		217	0.573				217	0.943				217	0.836				217	0.798				217	0.743				217	0.438				217	0.546					217	1.49				217	0.559				217	0.775
		218	0.573				218	0.938				218	0.838				218	0.801				218	0.737				218	0.437				218	0.544					218	1.5				218	0.561				218	0.775
		218	0.573				218	0.941				218	0.844				218	0.801				218	0.738				218	0.437				218	0.546					218	1.53				218	0.56				218	0.77
		219	0.574				219	0.938				219	0.838				219	0.802				219	0.739				219	0.438				219	0.547					219	1.49				219	0.56				219	0.774
		219	0.573				219	0.942				219	0.843				219	0.795				219	0.736				219	0.437				219	0.544					219	1.49				219	0.562				219	0.782
		220	0.573				220	0.943				220	0.84				220	0.801				220	0.734				220	0.438				220	0.547					220	1.53				220	0.559				220	0.779
		220	0.574				220	0.931				220	0.839				220	0.807				220	0.739				220	0.439				220	0.547					220	1.48				220	0.561				220	0.775
		221	0.573				221	0.939				221	0.843				221	0.803				221	0.74				221	0.437				221	0.546					221	1.49				221	0.558				221	0.774
		221	0.575				221	0.94				221	0.838				221	0.804				221	0.739				221	0.436				221	0.547					221	1.49				221	0.559				221	0.785
		222	0.574				222	0.94				222	0.84				222	0.799				222	0.74				222	0.439				222	0.543					222	1.5				222	0.561				222	0.776
		222	0.574				222	0.943				222	0.842				222	0.801				222	0.74				222	0.437				222	0.547					222	1.47				222	0.56				222	0.773
		223	0.574				223	0.95				223	0.841				223	0.804				223	0.734				223	0.439				223	0.542					223	1.51				223	0.559				223	0.781
		223	0.577				223	0.938				223	0.838				223	0.806				223	0.746				223	0.439				223	0.544					223	1.48				223	0.56				223	0.777
		224	0.573				224	0.953				224	0.839				224	0.8				224	0.74				224	0.435				224	0.544					224	1.46				224	0.559				224	0.78
		224	0.574				224	0.93				224	0.842				224	0.803				224	0.74				224	0.439				224	0.543					224	1.51				224	0.559				224	0.779
		225	0.575				225	0.946				225	0.837				225	0.803				225	0.736				225	0.437				225	0.546					225	1.49				225	0.56				225	0.776
		225	0.571				225	0.945				225	0.837				225	0.798				225	0.736				225	0.437				225	0.545					225	1.49				225	0.558				225	0.78
		226	0.576				226	0.948				226	0.843				226	0.8				226	0.736				226	0.439				226	0.546					226	1.5				226	0.558				226	0.777
		226	0.571				226	0.942				226	0.837				226	0.803				226	0.735				226	0.44				226	0.543					226	1.48				226	0.561				226	0.777
		227	0.572				227	0.947				227	0.844				227	0.797				227	0.738				227	0.436				227	0.545					227	1.48				227	0.558				227	0.78
		227	0.574				227	0.947				227	0.837				227	0.8				227	0.736				227	0.439				227	0.546					227	1.49				227	0.558				227	0.779
		228	0.573				228	0.95				228	0.837				228	0.804				228	0.737				228	0.435				228	0.546					228	1.5				228	0.56				228	0.783
		228	0.576				228	0.951				228	0.843				228	0.798				228	0.737				228	0.439				228	0.546					228	1.51				228	0.559				228	0.781
		229	0.575				229	0.947				229	0.841				229	0.799				229	0.74				229	0.437				229	0.544					229	1.46				229	0.557				229	0.775
		229	0.577				229	0.951				229	0.833				229	0.803				229	0.744				229	0.437				229	0.542					229	1.5				229	0.558				229	0.776
		230	0.576				230	0.939				230	0.845				230	0.802				230	0.742				230	0.439				230	0.543					230	1.51				230	0.555				230	0.778
		230	0.574				230	0.955				230	0.841				230	0.799				230	0.743				230	0.439				230	0.543					230	1.49				230	0.559				230	0.779
		231	0.573				231	0.951				231	0.84				231	0.8				231	0.737				231	0.436				231	0.543					231	1.52				231	0.556				231	0.773
		231	0.575				231	0.949				231	0.842				231	0.805				231	0.736				231	0.438				231	0.541					231	1.5				231	0.558				231	0.782
		232	0.58				232	0.949				232	0.845				232	0.804				232	0.736				232	0.438				232	0.545					232	1.49				232	0.559				232	0.766
		232	0.573				232	0.962				232	0.838				232	0.805				232	0.739				232	0.438				232	0.546					232	1.48				232	0.559				232	0.765
		233	0.575				233	0.962				233	0.842				233	0.803				233	0.741				233	0.44				233	0.545					233	1.49				233	0.562				233	0.767
		233	0.574				233	0.957				233	0.841				233	0.801				233	0.74				233	0.437				233	0.544					233	1.51				233	0.558				233	0.769
		234	0.581				234	0.944				234	0.841				234	0.807				234	0.738				234	0.437				234	0.547					234	1.49				234	0.558				234	0.779
		234	0.573				234	0.935				234	0.843				234	0.805				234	0.739				234	0.438				234	0.543					234	1.48				234	0.56				234	0.78
		235	0.575				235	0.954				235	0.845				235	0.807				235	0.744				235	0.435				235	0.543					235	1.45				235	0.557				235	0.784
		235	0.577				235	0.951				235	0.846				235	0.807				235	0.738				235	0.437				235	0.546					235	1.49				235	0.558				235	0.774
		236	0.576				236	0.938				236	0.836				236	0.805				236	0.739				236	0.438				236	0.542					236	1.5				236	0.56				236	0.772
		236	0.576				236	0.955				236	0.837				236	0.807				236	0.737				236	0.439				236	0.545					236	1.49				236	0.561				236	0.786
		237	0.576				237	0.943				237	0.845				237	0.809				237	0.74				237	0.44				237	0.546					237	1.49				237	0.56				237	0.774
		237	0.573				237	0.951				237	0.842				237	0.812				237	0.737				237	0.436				237	0.545					237	1.49				237	0.559				237	0.773
		238	0.574				238	0.943				238	0.843				238	0.804				238	0.744				238	0.438				238	0.543					238	1.47				238	0.558				238	0.784
		238	0.576				238	0.953				238	0.841				238	0.812				238	0.744				238	0.44				238	0.545					238	1.5				238	0.557				238	0.772
		239	0.579				239	0.948				239	0.838				239	0.811				239	0.734				239	0.439				239	0.545					239	1.48				239	0.558				239	0.774
		239	0.576				239	0.959				239	0.832				239	0.81				239	0.737				239	0.437				239	0.545					239	1.49				239	0.557				239	0.779
		240	0.576				240	0.955				240	0.84				240	0.811				240	0.736				240	0.438				240	0.542					240	1.51				240	0.556				240	0.777
		240	0.574				240	0.956				240	0.84				240	0.812				240	0.744				240	0.437				240	0.543					240	1.49				240	0.557				240	0.773
		241	0.572				241	0.954				241	0.842				241	0.809				241	0.739				241	0.437				241	0.543					241	1.48				241	0.556				241	0.778
		241	0.576				241	0.948				241	0.836				241	0.813				241	0.74				241	0.439				241	0.54					241	1.5				241	0.558				241	0.783
		242	0.57				242	0.94				242	0.838				242	0.808				242	0.739				242	0.439				242	0.546					242	1.49				242	0.556				242	0.778
		242	0.574				242	0.93				242	0.835				242	0.809				242	0.735				242	0.439				242	0.544					242	1.49				242	0.558				242	0.777
		243	0.576				243	0.946				243	0.835				243	0.803				243	0.737				243	0.437				243	0.543					243	1.48				243	0.558				243	0.778
		243	0.578				243	0.948				243	0.838				243	0.808				243	0.734				243	0.441				243	0.542					243	1.5				243	0.558				243	0.777
		244	0.576				244	0.946				244	0.837				244	0.815				244	0.737				244	0.437				244	0.542					244	1.51				244	0.558				244	0.777
		244	0.576				244	0.943				244	0.843				244	0.81				244	0.737				244	0.436				244	0.544					244	1.51				244	0.557				244	0.774
		245	0.577				245	0.957				245	0.829				245	0.811				245	0.735				245	0.439				245	0.541					245	1.51				245	0.556				245	0.778
		245	0.573				245	0.957				245	0.837				245	0.81				245	0.739				245	0.439				245	0.545					245	1.51				245	0.558				245	0.777
		246	0.575				246	0.958				246	0.838				246	0.806				246	0.737				246	0.437				246	0.546					246	1.51				246	0.556				246	0.776
		246	0.571				246	0.949				246	0.834				246	0.805				246	0.737				246	0.438				246	0.543					246	1.5				246	0.56				246	0.78
		247	0.575				247	0.952				247	0.835				247	0.807				247	0.739				247	0.441				247	0.542					247	1.49				247	0.557				247	0.772
		247	0.575				247	0.967				247	0.841				247	0.805				247	0.738				247	0.436				247	0.546					247	1.5				247	0.557				247	0.78
		248	0.575				248	0.963				248	0.835				248	0.803				248	0.743				248	0.44				248	0.543					248	1.51				248	0.558				248	0.782
		248	0.574				248	0.96				248	0.837				248	0.804				248	0.744				248	0.44				248	0.543					248	1.51				248	0.559				248	0.775
		249	0.571				249	0.954				249	0.832				249	0.801				249	0.733				249	0.438				249	0.544					249	1.53				249	0.557				249	0.781
		249	0.572				249	0.949				249	0.835				249	0.799				249	0.737				249	0.439				249	0.543					249	1.51				249	0.558				249	0.777
		250	0.575				250	0.949				250	0.836				250	0.802				250	0.741				250	0.438				250	0.544					250	1.51				250	0.559				250	0.779
		250	0.573				250	0.953				250	0.831				250	0.804				250	0.738				250	0.438				250	0.541					250	1.52				250	0.557				250	0.773
		251	0.574				251	0.955				251	0.838				251	0.801				251	0.741				251	0.438				251	0.542					251	1.52				251	0.558				251	0.774
		251	0.572				251	0.941				251	0.837				251	0.798				251	0.739				251	0.436				251	0.544					251	1.51				251	0.556				251	0.777
		252	0.573				252	0.95				252	0.835				252	0.797				252	0.741				252	0.438				252	0.543					252	1.53				252	0.558				252	0.779
		252	0.57				252	0.952				252	0.834				252	0.795				252	0.742				252	0.437				252	0.544					252	1.53				252	0.556				252	0.774
		253	0.57				253	0.959				253	0.838				253	0.797				253	0.734				253	0.438				253	0.545					253	1.51				253	0.556				253	0.765
		253	0.568				253	0.956				253	0.844				253	0.802				253	0.736				253	0.437				253	0.544					253	1.5				253	0.558				253	0.773
		254	0.571				254	0.949				254	0.833				254	0.795				254	0.738				254	0.437				254	0.545					254	1.53				254	0.555				254	0.774
		254	0.574				254	0.962				254	0.836				254	0.793				254	0.737				254	0.438				254	0.545					254	1.5				254	0.56				254	0.776
		255	0.57				255	0.951				255	0.836				255	0.797				255	0.74				255	0.44				255	0.544					255	1.51				255	0.557				255	0.784
		255	0.571				255	0.962				255	0.831				255	0.797				255	0.733				255	0.442				255	0.543					255	1.51				255	0.556				255	0.764
		256	0.572				256	0.955				256	0.841				256	0.796				256	0.739				256	0.44				256	0.544					256	1.52				256	0.557				256	0.773
		256	0.57				256	0.96				256	0.837				256	0.792				256	0.733				256	0.441				256	0.543					256	1.46				256	0.556				256	0.778
		257	0.571				257	0.966				257	0.844				257	0.789				257	0.735				257	0.442				257	0.542					257	1.48				257	0.558				257	0.782
		257	0.572				257	0.949				257	0.834				257	0.793				257	0.733				257	0.44				257	0.543					257	1.51				257	0.554				257	0.781
		258	0.575				258	0.94				258	0.836				258	0.79				258	0.734				258	0.441				258	0.544					258	1.48				258	0.555				258	0.784
		258	0.574				258	0.951				258	0.833				258	0.792				258	0.739				258	0.439				258	0.545					258	1.51				258	0.556				258	0.783
		259	0.57				259	0.965				259	0.831				259	0.796				259	0.743				259	0.438				259	0.548					259	1.49				259	0.555				259	0.771
		259	0.574				259	0.958				259	0.836				259	0.795				259	0.74				259	0.437				259	0.544					259	1.47				259	0.559				259	0.77
		260	0.569				260	0.954				260	0.838				260	0.787				260	0.743				260	0.439				260	0.543					260	1.5				260	0.559				260	0.774
		260	0.57				260	0.955				260	0.836				260	0.788				260	0.743				260	0.437				260	0.545					260	1.5				260	0.555				260	0.776
		261	0.573				261	0.951				261	0.837				261	0.79				261	0.751				261	0.436				261	0.547					261	1.45				261	0.556				261	0.781
		261	0.573				261	0.959				261	0.84				261	0.79				261	0.744				261	0.436				261	0.546					261	1.49				261	0.553				261	0.778
		262	0.573				262	0.953				262	0.841				262	0.788				262	0.739				262	0.435				262	0.544					262	1.51				262	0.556				262	0.783
		262	0.571				262	0.941				262	0.836				262	0.787				262	0.741				262	0.434				262	0.544					262	1.51				262	0.555				262	0.779
		263	0.576				263	0.958				263	0.832				263	0.787				263	0.744				263	0.437				263	0.541					263	1.47				263	0.554				263	0.778
		263	0.571				263	0.945				263	0.836				263	0.789				263	0.741				263	0.437				263	0.547					263	1.49				263	0.558				263	0.772
		264	0.57				264	0.951				264	0.836				264	0.789				264	0.74				264	0.434				264	0.543					264	1.51				264	0.556				264	0.773
		264	0.567				264	0.954				264	0.832				264	0.778				264	0.737				264	0.434				264	0.546					264	1.5				264	0.556				264	0.77
		265	0.571				265	0.952				265	0.839				265	0.79				265	0.736				265	0.436				265	0.545					265	1.48				265	0.556				265	0.775
		265	0.569				265	0.944				265	0.836				265	0.787				265	0.74				265	0.437				265	0.545					265	1.51				265	0.556				265	0.774
		266	0.572				266	0.952				266	0.838				266	0.785				266	0.736				266	0.435				266	0.544					266	1.5				266	0.554				266	0.778
		266	0.571				266	0.941				266	0.836				266	0.785				266	0.731				266	0.435				266	0.544					266	1.49				266	0.557				266	0.78
		267	0.572				267	0.956				267	0.833				267	0.776				267	0.736				267	0.436				267	0.544					267	1.46				267	0.56				267	0.779
		267	0.569				267	0.961				267	0.833				267	0.786				267	0.734				267	0.436				267	0.541					267	1.47				267	0.555				267	0.77
		268	0.571				268	0.94				268	0.828				268	0.786				268	0.734				268	0.434				268	0.541					268	1.5				268	0.558				268	0.775
		268	0.568				268	0.951				268	0.828				268	0.782				268	0.731				268	0.434				268	0.545					268	1.48				268	0.557				268	0.772
		269	0.57				269	0.954				269	0.83				269	0.787				269	0.733				269	0.435				269	0.544					269	1.49				269	0.555				269	0.776
		269	0.573				269	0.945				269	0.831				269	0.784				269	0.742				269	0.435				269	0.545					269	1.49				269	0.557				269	0.775
		270	0.568				270	0.947				270	0.832				270	0.783				270	0.731				270	0.436				270	0.544					270	1.52				270	0.556				270	0.78
		270	0.57				270	0.869				270	0.84				270	0.791				270	0.733				270	0.434				270	0.543					270	1.5				270	0.556				270	0.777
		271	0.568				271	0.883				271	0.835				271	0.779				271	0.736				271	0.435				271	0.542					271	1.49				271	0.556				271	0.779
		271	0.569				271	0.886				271	0.839				271	0.784				271	0.738				271	0.434				271	0.545					271	1.5				271	0.554				271	0.776
		272	0.568				272	0.896				272	0.837				272	0.782				272	0.738				272	0.435				272	0.544					272	1.48				272	0.555				272	0.786
		272	0.571				272	0.874				272	0.842				272	0.783				272	0.734				272	0.434				272	0.545					272	1.46				272	0.558				272	0.777
		273	0.572				273	0.883				273	0.838				273	0.778				273	0.732				273	0.436				273	0.545					273	1.49				273	0.556				273	0.777
		273	0.571				273	0.891				273	0.838				273	0.783				273	0.729				273	0.437				273	0.543					273	1.47				273	0.556				273	0.784
		274	0.569				274	0.876				274	0.84				274	0.78				274	0.732				274	0.436				274	0.546					274	1.47				274	0.555				274	0.782
		274	0.571				274	0.885				274	0.835				274	0.78				274	0.73				274	0.436				274	0.544					274	1.47				274	0.557				274	0.776
		275	0.565				275	0.896				275	0.84				275	0.783				275	0.729				275	0.436				275	0.543					275	1.46				275	0.554				275	0.778
		275	0.564				275	0.888				275	0.841				275	0.782				275	0.733				275	0.436				275	0.545					275	1.46				275	0.557				275	0.777
		276	0.571				276	0.884				276	0.842				276	0.778				276	0.734				276	0.436				276	0.546					276	1.49				276	0.557				276	0.773
		276	0.57				276	0.886				276	0.848				276	0.782				276	0.736				276	0.436				276	0.545					276	1.44				276	0.557				276	0.782
		277	0.57				277	0.888				277	0.842				277	0.788				277	0.735				277	0.435				277	0.543					277	1.46				277	0.553				277	0.774
		277	0.568				277	0.888				277	0.846				277	0.785				277	0.731				277	0.435				277	0.547					277	1.47				277	0.554				277	0.781
		278	0.57				278	0.887				278	0.842				278	0.783				278	0.732				278	0.437				278	0.544					278	1.48				278	0.558				278	0.777
		278	0.567				278	0.895				278	0.843				278	0.784				278	0.737				278	0.437				278	0.546					278	1.49				278	0.553				278	0.779
		279	0.57				279	0.884				279	0.849				279	0.782				279	0.733				279	0.434				279	0.546					279	1.49				279	0.556				279	0.779
		279	0.569				279	0.9				279	0.844				279	0.78				279	0.733				279	0.435				279	0.544					279	1.46				279	0.557				279	0.785
		280	0.571				280	0.88				280	0.839				280	0.782				280	0.731				280	0.437				280	0.546					280	1.48				280	0.556				280	0.775
		280	0.57				280	0.89				280	0.848				280	0.785				280	0.727				280	0.433				280	0.544					280	1.47				280	0.555				280	0.78
		281	0.57				281	0.88				281	0.852				281	0.784				281	0.725				281	0.435				281	0.543					281	1.46				281	0.555				281	0.777
		281	0.568				281	0.881				281	0.853				281	0.779				281	0.731				281	0.436				281	0.543					281	1.46				281	0.558				281	0.782
		282	0.569				282	0.88				282	0.854				282	0.781				282	0.726				282	0.436				282	0.547					282	1.48				282	0.556				282	0.779
		282	0.569				282	0.882				282	0.853				282	0.785				282	0.738				282	0.436				282	0.545					282	1.47				282	0.557				282	0.774
		283	0.57				283	0.886				283	0.848				283	0.777				283	0.731				283	0.435				283	0.545					283	1.51				283	0.556				283	0.777
		283	0.571				283	0.893				283	0.852				283	0.781				283	0.728				283	0.438				283	0.545					283	1.48				283	0.557				283	0.774
		284	0.572				284	0.884				284	0.856				284	0.782				284	0.733				284	0.435				284	0.546					284	1.49				284	0.556				284	0.781
		284	0.568				284	0.882				284	0.86				284	0.787				284	0.735				284	0.437				284	0.546					284	1.48				284	0.557				284	0.779
		285	0.571				285	0.887				285	0.859				285	0.782				285	0.735				285	0.435				285	0.546					285	1.47				285	0.557				285	0.781
		285	0.57				285	0.87				285	0.86				285	0.781				285	0.732				285	0.436				285	0.541					285	1.47				285	0.557				285	0.782
		286	0.569				286	0.871				286	0.857				286	0.784				286	0.733				286	0.437				286	0.544					286	1.5				286	0.554				286	0.772
		286	0.571				286	0.875				286	0.857				286	0.781				286	0.73				286	0.437				286	0.546					286	1.47				286	0.555				286	0.774
		287	0.572				287	0.879				287	0.862				287	0.778				287	0.736				287	0.434				287	0.546					287	1.49				287	0.557				287	0.778
		287	0.571				287	0.874				287	0.856				287	0.785				287	0.733				287	0.438				287	0.544					287	1.48				287	0.555				287	0.776
		288	0.571				288	0.874				288	0.855				288	0.781				288	0.734				288	0.436				288	0.547					288	1.5				288	0.553				288	0.787
		288	0.57				288	0.882				288	0.858				288	0.782				288	0.736				288	0.435				288	0.545					288	1.47				288	0.556				288	0.78
		289	0.572				289	0.885				289	0.849				289	0.783				289	0.731				289	0.435				289	0.547					289	1.46				289	0.557				289	0.771
		289	0.57				289	0.868				289	0.854				289	0.775				289	0.731				289	0.435				289	0.544					289	1.47				289	0.556				289	0.771
		290	0.571				290	0.868				290	0.858				290	0.776				290	0.733				290	0.436				290	0.538					290	1.52				290	0.555				290	0.771
		290	0.57				290	0.876				290	0.851				290	0.778				290	0.73				290	0.436				290	0.542					290	1.45				290	0.554				290	0.771
		291	0.574				291	0.881				291	0.854				291	0.777				291	0.728				291	0.436				291	0.541					291	1.47				291	0.558				291	0.774
		291	0.572				291	0.869				291	0.856				291	0.779				291	0.735				291	0.435				291	0.542					291	1.47				291	0.557				291	0.774
		292	0.574				292	0.877				292	0.856				292	0.778				292	0.733				292	0.433				292	0.544					292	1.46				292	0.553				292	0.772
		292	0.57				292	0.891				292	0.851				292	0.779				292	0.732				292	0.434				292	0.545					292	1.52				292	0.555				292	0.777
		293	0.573				293	0.878				293	0.855				293	0.783				293	0.73				293	0.436				293	0.548					293	1.48				293	0.556				293	0.769
		293	0.57				293	0.873				293	0.852				293	0.776				293	0.734				293	0.435				293	0.547					293	1.49				293	0.556				293	0.776
		294	0.57				294	0.884				294	0.847				294	0.783				294	0.727				294	0.436				294	0.549					294	1.47				294	0.557				294	0.78
		294	0.573				294	0.883				294	0.848				294	0.773				294	0.736				294	0.435				294	0.547					294	1.47				294	0.554				294	0.787
		295	0.574				295	0.883				295	0.852				295	0.778				295	0.734				295	0.436				295	0.545					295	1.48				295	0.555				295	0.778
		295	0.572				295	0.885				295	0.851				295	0.782				295	0.73				295	0.438				295	0.549					295	1.47				295	0.555				295	0.779
		296	0.574				296	0.877				296	0.851				296	0.783				296	0.729				296	0.432				296	0.547					296	1.47				296	0.555				296	0.783
		296	0.573				296	0.887				296	0.844				296	0.782				296	0.737				296	0.436				296	0.547					296	1.47				296	0.554				296	0.778
		297	0.574				297	0.888				297	0.855				297	0.777				297	0.733				297	0.434				297	0.545					297	1.45				297	0.553				297	0.779
		297	0.574				297	0.881				297	0.852				297	0.781				297	0.731				297	0.436				297	0.547					297	1.47				297	0.554				297	0.777
		298	0.574				298	0.861				298	0.856				298	0.778				298	0.732				298	0.435				298	0.544					298	1.47				298	0.555				298	0.779
		298	0.571				298	0.892				298	0.852				298	0.783				298	0.733				298	0.435				298	0.545					298	1.46				298	0.552				298	0.775
		299	0.572				299	0.871				299	0.851				299	0.779				299	0.737				299	0.436				299	0.545					299	1.49				299	0.553				299	0.782
		299	0.576				299	0.877				299	0.855				299	0.783				299	0.732				299	0.435				299	0.541					299	1.47				299	0.556				299	0.777
		300	0.571				300	0.883				300	0.853				300	0.769				300	0.732				300	0.436				300	0.543					300	1.49				300	0.555				300	0.778
