# Supplementary material for: Molecular basis of the PIP2-dependent regulation of CaV2.2 channel and its modulation by CaV β subunits
Source: eLife. 2022 Nov 14;11:e69500. doi: 10.7554/eLife.69500 (PMC9662827; doi:10.7554/eLife.69500)
Supplement: Figure 3—source data 2. [file elife-69500-fig3-data2.xlsx]

## Sheet: Sheet1
Figure 3 - Source Data 2
Current inactivation (r100) and current inhibition (%) by PIP2 depletion in CaV2.2 channels with rapamycin-induced translocatable β2 chimeric constructs before and after rapamycin.
Figure3 C and D: Current inactivation (r100) in CaV2.2 channels with rapamycin-induced translocatable β2 chimeric constructs before and after rapamycin
Statistical analysis from GraphPad Prism 7.0 (two-way ANOVA followed by Sidak's multiple comparisons test)
Current inactivation (r100)	before_1	before_2	before_3	before_4	before_5	before_6	before_7	before_8	before_9	before average	before SE	after_1	after_2	after_3	after_4	after_5	after_6	after_7	after_8	after_9	after average	after SE
Control	0.222224	0.139139	0.171172	0.108211	0.145963	0.140273	0.0940436			0.145861	0.0159246	0.262752	0.152664	0.199307	0.141753	0.138811	0.120286	0.0610985			0.15381	0.0239192
RF	0.300298	0.192015	0.244406	0.155246	0.263393	0.20384	0.179001			0.219743	0.0194227	0.605029	0.543152	0.650052	0.650616	0.654787	0.628992	0.685209			0.63112	0.0173534
RCF	0.129147	0.165197	0.154175	0.139111	0.125102	0.174329	0.133566	0.0804146	0.108507	0.134394	0.00961449	0.304429	0.257406	0.265555	0.203424	0.32529	0.167881	0.177804	0.241494	0.128417	0.230189	0.0218504
Figure3 E and F: Current inhibition (%) by PIP2 depletion in CaV2.2 channels with rapamycin-induced translocatable β2 chimeric constructs before and after rapamycin
Statistical analysis from GraphPad Prism 7.0 (two-way ANOVA followed by Sidak's multiple comparisons test)
Current inhibition (%)	before_1	before_2	before_3	before_4	before_5	before_6	before_7	before_8	before_9	before average	before SE	after_1	after_2	after_3	after_4	after_5	after_6	after_7	after_8	after_9	after average	after SE
Control	43.4724	44.3334	48.1472	50.3845	49.668	36.6978	35.5046			44.0297	2.2676	38.1211	39.1743	46.0423	47.3914	48.6018	34.5115	33.7925			41.0907	2.33846
RF	46.8531	34.1751	39.8315	40.855	45.0536	44.0804	35.6497			40.9283	1.80432	22.2255	18.6055	14.7713	22.2187	16.6582	22.7396	15.7438			18.9947	1.28056
RCF	43.2104	45.2565	36.7506	40.8266	48.5446	39.3648	46.2289	42.911	41.0016	42.6772	1.21542	23.1008	34.5941	23.0374	27.7322	27.1891	42.2849	32.3368	42.8478	27.626	31.1943	2.48459
