# Supplementary material for: Molecular basis of the PIP2-dependent regulation of CaV2.2 channel and its modulation by CaV β subunits
Source: eLife. 2022 Nov 14;11:e69500. doi: 10.7554/eLife.69500 (PMC9662827; doi:10.7554/eLife.69500)
Supplement: Figure 4—figure supplement 2—source data 1. [file elife-69500-fig4-figsupp2-data1.xlsx]

## Sheet: Sheet1
Figure 4 - figure supplement 2 - Source Data 1
Time constants of current activation in CaV2.2 channels with diverse CaV β-GK derivatives.
Figure4 - figure supplement 2: Time constants of current activation in CaV2.2 channels with diverse CaV β-GK derivatives
τ activation (ms)	n_1	n_2	n_3	n_4	n_5	n_6	n_7	n_8	n_9	n_10	Average	SE
Lyn-GK	4.143	3.1529	4.759	3.523	3.3456	3.2802	4.5785	5.1723	3.4689	4.5206	3.9944	0.229727
Lyn-6aa-GK	2.0292	3.1218	1.4752	2.5441	1.805	1.6661	1.8927	2.4149	2.0664	1.8204	2.08358	0.153866
Lyn-11aa-GK	1.3143	1.6271	1.3923	1.4385	1.341	1.4701	1.754	1.1474	1.4933		1.442	0.0590206
Lyn-15aa-GK	1.0791	0.68291	0.94906	1.1251	1.1772	1.2069	1.0677	1.3391	1.5425		1.12995	0.08003
Lyn-22aa-GK	0.87381	1.3311	1.2715	1.1682	0.95501	0.87174	1.0337	1.075	1.4354		1.11283	0.0674732
Lyn-43aa-GK	0.98183	0.9634	1.1515	1.0405	1.0081	0.85972	0.81302	0.68608	1.5453		1.00549	0.0813595
GK	0.77818	0.80604	0.74365	0.81671	0.74162	1.2165	1.5622	1.3664	1.2177		1.02767	0.104787
