# Supplementary material for: Molecular basis of the PIP2-dependent regulation of CaV2.2 channel and its modulation by CaV β subunits
Source: eLife. 2022 Nov 14;11:e69500. doi: 10.7554/eLife.69500 (PMC9662827; doi:10.7554/eLife.69500)
Supplement: Figure 4—figure supplement 3—source data 1. — Peak current density at 10 mV (pA/pF) of CaV2.2 channels with β2 variants. [file elife-69500-fig4-figsupp3-data1.xlsx]

## Sheet: Sheet1
Figure 4 - figure supplement 3 - Source Data 1
Population current density versus voltage relations for CaV2.2 channels with β2 variants. Peak current density at 10 mV (pA/pF) of CaV2.2 channels with β2 variants.
Figure4 - figure supplement 3B: Population current density versus voltage relations for CaV2.2 channels with β2a and β2c
β2a
Voltage (mV)	n_1	n_2	n_3	n_4	n_5	n_6	n_7	n_8	Average	SE
-50	-7.32788	-1.08915	-1.08491	-2.32472	-0.993014	-2.1737	-1.39747	-6.63426	-2.87814	0.914891
-40	-5.79635	-0.899407	-0.81035	-2.05425	-0.650822	-1.61604	-0.924375	-5.20688	-2.24481	0.731572
-30	-5.22272	-1.94669	-0.669333	-1.95196	-0.597057	-1.05312	-0.662563	-4.68149	-2.09812	0.65368
-20	-12.6494	-10.7259	-3.19014	-6.09263	-3.69958	-1.56033	-2.52968	-4.50753	-5.6194	1.41779
-10	-80.0582	-118.888	-34.7339	-85.9757	-33.2825	-8.98426	-24.3604	-13.8843	-50.0209	14.0787
0	-196.179	-219.503	-185.768	-145.576	-144.224	-42.2642	-117.694	-57.567	-138.597	22.5396
10	-216.411	-284.116	-199.392	-193.363	-175.184	-76.9437	-128.534	-88.1842	-170.266	24.526
20	-118.871	-134.32	-123.099	-90.8248	-93.529	-66.0975	-83.2334	-63.7981	-96.7216	9.30505
30	-44.4044	-56.3581	-61.7592	-40.1044	-45.3865	-37.4072	-38.5975	-27.8	-43.9772	3.82768
40	11.3386	3.28296	-12.8245	1.29185	-5.99276	-14.1764	-4.55584	-0.773247	-2.80116	2.99089
β2c
Voltage (mV)	n_1	n_2	n_3	n_4	n_5	n_6	n_7	n_8	n_9	Average	SE
-50	0.94024	1.56894	0.449533	1.73987	-4.38175	-1.55569	-1.21958	-0.61505	-1.04892	-0.458045	0.637622
-40	0.844807	1.57823	0.463187	1.52434	-3.44703	-1.23603	-0.88268	-0.463882	-0.842274	-0.273482	0.529453
-30	0.729724	1.30049	0.207177	1.00588	-2.93704	-1.07523	-0.709172	-0.293196	-0.470318	-0.249076	0.429996
-20	0.203074	-0.260907	-1.74769	-0.930658	-3.97549	-3.78726	-2.21198	-0.343968	-0.671174	-1.52512	0.509705
-10	-3.80365	-9.32656	-18.3231	-14.8587	-20.0889	-29.7925	-17.8027	-2.41855	-5.18776	-13.5114	3.01802
0	-15.3706	-37.9336	-99.6786	-69.3145	-83.3095	-105.661	-90.1573	-13.1054	-21.9049	-59.604	12.5425
10	-22.0871	-57.9197	-156.737	-125.581	-120.125	-101.723	-136.638	-25.5587	-36.424	-86.9771	17.2892
20	-18.3362	-48.0247	-122.275	-103.777	-82.9408	-63.7269	-99.326	-22.1704	-29.9916	-65.6187	12.8062
30	-10.5881	-28.0101	-73.4684	-62.7536	-39.5253	-30.0956	-52.7528	-13.354	-15.9514	-36.2777	7.51968
40	-4.4469	-10.1806	-33.3246	-29.2471	-5.33604	-6.34235	-18.2754	-5.87884	-5.50929	-13.1712	3.7186
Figure4 - figure supplement 3C: Peak current density at 10 mV (pA/pF) of CaV2.2 channels with β2a and β2c
Statistical analysis from GraphPad Prism 7.0 (Student’s t-test)
Current density	n_1	n_2	n_3	n_4	n_5	n_6	n_7	n_8	n_9	Average	SE
β2a	-216.411	-284.116	-199.392	-193.363	-175.184	-76.9437	-128.534	-88.1842		-170.266	24.526
β2c	-22.0871	-57.9197	-156.737	-125.581	-120.125	-101.723	-136.638	-25.5587	-36.424	-86.9771	17.2892
Figure4 - figure supplement 3E: Population current density versus voltage relations for CaV2.2 channels with Lyn-β2c and Lyn-48aa-β2c
Lyn-β2c
Voltage	n_1	n_2	n_3	n_4	n_5	n_6	n_7	Average	SE
-50	-1.00936	-0.873655	-1.86787	-0.982806	-3.66932	-0.642212	-0.738485	-1.39767	0.407787
-40	-0.797039	-0.762809	-1.23314	-0.849147	-2.80499	-0.41223	-0.718814	-1.0826	0.301162
-30	-0.661099	-0.659522	-1.34167	-0.98793	-2.41795	-0.474	-0.734256	-1.03949	0.253293
-20	-5.11284	-3.53441	-6.17356	-3.93522	-4.31631	-1.09654	-3.99668	-4.02365	0.591809
-10	-49.2504	-27.6923	-92.2276	-39.0775	-28.1591	-9.81783	-60.4782	-43.8147	10.1586
0	-183.679	-107.913	-122.14	-94.8096	-149.824	-77.7386	-146.98	-126.155	13.7827
10	-225.042	-108.912	-169.923	-122.32	-169.356	-122.459	-197.851	-159.409	16.3923
20	-120.26	-69.3124	-73.3222	-57.4178	-110.911	-86.8887	-93.3995	-87.3588	8.58162
30	-63.0489	-31.6792	-30.5273	-24.5369	-51.7635	-46.8005	-44.2663	-41.8032	5.13947
40	-19.4906	-4.925	1.7103	-0.0637006	-7.41203	-15.9041	-4.14004	-7.17502	2.97497
Lyn-48aa-β2c
Voltage	n_1	n_2	n_3	n_4	n_5	n_6	n_7	Average	SE
-50	-0.821669	-1.14197	-1.39931	-0.647828	-0.494179	-6.57807	-1.25211	-1.76216	0.812162
-40	-0.334522	-0.943014	-0.93297	-0.463247	-0.108771	-5.25654	-0.812497	-1.26451	0.676062
-30	-0.3847	-0.923152	-0.890327	-0.221463	0.114496	-4.15742	-0.552672	-1.00218	0.543667
-20	-1.12588	-0.880324	-2.49941	-0.437292	0.152168	-5.92088	-2.28407	-1.85653	0.766112
-10	-17.0356	-3.71792	-20.2738	-3.50056	-2.51466	-33.2005	-15.3005	-13.6491	4.27043
0	-97.9936	-20.6205	-97.1382	-20.8308	-13.8387	-130.138	-70.2538	-64.402	17.5442
10	-169.4	-37.1111	-98.9725	-36.0805	-25.0149	-107.831	-95.9927	-81.486	19.6146
20	-126.297	-26.1679	-65.6156	-26.8845	-18.8745	-64.7981	-68.5378	-56.7394	14.126
30	-69.2924	-13.1473	-33.6911	-13.8609	-10.0404	-23.4144	-36.3895	-28.548	7.82217
40	-26.5095	-3.85614	-9.60028	-4.88398	-2.672	7.72618	-12.104	-7.41424	3.97068
Figure4 - figure supplement 3F: Peak current density at 10 mV (pA/pF) of CaV2.2 channels with Lyn-β2c and Lyn-48aa-β2c
Statistical analysis from GraphPad Prism 7.0 (Student’s t-test)
Current density	n_1	n_2	n_3	n_4	n_5	n_6	n_7	Average	SE
Lyn-β2c	-225.042	-108.912	-169.923	-122.32	-169.356	-122.459	-197.851	-159.409	16.3923
Lyn-48aa-β2c	-169.4	-37.1111	-98.9725	-36.0805	-25.0149	-107.831	-95.9927	-81.486	19.6146
