# Supplementary material for: Molecular basis of the PIP2-dependent regulation of CaV2.2 channel and its modulation by CaV β subunits
Source: eLife. 2022 Nov 14;11:e69500. doi: 10.7554/eLife.69500 (PMC9662827; doi:10.7554/eLife.69500)
Supplement: Figure 4—figure supplement 4—source data 1. [file elife-69500-fig4-figsupp4-data1.xlsx]

## Sheet: Sheet1
Figure 4 - figure supplement 4 - Source Data 1
Population current density versus voltage relations and the voltage dependence of normalized steady-state activation for CaV2.2 channels with the engineered β2 GK derivatives.
Figure4 - figure supplement 4A: Population current density versus voltage relations for CaV2.2 channels with the engineered β2 GK derivatives																	Figure4 - figure supplement 4B: The voltage dependence of normalized steady-state activation for CaV2.2 channels with the engineered β2 GK derivatives
Lyn-GK																	Lyn-GK
Voltage (mV)	n_1	n_2	n_3	n_4	n_5	n_6	n_7	n_8	n_9	Average	SE						Voltage (mV)	n_1	n_2	n_3	n_4	n_5	n_6	n_7	n_8	n_9	Average	SE
-50	-1.91717	-1.78106	-0.453937	-0.158865	-5.44667	-0.368634	-0.550897	-0.441788	-0.67588	-1.31054	0.55751						-50	0	0	0	0	0	0	0	0	0	0	0
-40	-1.05012	-0.768328	0.127039	0.0661937	-4.11307	-0.410485	-0.238087	-0.237689	-0.524337	-0.794321	0.433158						-40	0.0138405	0.0158082	0.0306401	0.00258518	0.0131286	0.0251865	0.000483637	0.00828221	0.0130868	0.0136713	0.00323099
-30	-0.764325	-0.396459	0.0834521	0.0326555	-3.31508	-0.534318	0.0841018	-0.29943	-0.164532	-0.585993	0.35469						-30	0.0228209	0.0265913	0.0688038	0.00581665	0.0249868	0.0509134	0.00340561	0.0173824	0.0269007	0.0275135	0.00690879
-20	-0.610239	-0.379397	0.197202	-0.998641	-9.54408	-0.86282	-0.446829	-0.497451	-0.688436	-1.53674	1.00729						-20	0.0376123	0.0421901	0.105877	0.0121786	0.0587612	0.0660469	0.00300258	0.0266871	0.0422725	0.0438476	0.0102556
-10	-4.44967	-3.43615	-2.89584	-14.4862	-49.5069	-5.27381	-3.25667	-3.68881	-8.36817	-10.5958	5.01718						-10	0.0670893	0.0797739	0.148403	0.0337891	0.205929	0.11469	0.011164	0.052863	0.0683423	0.0868937	0.0201473
0	-17.9608	-16.1028	-23.7152	-77.2607	-96.8834	-22.9121	-20.3871	-20.0178	-57.2705	-39.1678	10.0789						0	0.186476	0.230528	0.247628	0.20021	0.500265	0.268187	0.0883443	0.161554	0.23764	0.235648	0.0376602
10	-35.3552	-31.2349	-52.4355	-132.102	-92.5717	-35.1716	-62.3769	-45.8135	-82.6522	-63.3015	11.1741						10	0.422081	0.518425	0.477701	0.545574	0.753309	0.496271	0.40553	0.420245	0.517034	0.506241	0.0350376
20	-34.5894	-29.2728	-49.9799	-111.066	-60.2841	-29.6008	-62.1605	-44.262	-64.8464	-54.0069	8.47771						20	0.690438	0.772822	0.72304	0.81823	0.866596	0.737326	0.695712	0.698364	0.757998	0.75117	0.0200246
30	-20.9531	-18.4082	-34.2994	-69.5443	-28.033	-16.913	-41.4807	-28.9201	-37.3639	-32.8795	5.3828						30	0.886952	0.951843	0.88878	0.962636	0.968237	0.891904	0.90831	0.870143	0.953261	0.92023	0.012771
40	-8.26011	-7.63209	-16.6479	-26.425	-2.7244	-5.89871	-19.1809	-13.293	-10.6201	-12.298	2.47306						40	1	1	1	1	1	1	1	1	1	1	0
Lyn-6aa-GK																	Lyn-6aa-GK
Voltage (mV)	n_1	n_2	n_3	n_4	n_5	n_6	n_7	n_8	n_9	n_10	Average	SE					Voltage (mV)	n_1	n_2	n_3	n_4	n_5	Average	SE
-50	-0.464127	-2.40377	-1.42756	-1.26885	-1.51453	0.715579	-1.07254	0.698651	-0.390691	1.35666	-0.577119	0.376361					-50	0	0	0	0	0	0	0
-40	-0.315002	-1.60782	-1.17815	-1.23737	-1.1838	0.700815	-0.770727	0.917981	-0.102178	1.33203	-0.344422	0.325425					-40	0.0149942	0.0147198	0.0159162	0.0282743	0.0258879	0.0199585	0.00293887
-30	-0.277556	-1.16265	-0.759956	-1.18528	-0.762469	0.722961	-0.663678	0.874444	0.0876873	1.17693	-0.194957	0.273519					-30	0.0315613	0.030491	0.0335079	0.0575236	0.0489944	0.0404156	0.00543549
-20	-0.0693069	-2.21221	-0.966089	-0.70482	-0.721255	0.170775	-1.18924	0.0209472	-0.281268	0.531464	-0.5421	0.252008					-20	0.0477089	0.0463674	0.0501571	0.0856895	0.0725289	0.0604904	0.00790419
-10	-1.87884	-16.5735	-4.87507	-2.10159	-4.87943	-4.1163	-10.1826	-8.85615	-4.37432	-4.08627	-6.19241	1.42063					-10	0.0741323	0.0747555	0.078534	0.140938	0.115319	0.0967358	0.013462
0	-12.6043	-91.9608	-30.0732	-9.46424	-29.4656	-25.1285	-82.1486	-45.1811	-30.8788	-30.7269	-38.7632	8.67358					0	0.199958	0.192514	0.210471	0.376016	0.274711	0.250734	0.0345394
10	-25.3032	-129.171	-60.0945	-20.1296	-61.7625	-48.4271	-89.1068	-60.1719	-64.4969	-67.911	-62.6575	9.76082					10	0.523959	0.481653	0.51623	0.630593	0.624519	0.555391	0.0303256
20	-20.4127	-98.9244	-47.5951	-16.9549	-50.4642	-40.9071	-62.3375	-45.5109	-58.8918	-58.6513	-50.065	7.28461					20	0.756737	0.731889	0.727749	0.821254	0.838468	0.775219	0.0230132
30	-11.3877	-59.2667	-28.1423	-8.80496	-30.1593	-24.3897	-34.497	-26.3881	-39.1255	-37.5512	-29.9712	4.54692					30	0.903534	0.908527	0.898429	0.949085	0.963629	0.924641	0.0132473
40	-3.59608	-21.0739	-11.486	-3.001	-12.3493	-10.0289	-9.07196	-9.33261	-16.0319	-17.3034	-11.3275	1.80666					40	1	1	1	1	1	1	0
Lyn-11aa-GK																	Lyn-11aa-GK
Voltage (mV)	n_1	n_2	n_3	n_4	n_5	n_6	n_7	n_8	n_9	Average	SE						Voltage (mV)	n_1	n_2	n_3	n_4	n_5	n_6	n_7	n_8	n_9	Average	SE
-50	-0.64864	-0.742554	-0.381648	0.9426	-0.191434	1.12244	1.14168	0.450826	-0.675735	0.113059	0.267474						-50	0	0	0	0	0	0	0	0	0	0	0
-40	-0.614359	-0.495988	-0.193822	0.900715	0.0356611	0.920205	1.1356	0.468103	-0.334277	0.202426	0.222736						-40	0.024052	0.00372656	0.00602225	0.0522134	0.00642988	0.0440678	0.00554205	0.0039094	0.0112033	0.017463	0.00619714
-30	-0.565291	-0.538352	-0.0330775	0.738429	-0.0593698	0.997724	1.04609	0.243179	-0.0701056	0.195469	0.203074						-30	0.0530878	0.00837213	0.0133714	0.108967	0.0140845	0.0892655	0.00213904	0.0072344	0.0242739	0.035644	0.0130806
-20	-0.0916385	-4.60384	-0.115191	0.592575	-2.40771	0.72604	0.703377	0.00977932	-0.624525	-0.645682	0.589551						-20	0.0812568	0.0187742	0.0191895	0.165721	0.0286793	0.136723	0.0110841	0.012373	0.0399378	0.0570821	0.0193104
-10	-2.43615	-33.8389	-2.67667	-0.138717	-19.2349	-1.00751	-2.49429	-2.94439	-5.6812	-7.82808	3.77279						-10	0.128927	0.0773488	0.0324589	0.233825	0.114105	0.19774	0.00495868	0.0309125	0.0736515	0.0993253	0.0258384
0	-10.9171	-117.499	-21.5581	-3.68138	-55.2511	-9.27297	-18.6941	-19.6188	-26.8315	-31.4804	11.8305						0	0.273023	0.368808	0.104828	0.325766	0.446826	0.334463	0.119397	0.140537	0.244813	0.262051	0.0399817
10	-16.2129	-121.065	-66.6394	-10.2121	-52.8746	-16.6813	-39.4437	-39.5617	-42.483	-45.0193	11.3185						10	0.491874	0.664711	0.369195	0.481271	0.690753	0.563842	0.394263	0.408552	0.513485	0.508661	0.0380367
20	-13.7512	-84.3809	-72.2967	-13.3332	-35.328	-13.1457	-35.8145	-35.8741	-32.6927	-37.4019	8.48449						20	0.698808	0.854573	0.669287	0.670829	0.886712	0.753672	0.65192	0.657424	0.753112	0.732926	0.0290159
30	-7.13032	-43.6276	-51.2353	-9.50855	-16.5399	-6.85397	-23.7796	-23.4604	-19.2233	-22.3732	5.23154						30	0.929577	0.946475	0.867306	0.869467	0.945907	0.885876	0.903743	0.87506	0.930498	0.90599	0.0109202
40	-1.30759	-10.1377	-28.071	-4.99595	-2.36069	-1.46431	-11.2935	-9.0814	-7.30364	-8.44619	2.75493						40	1	1	1	1	1	1	1	1	1	1	0
Lyn-15aa-GK																	Lyn-15aa-GK
Voltage (mV)	n_1	n_2	n_3	n_4	n_5	n_6	n_7	Average	SE								Voltage (mV)	n_1	n_2	n_3	n_4	n_5	n_6	Average	SE
-50	0.846806	0.575142	-0.430505	-0.162798	0.702906	0.926579	0.911551	0.481383	0.208232								-50	0	0	0	0	0	0	0	0
-40	0.734541	0.587094	-0.315536	0.125793	0.669806	0.855849	0.687339	0.477841	0.158478								-40	0.0201914	0.00820092	0.00425575	0.0193323	0.0203568	0.0129186	0.0142093	0.00280869
-30	0.784927	0.605166	-0.304279	0.104206	0.544901	0.618697	0.627181	0.425828	0.145531								-30	0.0387002	0.0172219	0.00952477	0.0414114	0.0387198	0.0279041	0.0289137	0.00535965
-20	0.407973	0.389739	-1.62574	-0.0104078	0.135523	0.201693	0.19885	-0.0431955	0.269347								-20	0.059838	0.0267555	0.0171243	0.0661314	0.0608604	0.0402026	0.045152	0.00826851
-10	-2.93391	-2.12444	-14.0489	-2.82463	-4.00244	-3.64032	-2.81417	-4.62697	1.58715								-10	0.0955936	0.0443875	0.0574526	0.0935981	0.0975866	0.0694502	0.0763448	0.00921073
0	-18.9831	-17.1187	-59.3963	-19.0229	-23.6199	-23.485	-17.1725	-25.5426	5.73327								0	0.241771	0.136853	0.332253	0.19607	0.236097	0.244523	0.231261	0.0262427
10	-33.2151	-42.8181	-65.5941	-42.7832	-49.3005	-42.0649	-26.4849	-43.1801	4.67876								10	0.558313	0.488467	0.640288	0.443271	0.539349	0.551468	0.536859	0.0273727
20	-26.5412	-37.1081	-46.2584	-37.245	-40.9429	-34.4674	-19.9989	-34.6517	3.33657								20	0.784415	0.742696	0.839903	0.686246	0.781742	0.763332	0.766389	0.0207835
30	-15.3394	-23.7641	-24.8833	-22.7306	-25.3051	-19.7305	-10.7631	-20.3594	2.06919								30	0.924282	0.904664	0.94427	0.866892	0.909759	0.924556	0.912404	0.0107121
40	-5.7987	-11.5651	-7.1409	-10.4275	-11.8086	-7.58473	-3.85768	-8.31188	1.1479								40	1	1	1	1	1	1	1	0
Lyn-22aa-GK																	Lyn-22aa-GK
Voltage (mV)	n_1	n_2	n_3	n_4	n_5	n_6	n_7	n_8	Average	SE							Voltage (mV)	n_1	n_2	n_3	n_4	n_5	Average	SE
-50	2.80802	-0.232158	1.12865	-2.15972	0.714769	1.06596	0.629889	0.515624	0.558879	0.4944							-50	0	0	0	0	0	0	0
-40	2.23764	-0.0859845	1.02867	-1.40223	0.692746	1.28247	0.519814	0.547209	0.60254	0.373895							-40	0.0747889	0.00703507	0.0151404	0.0227446	0.00304788	0.0245514	0.0130093
-30	1.08225	-0.223299	0.894801	-0.658711	0.561461	1.33921	0.439341	0.500856	0.491989	0.234211							-30	0.150784	0.0136623	0.0360635	0.0510393	9.83187e-05	0.0503295	0.0266109
-20	1.29831	-0.615703	0.676407	-0.498847	0.0503399	0.800995	0.338456	-0.0352773	0.251834	0.232364							-20	0.226779	0.0224307	0.0579329	0.0847753	0.00879953	0.0801435	0.0390112
-10	-0.153563	-6.6711	-1.5673	-3.75725	-4.47167	-2.49421	-1.21126	-4.17134	-3.06221	0.746031							-10	0.305187	0.0431281	0.093681	0.135923	0.0284141	0.121267	0.0497643
0	-7.41956	-47.9444	-13.2191	-14.9456	-22.8966	-16.3582	-10.3585	-23.3545	-19.562	4.50201							0	0.393245	0.196574	0.175691	0.257808	0.159375	0.236539	0.0425812
10	-19.3263	-89.559	-28.6949	-24.6013	-41.4328	-31.7115	-22.8951	-41.4515	-37.4591	7.97564							10	0.553679	0.509584	0.395437	0.434106	0.518238	0.482209	0.0291537
20	-18.5798	-74.1806	-26.2912	-19.5094	-34.6278	-26.5708	-20.8356	-32.5741	-31.6462	6.4202							20	0.717732	0.773654	0.648828	0.647405	0.791564	0.715837	0.030211
30	-12.0005	-45.033	-16.5995	-10.841	-19.6286	-14.6571	-12.3073	-18.5649	-18.704	3.92469							30	0.880579	0.897023	0.851751	0.84982	0.911513	0.878137	0.0121956
40	-5.50766	-19.8903	-7.78622	-2.92277	-7.88076	-6.25212	-5.27872	-7.65699	-7.89694	1.81227							40	1	1	1	1	1	1	0
Lyn-43aa-GK																	Lyn-43aa-GK
Voltage (mV)	n_1	n_2	n_3	n_4	n_5	n_6	n_7	Average	SE								Voltage (mV)	n_1	n_2	n_3	n_4	n_5	n_6	n_7	Average	SE
-50	-0.856539	-1.63857	1.87941	1.27877	-2.8536	0.960428	-1.23424	-0.352048	0.660217								-50	0	0	0	0	0	0	0	0	0
-40	-0.434568	-1.04008	1.56809	1.26182	-2.57479	0.911587	-1.04417	-0.19316	0.569281								-40	0.0551091	0.0101073	0.0445084	0.0415264	0.0110821	0.0158366	0.000229497	0.0254856	0.00797564
-30	-0.473406	-0.851972	1.19785	1.1121	-1.64778	0.596682	-0.939502	-0.14372	0.420625								-30	0.0952928	0.0185475	0.0887954	0.0852974	0.0220596	0.021567	0.000977858	0.0475054	0.0152287
-20	-0.21256	-0.752013	1.05515	0.7279	-0.942418	0.47919	-1.36508	-0.144261	0.348105								-20	0.144661	0.0304262	0.130868	0.130191	0.0293779	0.0329235	0.000738383	0.0713123	0.0230311
-10	-0.608814	-4.08272	-1.22194	-2.89182	-1.85079	-1.42801	-6.78466	-2.69553	0.809613								-10	0.202067	0.0408461	0.175155	0.181818	0.0456874	0.0515732	0.00740379	0.10065	0.030909
0	-5.44364	-24.2804	-9.90109	-19.9311	-11.805	-11.6495	-38.5167	-17.3611	4.26283								0	0.288175	0.0820048	0.2593	0.271605	0.0852065	0.102938	0.0852034	0.167776	0.0374324
10	-13.2616	-63.7237	-18.0503	-36.1765	-42.7641	-25.5593	-77.2664	-39.5431	8.96774								10	0.443169	0.24143	0.414305	0.457912	0.255619	0.217545	0.392331	0.346044	0.0391525
20	-12.3159	-64.7718	-16.036	-28.4879	-50.7801	-29.3593	-64.2137	-37.9949	8.2728								20	0.655568	0.516516	0.673384	0.708193	0.561945	0.491561	0.703649	0.615831	0.0342763
30	-7.15777	-44.1082	-9.65985	-15.4855	-32.8561	-22.6633	-36.7581	-24.0984	5.36536								30	0.820896	0.761384	0.836138	0.876543	0.85886	0.801	0.886249	0.834439	0.0166868
40	-1.99649	-22.3474	-3.17584	-4.293	-14.2236	-12.5006	-13.9258	-10.3518	2.82122								40	1	1	1	1	1	1	1	1	0
GK																	GK
Voltage (mV)	n_1	n_2	n_3	n_4	n_5	n_6	n_7	n_8	Average	SE							Voltage (mV)	n_1	n_2	n_3	n_4	n_5	n_6	n_7	n_8	Average	SE
-50	0.115563	0.695054	-0.260676	-1.03648	0.321986	-0.704082	-0.650669	-0.0852729	-0.200573	0.204718							-50	0	0	0	0	0	0	0	0	0	0
-40	0.450267	0.996505	-0.0224826	-0.649372	0.486845	-0.154609	-0.209488	0.129763	0.128429	0.179665							-40	0.0259837	0.0148225	0.0157134	0.0262955	0.0103963	0.0465909	0.0235611	0.0132044	0.022071	0.00410678
-30	0.790965	1.77747	0.116666	-0.220068	0.74701	0.343699	0.0781961	-0.565767	0.383521	0.256094							-30	0.0494012	0.0277662	0.0306935	0.0593025	0.0209985	0.0886364	0.048951	0.0301518	0.0444876	0.00783741
-20	0.502484	2.38778	0.187759	-0.205245	0.294939	0.0500532	0.363949	0.163872	0.468199	0.284307							-20	0.0739949	0.0386221	0.048921	0.0813071	0.0301595	0.119318	0.0769231	0.0419006	0.0638933	0.0104637
-10	-4.60454	1.60136	-3.67194	-2.2195	-2.80515	-1.95875	-5.15901	-2.77174	-2.69866	0.730911							-10	0.101796	0.0593946	0.0697674	0.119815	0.0490993	0.176136	0.112426	0.0612393	0.0937092	0.0150514
0	-24.7407	-5.11294	-22.9352	-14.3973	-19.7468	-11.8982	-38.3923	-21.1492	-19.7966	3.50784							0	0.188409	0.107516	0.128431	0.179228	0.0931549	0.276136	0.173749	0.120399	0.158378	0.0209677
10	-39.7091	-21.4221	-44.9286	-27.5678	-53.5155	-21.9924	-69.1794	-47.0217	-40.6671	5.86789							10	0.319932	0.270355	0.293945	0.33546	0.256819	0.410227	0.363098	0.276357	0.315774	0.0184848
20	-32.3311	-26.9739	-41.4025	-25.7753	-66.0576	-18.7244	-58.8952	-50.9287	-40.1361	6.03674							20	0.570145	0.557411	0.569453	0.578612	0.515183	0.598864	0.636364	0.52173	0.56847	0.0138786
30	-15.3297	-18.7692	-27.5818	-16.8227	-52.5959	-11.8459	-38.2302	-35.0969	-27.034	4.97193							30	0.795766	0.808977	0.814582	0.80746	0.759135	0.8875	0.823561	0.781659	0.80983	0.0132365
40	0.00599215	-7.4488	-13.3316	-6.23203	-27.2091	-2.52824	-17.8654	-16.9241	-11.4416	3.21016							40	1	1	1	1	1	1	1	1	1	0
Figure4 - figure supplement 4C: Peak current density at 10 mV (pA/pF) of CaV2.2 channels with the engineered β2 GK derivatives																	Figure4 - figure supplement 4D: The magnitude of fluctuation in the V1/2 of normalized steady-state activation from the mean of Lyn-GK in cells expressing CaV2.2 channels with the engineered β2 GK derivatives
Statistical analysis from GraphPad Prism 7.0 (one-way ANOVA followed by Tukey post-hoc test)																	Statistical analysis from GraphPad Prism 7.0 (one-way ANOVA followed by Tukey post-hoc test)
Current density	n_1	n_2	n_3	n_4	n_5	n_6	n_7	n_8	n_9	n_10	Average	SE					V1/2, inact (mV)	n_1	n_2	n_3	n_4	n_5	n_6	n_7	n_8	n_9	Average	SE
Lyn-GK	-35.3552	-31.2349	-52.4355	-132.102	-92.5717	-35.1716	-62.3769	-45.8135	-82.6522		-63.3015	11.1741					Lyn-GK	14.169	10.434	13.509	9.1726	0.43025	11.745	13.727	13.79	10.625	10.8446	1.43089
Lyn-6aa-GK	-25.3032	-129.171	-60.0945	-20.1296	-61.7625	-48.4271	-89.1068	-60.1719	-64.4969	-67.911	-62.6575	9.76082					Lyn-6aa-GK	10.51	12.017	11.281	6.045	7.3516					9.44092	1.16324
Lyn-11aa-GK	-16.2129	-121.065	-66.6394	-10.2121	-52.8746	-16.6813	-39.4437	-39.5617	-42.483		-45.0193	11.3185					Lyn-11aa-GK	13.209	4.5312	15.154	24.204	2.6221	10.633	14.965	14.833	10.631	12.3091	2.12058
Lyn-15aa-GK	-33.2151	-42.8181	-65.5941	-42.7832	-49.3005	-42.0649	-26.4849				-43.1801	4.67876					Lyn-15aa-GK	9.3119	11.455	5.6169	14.451	9.7653	9.5195				10.0199	1.18176
Lyn-22aa-GK	-19.3263	-89.559	-28.6949	-24.6013	-41.4328	-31.7115	-22.8951	-41.4515			-37.4591	7.97564					Lyn-22aa-GK	29.431	10.188	16.686	18.129	9.8518					16.8572	3.5588
Lyn-43aa-GK	-13.2616	-63.7237	-18.0503	-36.1765	-42.7641	-25.5593	-77.2664				-39.5431	8.96774					Lyn-43aa-GK	25.885	22.953	20.133	15.949	19.358	22.766	13.69			20.1049	1.60047
GK	-39.7091	-21.4221	-44.9286	-27.5678	-53.5155	-21.9924	-69.1794	-47.0217			-40.6671	5.86789					GK	23.718	20.707	20.582	22.947	23.55	23.493	18.673	23.342		22.1265	0.666873
