# Supplementary material for: Molecular basis of the PIP2-dependent regulation of CaV2.2 channel and its modulation by CaV β subunits
Source: eLife. 2022 Nov 14;11:e69500. doi: 10.7554/eLife.69500 (PMC9662827; doi:10.7554/eLife.69500)
Supplement: Figure 4—source data 1. [file elife-69500-fig4-data1.xlsx]

## Sheet: Sheet1
Figure 4 - Source Data 1
Current inactivation (r100) and current inhibition (%) by PIP2 depletion in CaV2.2 channels with the engineered β2 GK derivatives.
Figure4 B and D: Current inactivation (r100) in CaV2.2 channels with the engineered β2 GK derivatives
Current inactivation (r100)	n_1	n_2	n_3	n_4	n_5	n_6	n_7	n_8	n_9	n_10	n_11	n_12	Average	SE
Lyn-GK	1.04994	1.03479	1.12183	1.07448	1.09088	1.04049	1.04857	1.17047	1.16884	1.05227			1.08526	0.0163178
Lyn-6aa-GK	1.07	1.0177	1.07341	1.09733	0.938117	0.987114	1.05104	1.20893	1.10445	1.08827			1.06364	0.0232218
Lyn-11aa-GK	0.828526	0.895654	0.949675	0.85842	0.832877	0.876672	0.834551	0.883252	1.06603	1.02186			0.904751	0.0824127
Lyn-15aa-GK	0.78807	0.89716	0.750487	0.911774	0.789105	0.757905	0.809055	0.832247	0.857366				0.821463	0.0192515
Lyn-22aa-GK	0.255928	0.567722	0.292825	0.412155	0.365795	0.402716	0.480395	0.454433	0.438144	0.368198	0.572454	0.56674	0.431459	0.0300578
Lyn-43aa-GK	0.0882319	0.149283	0.211865	0.145119	0.151066	0.138625	0.225493	0.185701	0.334955	0.296352			0.192669	0.0240813
GK	0.138763	0.282533	0.313917	0.123509	0.0983323	0.155316	0.218346	0.298923	0.327225	0.129674	0.156009		0.203868	0.0260676
Figure4 C and D: Current inhibition (%) by PIP2 depletion in CaV2.2 channels with the engineered β2 GK derivatives
Current inhibition (%)	n_1	n_2	n_3	n_4	n_5	n_6	n_7	n_8	n_9	n_10	Average	SE
Lyn-GK	-2.82503	4.60226	3.11997	1.18942	-2.52762	-1.93917	4.18034	4.35203	7.24858	4.18034	2.15811	1.10714
Lyn-6aa-GK	5.79138	8.91231	5.30804	7.85345	9.20457	5.79353	1.16321	5.70671	5.81228	0.121847	5.56673	0.936556
Lyn-11aa-GK	7.8919	16.1815	7.47277	9.43819	7.9545	5.03799	7.75838	10.4725	9.15514	6.77056	8.81334	0.94559
Lyn-15aa-GK	18.4402	14.2146	25.7121	20.1232	25.9033	15.4736	27.7296	14.18			20.2221	1.969
Lyn-22aa-GK	22.8217	24.7891	32.0275	31.0227	30.5807	33.5047	30.4843	25.1618	26.5963	34.0844	29.1073	1.249
Lyn-43aa-GK	25.3592	31.709	27.1692	40.5081	28.6423	25.748	26.2939	29.0874			29.3146	1.7608
GK	34.9183	22.103	38.7258	28.748	31.1553	25.2386	31.6118	36.1244	34.6638		31.4766	1.78925
Figure4E: Normalized mean current inactivation and mean current inhibition by PIP2 depletion versus additional linker length of β2 GK derivatives
Linker (a.a)	PIP2	r100
0	1	1
6	0.942857	0.853891
11	0.828571	0.551349
15	0.371429	0.267392
22	0.00816327	0.0166588
43	0	0
