# Supplementary material for: Molecular basis of the PIP2-dependent regulation of CaV2.2 channel and its modulation by CaV β subunits
Source: eLife. 2022 Nov 14;11:e69500. doi: 10.7554/eLife.69500 (PMC9662827; doi:10.7554/eLife.69500)
Supplement: Figure 5—figure supplement 2—source data 1. [file elife-69500-fig5-figsupp2-data1.xlsx]

## Sheet: Sheet1
Figure ５ - figure supplement ２ - Source Data 1
Current inactivation (r100) and current inhibition (%) by PIP2 depletion in CaV2.2 channels with Lyn-β2c and Lyn-48aa-β2c.
Figure5 - figure supplement 2A and B: Current inactivation (r100) in cells expressing α1B WT and 4A mutants with Lyn-β2c and Lyn-48aa-β2c
Statistical analysis from GraphPad Prism 7.0 (two-way ANOVA followed by Sidak's multiple comparisons test)
Current inactivation (r100)	n_1	n_2	n_3	n_4	n_5	n_6	n_7	n_8	n_9	n_10	n_11	Average	SE
α1B WT+Lyn-β2c	0.970403	0.965595	0.963371	0.914826	0.904714	0.889778	0.90288	0.966109				0.93471	0.01222
α1B WT+Lyn-48aa-β2c	0.726327	0.601997	0.649083	0.663988	0.691238	0.450462	0.599551	0.475981				0.607328	0.0348732
α1B 4A+Lyn-β2c	1.0384	1.02068	0.993223	0.990206	0.955352	1.02296	0.971156	0.970369	0.934479	0.984595		0.988141	0.0102189
α1B 4A+Lyn-48aa-β2c	0.875067	0.826432	0.878529	0.903059	0.723152	0.802319	0.846673	0.808911	0.818613	0.868469	0.878234	0.839042	0.0152789
Figure5 - figure supplement 2C and D: Current inhibition (%) by PIP2 depletion in cells expressing α1B WT and 4A mutants with Lyn-β2c and Lyn-48aa-β2c
Statistical analysis from GraphPad Prism 7.0 (two-way ANOVA followed by Sidak's multiple comparisons test)
Current inhibition (%)	VSP_1	VSP_2	VSP_3	VSP_4	VSP_5	VSP_6	VSP_7	VSP_8	VSP_9	VSP_10	VSP_11	Average	SE
α1B WT+Lyn-β2c	2.51	9.72	10.3	9.87	5.43	6.23	7.23	3.31	2.99	6.14	7.09	6.44	0.835
α1B WT+Lyn-48aa-β2c	23.7	35.2	34.3	29.9	33.4	27.3	23.9	23.9	24.7	22.1		27.8	1.571
α1B 4A+Lyn-β2c	4.15	3.63	3.8	2.64	8.33	0.223	3.7	5.36	3.23	5.88		4.09	0.675
α1B 4A+Lyn-48aa-β2c	3.35	1.14	4.77	9.16	10.3	5.53	0.116	7.33	3.47	2.62	8.72	5.14	1.02
Current inhibition (%)	No VSP_1	No VSP_2	No VSP_3	No VSP_4	No VSP_5	No VSP_6	No VSP_7	No VSP_8	No VSP_9	No VSP_10	No VSP_11	Average	SE
α1B WT+Lyn-β2c	4.36	-5.12	-3.4	2.42	-4.63	-0.843						-1.2	1.59
α1B WT+Lyn-48aa-β2c	3.95	-4.86	-5.47	0.827	-2.44	1.13						-1.15	1.52
α1B 4A+Lyn-β2c	-6.21	-7.79	-0.139	-0.377	-7.65	-4.23	-3.91	-2.44	-2.47			-3.91	0.953
α1B 4A+Lyn-48aa-β2c	1.23	-0.506	-3.49	5	-3.62	-4.42	-0.405	3.89	3.84	0.164	-1.21	0.0437	0.968
