# Supplementary material for: Molecular basis of the PIP2-dependent regulation of CaV2.2 channel and its modulation by CaV β subunits
Source: eLife. 2022 Nov 14;11:e69500. doi: 10.7554/eLife.69500 (PMC9662827; doi:10.7554/eLife.69500)
Supplement: Figure 5—figure supplement 3—source data 1. [file elife-69500-fig5-figsupp3-data1.xlsx]

## Sheet: Sheet1
Figure ５ - figure supplement 3 - Source Data 1
Current inactivation (r100) and current inhibition (%) by PIP2 depletion in cells expressing WT α1B, α1B R465,466A, and α1B R476,477A with β2a and β2c.
Figure5 - figure supplement 3B and C: Current inactivation (r100) in cells expressing WT α1B, α1B R465,466A, and α1B R476,477A with β2a and β2c
Statistical analysis from GraphPad Prism 7.0 (two-way ANOVA followed by Sidak's multiple comparisons test)
Current inactivation (r100)	n_1	n_2	n_3	n_4	n_5	n_6	n_7	n_8	n_9	Average	SE
WT α1B+β2a	0.840216	0.940032	0.922642	0.972424	0.939898	0.890628				0.91764	0.0189272
α1B 465,466A+β2a	0.939907	0.995838	0.936972	0.873242	0.932483	0.871198	0.952497			0.928877	0.0166648
α1B 476,477A+β2a	0.90522	0.947085	0.845007	0.869641	0.878823	0.968301	0.902862	0.885421	0.898617	0.900108	0.0126525
WT α1B+β2c	0.425477	0.646829	0.525456	0.48398	0.649143	0.613254				0.557357	0.0380126
α1B 465,466A+β2c	0.663916	0.613647	0.837584	0.777112	0.723438	0.786512	0.847383			0.749942	0.0330694
α1B 476,477A+β2c	0.74464	0.756186	0.732	0.801825	0.738297	0.762121	0.731334			0.752343	0.00934861
Figure5 - figure supplement 3D and E: Current inhibition (%) by PIP2 depletion in cells expressing WT α1B, α1B R465,466A, and α1B R476,477A with β2a and β2c.
Statistical analysis from GraphPad Prism 7.0 (two-way ANOVA followed by Sidak's multiple comparisons test)
Current inhibition (%)	n_1	n_2	n_3	n_4	n_5	n_6	n_7	n_8	n_9	n_10	Average	SE
WT α1B+β2a	11.1535	5.61344	2.6451	8.76867	3.7896	3.023					5.83222	1.40486
α1B 465,466A+β2a	4.38329	2.27596	4.50513	6.8286	4.49065	9.50134	2.35703				4.906	0.961576
α1B 476,477A+β2a	6.62576	1.7011	7.24419	7.79251	4.87244	10.5932	1.67901	4.22248	2.90919		5.29333	1.00617
WT α1B+β2c	31.0291	22.9272	27.992	23.9397	31.2	28.8					27.648	1.43215
α1B 465,466A+β2c	10.3214	11.524	5.59265	4.80436	1.15229	2.08879	0.626619				5.15858	1.64389
α1B 476,477A+β2c	3.07625	4.36295	5.6462	7.814	2.40787	1.64205	5.16903	7.58078	8.83699	6.70484	5.3241	0.772481
