# Supplementary material for: Molecular basis of the PIP2-dependent regulation of CaV2.2 channel and its modulation by CaV β subunits
Source: eLife. 2022 Nov 14;11:e69500. doi: 10.7554/eLife.69500 (PMC9662827; doi:10.7554/eLife.69500)
Supplement: Figure 5—source data 1. [file elife-69500-fig5-data1.xlsx]

## Sheet: Sheet1
Figure 5 - Source Data 1
Current inactivation (r100) and current inhibition (%) by PIP2 depletion in cells expressing α1B WT and 4A mutants with β2a and β2c.
Figure5 B and C: Current inactivation (r100) in cells expressing α1B WT and 4A mutants with β2a and β2c
Statistical analysis from GraphPad Prism 7.0 (two-way ANOVA followed by Sidak's multiple comparisons test)
Current inactivation (r100)	n_1	n_2	n_3	n_4	n_5	n_6	n_7	n_8	n_9	n_10	n_11	Average	SE
α1B WT+β2a	0.989283	0.907269	0.891207	0.976537	0.896842	0.942994	0.827689	0.921454	0.887907	0.891852	0.959655	0.917517	0.0141109
α1B WT+β2c	0.603979	0.531956	0.508609	0.619552	0.63709	0.506266	0.519614	0.627858				0.569365	0.0203857
α1B 4A+β2a	0.928698	0.897156	0.962607	0.869761	0.930278	0.901618	0.978378	0.98386	0.922552	0.966299	0.891272	0.930225	0.0115569
α1B 4A+β2c	0.749821	0.832853	0.708239	0.667126	0.739721	0.808527	0.711565	0.797099	0.823952	0.764846	0.804132	0.764353	0.0162528
Figure5 D and E: Current inhibition (%) by PIP2 depletion in cells expressing α1B WT and 4A mutants with β2a and β2c
Statistical analysis from GraphPad Prism 7.0 (two-way ANOVA followed by Sidak's multiple comparisons test)
Current inhibition (%)	VSP_1	VSP_2	VSP_3	VSP_4	VSP_5	VSP_6	VSP_7	VSP_8	VSP_9	VSP_10	VSP_11	VSP_12	Average	SE
α1B WT+β2a	6.47	1.25	3.87	3.51	3.78	4.15	13.5	10.9	8.7	6.87			6.3	1.2
α1B WT+β2c	23.8	31.4	36.7	28.3	29.5	31.7	22.3	31.6					29.4	1.64
α1B 4A+β2a	7.46	10.4	6.82	9.14	2.52	7.59	7.62	3.73	5.38	2.96			6.36	0.836
α1B 4A+β2c	10.6	7.4	10.1	7.5	4.5	6.04	6.25	4.42	4.15	7.5	3.61	3.64	6.31	0.688
Current inhibition (%)	No VSP_1	No VSP_2	No VSP_3	No VSP_4	No VSP_5	No VSP_6	No VSP_7	No VSP_8	No VSP_9	No VSP_10	Average	SE
α1B WT+β2a	3.83	-3.44	2	2.73	-2.28	1.84	-2.71	0.729	-0.774	-1.04	0.0888	0.789
α1B WT+β2c	-3.79	-0.158	-1.45	4.74	-1.53	0.406	-3.97	-1.45	4.08	-1.05	-0.419	0.915
α1B 4A+β2a	2.19	1.16	0.0544	1.76	-1.46	3.74	-1.29	-0.691	-1.77	3.82	0.751	0.663
α1B 4A+β2c	1.9	0.225	-2.94	3.99	2.49	-0.873	2.38	2.5	4.15	-2.04	1.18	0.779
Figure5 F and G: Summary of the V1/2 of normalized steady-state activation in cells expressing α1B WT and 4A mutants with β2a or β2c subunits
Statistical analysis from GraphPad Prism 7.0 (two-way ANOVA followed by Sidak's multiple comparisons test)
V1/2 activation (mV)	n_1	n_2	n_3	n_4	n_5	n_6	n_7	n_8	n_9	n_10	Average	SE
α1B WT+β2a	-1.9598	-6.4027	1.9479	-4.4104	2.6032	-4.6686	-0.98122	7.6937	4.5061		-0.185758	1.56704
α1B WT+β2c	6.4331	9.2309	1.7775	4.7153	1.2905	12	9.1872	4.9784	6.3046	10.19	6.61075	1.12253
α1B 4A+β2a	-2.1219	-3.186	0.54593	-2.8089	-2.1123	2.8198	1.6254				-0.748281	0.899425
α1B 4A+β2c	-3.445	3.9024	1.035	3.9182	7.9961	-6.6165	-5.9199	2.6834	1.4394	-4.3061	0.0687	1.54218
