# Supplementary material for: Molecular basis of the PIP2-dependent regulation of CaV2.2 channel and its modulation by CaV β subunits
Source: eLife. 2022 Nov 14;11:e69500. doi: 10.7554/eLife.69500 (PMC9662827; doi:10.7554/eLife.69500)
Supplement: Figure 6—figure supplement 1—source data 1. — Summary of the prepulse experiments in before and Oxo-M perfused cells with α1B WT and 4A mutants with β2a or β2c subunits. [file elife-69500-fig6-figsupp1-data1.xlsx]

## Sheet: Sheet1
Figure 6 - figure supplement 1 - Source Data 1
Current inhibition (%) of α1B WT and 4A mutants by M2R activation in cells expressing with β2a and β2c. And summary of the prepulse experiments in before and Oxo-M perfused cells with α1B WT and 4A mutants with β2a or β2c subunits.
Figure6 - figure supplement 1B and C: Current inhibition (%) of α1B WT and 4A mutants by M2R activation in cells expressing with β2a and β2c
Statistical analysis from GraphPad Prism 7.0 (two-way ANOVA followed by Sidak's multiple comparisons test)
M2R
Current inhibition (%)	m_1	m_2	m_3	m_4	m_5	m_6	m_7	m_8	m_9	m_10	m_11	m_12	Average	SE
α1B WT+β2a	59.8769	69.3938	59.3434	69.7046	62.9909	68.9637	69.4915	67.7225	58.9819	70.843	72.816	65.3275	66.288	1.39985
α1B 4A+β2a	65.7258	55.4788	67.8013	65.3191	68.1479	65.4957	68.7987	59.3377	63.0385	63.2471			64.2391	1.32038
α1B WT+β2c	74.8092	82.4376	77.4065	74.5728	75.7167	68.6379	63.2	65.6	59.9	69.9	60		70.1982	2.24684
α1B 4A+β2c	76.5852	73.1826	67.6688	71.2711	64.4547	67.7586	72.2726	66.5792	63.7744	66.2912			68.9839	1.31391
Figure6 - figure supplement 1E and F: Summary of the prepulse experiments in before and Oxo-M perfused cells with α1B WT and 4A mutants with β2a or β2c subunits.
Statistical analysis from GraphPad Prism 7.0 (two-way ANOVA followed by Sidak's multiple comparisons test)
	- Prepulse														+ Prepulse
	be_1	be_2	be_3	be_4	be_5	be_6	be_7	be_8	be_9	be_10	be_11	be_12	Average	SE	af_1	af_2	af_3	af_4	af_5	af_6	af_7	af_8	af_9	af_10	af_11	af_12	Average	SE
α1B WT+β2a	43.2092	31.5033	29.0604	28.5322	37.8736	22.6819	22.1515	29.097	10.6426	26.9778	25.2862	31.9495	28.2471	2.35284	90.073	81.122	87.7134	82.3738	85.3382	81.011	73.1056	81.5762	75.1474	77.3227	85.0363	83.0971	81.9097	1.42834
α1B 4A+β2a	32.8618	29.2356	36.0862	27.778	30.625	29.4793	33.7819	29.3686	32.555	29.9575	35.6198		31.5771	0.835932	84.0412	77.997	88.7515	76.6619	81.5913	77.0774	84.6436	83.3016	85.3694	82.7495	91.5148		83.0636	1.40568
α1B WT+β2c	18.6569	8.70457	16.1479	19.9624	22.7379	30.5323	27	35.9	34	20.2	40.6		24.9493	2.88479	53.9646	42.3246	61.0171	58.2086	58.0532	75.8018	65.8	74.4	72.3	57.6	77.9		63.3973	3.30025
α1B 4A+β2c	23.307	25.5193	30.7181	16.2868	33.9422	30.034	26.6757	29.9426	22.8452	25.1306			26.4401	1.59239	67.3691	73.3096	83.3623	67.99	79.7968	75.7473	75.5887	79.5343	76.3811	76.1214			75.5201	1.58146
