# Supplementary material for: Molecular basis of the PIP2-dependent regulation of CaV2.2 channel and its modulation by CaV β subunits
Source: eLife. 2022 Nov 14;11:e69500. doi: 10.7554/eLife.69500 (PMC9662827; doi:10.7554/eLife.69500)
Supplement: Figure 6—source data 1. — Summary of the prepulse experiments in before and Oxo-M perfused cells with α1C-1B WT and 4A mutants with β2a or β2c subunits. [file elife-69500-fig6-data1.xlsx]

## Sheet: Sheet1
Figure 6 - Source Data 1
Current inhibition (%) of α1C-1B WT and 4A mutants by M1R or Dr-VSP activation in cells expressing with β2a and β2c. And summary of the prepulse experiments in before and Oxo-M perfused cells with α1C-1B WT and 4A mutants with β2a or β2c subunits.
Figure6 B and C: Current inhibition (%) of α1C-1B WT and 4A mutants by M1R or Dr-VSP activation in cells expressing with β2a and β2c
Statistical analysis from GraphPad Prism 7.0 (two-way ANOVA followed by Sidak's multiple comparisons test)
M1R
Current inhibition (%)	m_1	m_2	m_3	m_4	m_5	m_6	m_7	m_8	m_9	m_10	Average	SE
α1C-1B WT+β2a	5.57623	12.0489	7.41109	2.62683	5.62391	7.99698	3.98236	3.3373	3.13334		5.74855	1.00745
α1C-1B 4A+β2a	9.60506	5.5006	3.98684	3.73227	2.32857	1.86726					4.50343	1.14836
α1C-1B WT+β2c	32.7182	26.2432	41.4339	36.4714	29.7728	24.1706					31.8017	2.63737
α1C-1B 4A+β2c	14.5218	1.09723	1.22961	10.9746	16.2091	14.4024	6.08719	14.6797	8.23693	0.2807	8.77192	1.98665
Dr-VSP
Current inhibition (%)	v_1	v_2	v_3	v_4	v_5	v_6	v_7	v_8	v_9	v_10	v_11	Average	SE
α1C-1B WT+β2a	11.3051	7.65368	2.67519	0.761845	8.10885	9.0282	8.55103	7.88526	10.9304	4.08541	5.70403	6.97173	1.0033
α1C-1B 4A+β2a	11.4571	10.7595	4.59281	4.4014	7.48805	4.54675	6.33603	8.17105	10.0308	2.49094		7.02744	0.966814
α1C-1B WT+β2c	26.4558	24.6261	23.6437	28.6617	31.0642	30.8902	34.939	27.9085	37.9657	36.6434		30.2798	1.56748
α1C-1B 4A+β2c	9.15917	4.25923	4.98096	6.13585	2.76737	5.18683	5.9264	4.52046	3.13582	4.38826	7.61169	5.27928	0.564543
Figure6 D and E: Summary of the prepulse experiments in before and Oxo-M perfused cells with α1C-1B WT and 4A mutants with β2a or β2c subunits.
Statistical analysis from GraphPad Prism 7.0 (two-way ANOVA followed by Sidak's multiple comparisons test)
	- Prepulse									+ Prepulse
	be_1	be_2	be_3	be_4	be_5	be_6	be_7	Average	SE	af_1	af_2	af_3	af_4	af_5	af_6	af_7	Average	SE
α1C-1B WT+β2a	96.0666	89.1517	94.4453	99.7598	91.512	97.6645		94.7667	1.6046	99.1098	89.7663	93.5512	99.2775	93.4504	97.3197		95.4125	1.54315
α1C-1B 4A+β2a	92.4214	97.1848	95.4599	95.0418	95.106	96.3937		95.2679	0.662297	94.0697	96.8467	95.4561	94.649	96.2725	96.0855		95.5632	0.428224
α1C-1B WT+β2c	83.9603	70.8194	78.1602	72.6679	68.3271			74.787	2.80616	82.6285	67.5915	64.6952	70.8159	66.9695			70.5401	3.17658
α1C-1B 4A+β2c	82.7935	98.9513	96.3082	85.3467	99.1597	89.7747	96.6933	92.7182	2.53797	82.3306	98.8848	96.2437	81.3205	99.2589	91.056	97.0241	92.3027	2.89145
