# Supplementary material for: Molecular basis of the PIP2-dependent regulation of CaV2.2 channel and its modulation by CaV β subunits
Source: eLife. 2022 Nov 14;11:e69500. doi: 10.7554/eLife.69500 (PMC9662827; doi:10.7554/eLife.69500)
Supplement: Figure 7—figure supplement 1—source data 1. [file elife-69500-fig7-figsupp1-data1.xlsx]

## Sheet: Sheet1
Figure 7 - figure supplement 1 - Source Data 1
Current inhibition (%) by PIP2 depletion in cells expressing WT α1B and α1B R578,581A with β2a or β2c.
Figure7 - figure supplement 1B and C: Current inactivation (r100) in cells expressing α1B WT and 4A mutants with Lyn-β2c and Lyn-48aa-β2c
Statistical analysis from GraphPad Prism 7.0 (two-way ANOVA followed by Sidak's multiple comparisons test)
Current inhibition (%)	n_1	n_2	n_3	n_4	n_5	n_6	n_7	n_8	Average	SE
WT α1B+β2a	11.351	6.96327	7.2588	4.17648	3.76107	4.96207			6.41211	1.14806
α1B R578,581A+β2a	5.61316	5.74443	2.56738	4.0396	3.774	2.98772			4.12105	0.538119
WT α1B+β2c	38.5582	19.6471	19.8723	29.7905	36.3985	22.9871	25.5309		27.5407	2.89003
α1B R578,581A+β2c	23.7085	19.2093	27.7104	19.8334	21.5728	19.5168	25.6315	24.3528	22.6919	1.11204
