# Supplementary material for: Molecular basis of the PIP2-dependent regulation of CaV2.2 channel and its modulation by CaV β subunits
Source: eLife. 2022 Nov 14;11:e69500. doi: 10.7554/eLife.69500 (PMC9662827; doi:10.7554/eLife.69500)
Supplement: Figure 7—source data 1. [file elife-69500-fig7-data1.xlsx]

## Sheet: Sheet1
Figure ７ - Source Data 1
Current inactivation (r100), current inhibition (%) by PIP2 depletion and the V1/2 of normalized steady-state activation in cells expressing WT α1B, WT α1B RA/KA, 4A α1B, and 4A α1B RA/KA with β2a or β2c.
Figure７ B and C: Current inactivation (r100) in cells expressing WT α1B, WT α1B RA/KA, 4A α1B, and 4A α1B RA/KA with β2a or β2c.
Statistical analysis from GraphPad Prism 7.0 (two-way ANOVA followed by Sidak's multiple comparisons test)
Current inactivation (r100)	n_1	n_2	n_3	n_4	n_5	n_6	n_7	n_8	n_9	n_10	n_11	n_12	n_13	Average	SE
WT α1B+β2a	0.902677	0.932794	0.886388	0.920991	0.897076									0.907985	0.00836143
WT α1B RA/KA+β2a	0.848059	0.931247	0.820779	0.973488	0.986572	0.924518	0.887748	0.935588	0.860873	0.902707				0.907158	0.0169604
4A α1B+β2a	0.990022	0.881642	0.888495	0.895524	0.871151	0.922518								0.908226	0.0178202
4A α1B RA/KA+β2a	0.987215	0.963673	0.97886	0.936772	0.96539	0.960195								0.965351	0.00708677
WT α1B+β2c	0.631384	0.495742	0.598615	0.569573	0.457879	0.621072	0.683055							0.579617	0.0298467
WT α1B RA/KA+β2c	0.230896	0.36559	0.419729	0.194439	0.143257	0.218425	0.574123	0.461432	0.410556	0.424456	0.478768	0.306799	0.154422	0.337146	0.0383935
4A α1B+β2c	0.740822	0.7429	0.721459	0.803248	0.712453	0.681937	0.740144	0.814391						0.744669	0.0157224
4A α1B RA/KA+β2c	0.85117	0.895903	0.912887	0.94217	0.901666	0.987883	0.940688	0.962821						0.924399	0.0151842
Figure７ D and E: Current inhibition (%) by PIP2 depletion in cells expressing WT α1B, WT α1B RA/KA, 4A α1B, and 4A α1B RA/KA with β2a or β2c.
Statistical analysis from GraphPad Prism 7.0 (two-way ANOVA followed by Sidak's multiple comparisons test)
Current inhibition (%)	n_1	n_2	n_3	n_4	n_5	n_6	n_7	n_8	n_9	n_10	n_11	n_12	n_13	Average	SE
WT α1B+β2a	1.35896	2.9705	6.2924	10.2516	4.25499	8.92066								5.67485	1.41208
WT α1B RA/KA+β2a	-10.374	-11.7678	-9.36346	-11.4661	-9.22108	-11.3039	-0.204854	-8.02155	-1.69782	-0.819696	-5.14689			-7.21701	1.34687
4A α1B+β2a	3.13271	6.59731	6.85213	4.01986	10.1149									6.14339	1.22587
4A α1B RA/KA+β2a	-12.741	-8.18805	-11.3072	-10.3299	-5.73161									-9.65956	1.22991
WT α1B+β2c	23.4141	32.6342	35.0518	41.232	30.5038	23.1728								31.0014	2.8451
WT α1B RA/KA+β2c	10.7174	17.6956	18.4725	17.5576	15.8733	8.96116	10.283	11.692	12.1663	16.5948	20.0875	21.5626		15.1386	1.21207
4A α1B+β2c	4.87952	9.14024	2.94426	6.2462	7.72	5.51	3.71							5.73575	0.8233
4A α1B RA/KA+β2c	-10.3212	-13.7371	-8.51399	-5.13166	-3.88618	-3.24237	-5.41322	-12.2014						-7.80589	1.40404
Figure７ F and G: Summary of the V1/2 of normalized steady-state activation in cells expressing WT α1B, WT α1B RA/KA, 4A α1B, and 4A α1B RA/KA with β2a or β2c.
Statistical analysis from GraphPad Prism 7.0 (two-way ANOVA followed by Sidak's multiple comparisons test)
V1/2 activation (mV)	n_1	n_2	n_3	n_4	n_5	n_6	n_7	n_8	n_9	Average	SE
WT α1B+β2a	-2.0013	-2.1168	1.9781	2.5962	-1.1029					-0.12934	1.00678
WT α1B RA/KA+β2a	22.241	17.755	15.58	23.14	20.827	14.245	16.989			18.6824	1.29262
4A α1B+β2a	2.1725	-3.3914	0.5711	-2.7983	1.6492					-0.35938	1.15005
4A α1B RA/KA+β2a	20.343	19.379	28.781	16.157	18.03	13.412				19.3503	2.13798
WT α1B+β2c	6.3578	9.1957	4.7245	4.9914	6.2899					6.31186	0.793172
WT α1B RA/KA+β2c	17.611	18.768	20.815	21.789	20.385	15.16	17.253	22.388	18.802	19.219	0.780472
4A α1B+β2c	3.8948	-3.3977	1.0411	-4.2981	2.6913					-0.01372	1.63575
4A α1B RA/KA+β2c	13.179	15.163	15.793	17.623	16.039	15.667				15.5773	0.588108
