# Supplementary material for: Molecular basis of the PIP2-dependent regulation of CaV2.2 channel and its modulation by CaV β subunits
Source: eLife. 2022 Nov 14;11:e69500. doi: 10.7554/eLife.69500 (PMC9662827; doi:10.7554/eLife.69500)
Supplement: Supplementary file 1. [file elife-69500-supp1.xlsx]

## Sheet: Sheet1
	Supplementary File 1.
	Primers for β2 chimera constructs
	Name		Forward primer (5’→ 3’)	Reverse primer (5’→ 3’)
	Lyn-β2c-GFP	Lyn	GAATTCTGCAGTCGACGATGGGATGTATAAAATCAAAAG	GTCCACTCGCCTGGTCCATGCTGTCTTTCCCTTTTG
		β2c	AAGGGAAAGACAGCATGGACCAGGCGAGTGGACTGG	GGATCCCGGGCCCGCGTTTGGCGGATGTATACATCCCTG
	Lyn-linker (24,36, or 48aa)	Lyn-linker	GAATTCTGCAGTCGACGATGGGATGTATAAAATCAAAAG	CCACTCGCCTGGTCCATAGCACTACCAGCACTACCAGCACTACC
	-β2c-GFP	β2c	GGTAGTGCTGGTAGTGCTATGGACCAGGCGAGTGGACTG	GGATCCCGGGCCCGCGTTTGGCGGATGTATACATCCCTG
	Lyn-FRB-HOOK-GK	Lyn	GAATTCTGCAGTCGACGATGGGATGTATAAAATCAAAAG	CATGCCACATCTCATGCCAGAGGATAGCACTACCAGCACTACCAG
	-(mCh or YFP)	FRB	GTAGTGCTGGTAGTGCTATCCTCTGGCATGAGATGTGG	GAATAGAATTTCCCTTGCTTTGAGATTCGTCGGAACACATG
		HOOK-GK	CCGACGAATCTCAAAGCAAGGGAAATTCTATTCCAGTAAATC	GACCGGTGGATCCCGGGCCCGCGATTGGCGGATGTATAC
	Lyn-FRB-HOOK-GK-FKBP	Lyn	GAATTCTGCAGTCGACGATGGGATGTATAAAATCAAAAGG	CACTCCACCACCAGCACTGGTGGCCTTCCAGTATGCCTCC
	-(mCh or YFP)	-FRB
		-HOOK
		-GK
		FKBP	GCATACTGGAAGGCCACCAGTGCTGGTGGTGGAGTGCAGGTG	TGGATCCCGGGCCCGCGACCCAGGACCACCAGCACTACCAC
	Lyn-FRB-HOOK-GK-linker-FKBP	Lyn	GAATTCTGCAGTCGACGATGGGATGTATAAAATCAAAAG	GAATAGAATTTCCCTTGCTTTGAGATTCGTCGGAACACATG
	-(mCh or YFP)	-FRB
		HOOK	CCGACGAATCTCAAAGCAAGGGAAATTCTATTCCAGTAAATC	GGTTTCCACCTGCACTCCTTGGCGGATGTATACATCCCTGTTC
		-GK
		-linker
		FKBP	GGATGTATACATCCGCCAAGGAGTGCAGGTGGAAACCATCTCC	GATCCCGGGCCCGCGACCCAGGACCACCAGCACTACCACCAGCACTACC
	Lyn-GK-mCh	Lyn	GAATTCTGCAGTCGACGATGGGATGTATAAAATCAAAAG	CACTGGTCGCATGGAAGCACTACCAGCACTACCAG
		GK	AGTGCTGGTAGTGCTTCCATGCGACCAGTGGTGCTGG	GGATCCCGGGCCCGCGTGGTGGCCTTCCAGTATGCCTC
	Lyn-6aa-GK	Lyn	GAATTCTGCAGTCGACGATGGGATGTATAAAATCAAAAG	GGAGTCTGCCGAACCAGCACTACCAGCACTACCAGC
	-mCh	-6aa
		GK	CGGCAGACTCCTACTCCATGCGACCAGTGGTGCTG	GGATCCCGGGCCCGCGTGGTGGCCTTCCAGTATGCCTC
	Lyn-11aa-GK	Lyn	GAATTCTGCAGTCGACGATGGGATGTATAAAATCAAAAG	CACTGGTCGCATGGAGGATGGGCGGCTGGTGTAGGAG
	-mCh	-11aa
		GK	CCAGCCGCCCATCCTCCATGCGACCAGTGGTGCTGGTG	GGATCCCGGGCCCGCGTGGTGGCCTTCCAGTATGCCTC
	Lyn-15aa-GK	Lyn	GAATTCTGCAGTCGACGATGGGATGTATAAAATCAAAAG	CCACTGGTCGCATGGACACATCTGAATCGGATGGGCGGC
	-mCh	-15aa
		GK	CATCCGATTCAGATGTGTCCATGCGACCAGTGGTGCTGG	GGATCCCGGGCCCGCGTGGTGGCCTTCCAGTATGCCTC
	Lyn-22aa-GK	Lyn	GAATTCTGCAGTCGACGATGGGATGTATAAAATCAAAAG	CCACTGGTCGCATGGACTCCCGGTCCTCTTCCAAAGACAC
	-mCh	-22aa
		GK	GAAGAGGACCGGGAGTCCATGCGACCAGTGGTGCTG	GGATCCCGGGCCCGCGTGGTGGCCTTCCAGTATGCCTC
	Lyn-43aa-GK	Lyn	GAATTCTGCAGTCGACGATGGGATGTATAAAATCAAAAG	CCACTGGTCGCATGGAAGGTTTTGTCTTTGCTTTTTCC
	-mCh	-43aa
		GK	AGCAAAGACAAAACCTTCCATGCGACCAGTGGTGCTGG	GGATCCCGGGCCCGCGTGGTGGCCTTCCAGTATGCCTC
	GK-mCh		ATTCTGCAGTCGACGATGTCCATGCGACCAGTGGTGCTG	GGATCCCGGGCCCGCGTGGTGGCCTTCCAGTATGCCTC
