# Supplementary material for: Molecular basis of the PIP2-dependent regulation of CaV2.2 channel and its modulation by CaV β subunits
Source: eLife. 2022 Nov 14;11:e69500. doi: 10.7554/eLife.69500 (PMC9662827; doi:10.7554/eLife.69500)
Supplement: Supplementary file 2. [file elife-69500-supp2.xlsx]

## Sheet: Sheet1
	Supplementary File 2.
	Primers for deletion or mutagenesis of CaV α1B and β2 constructs
	Name			Forward primer (5’→ 3’)	Reverse primer (5’→ 3’)
	(∆N)β2 WT-mCh			GGTTCGGCAGACTCCTACACCAGCCG	CATCGTCGACTGCAGAATTCGAAGCTTGAGC
	(∆N)β2 Mut		F92A/	ACTGGTGGATAGGAGCGCTGGCTAAAGAAGGCTGTGAAATC	CATTATTAAATTTTTCTTTAACAGCCAGAGCATCTTTGGCCTCG
	-mCh		H94A/
			R107A/V109A
			Y406A/K408A/T410A	CTCCCCAACCCTCTGCTTAGCCGGACTTTAG	GTTACCGCTGGGAGGGTGGGCGGCCGCCCAGGCTGCCTCCAGATAGTCG
	Lyn-(∆N)β2 WT-mCh			GGTTCGGCAGACTCCTACACCAGCCGC	AGCACTACCAGCACTACCAGCACTATCTGCTCCCGCGC
	or
	Lyn-(∆N)β2 Mut-mCh
	4A α1B	R465A/		GTTCCTTATCCGTCGTATGGTGAAAGCACAGAG	CGGAACATCTTCTCCTTCGCCGCGAAGTACGATGAGCTCTCTG
		R466A
		R465A/		GTGAAAGCACAGAGCTTCTACTGGGTGGTAC	CATACGACGGATAAGGAACGCGAACATCGCCTCCTTCGCCGCGAAGTACG
		R466A/
		+
		K469A/
		R472A
	α1B R476A/R477A			GAAGATGTTCCGGTTCCTTATCGCTGCTATGGTGAAAGCACAGAGC	GCTCTGTGCTTTCACCATAGCAGCGATAAGGAACCGGAACATCTTC
	WT α1B RA/KA			CCGGACTCAGATCTCGAGATGGTCCGCTTCGGGGACGA	TCCCGGGCCCGCGGTACCCTAGCACCAGTGATCCTGGT
	or
	4A α1B RA/KA
	α1B R578A/R581A			CCTTCGGAATCAGTGTGCTGGCGGCTCTCGCACTGCTGAGGATTTTC	GAAAATCCTCAGCAGTGCGAGAGCCGCCAGCACACTGATTCCGAAGG
